# Supplementary material for: Dynamics of space-charge waves in the laser beat-wave accelerator. Memorandum report
Source: Royal Society of Chemistry journal article supplement (doi:10.1039/c2cc17610f), 1985-01-30
Supplement: c2cc17610f.pdf [file c2cc17610f.pdf]

## Nonheme iron-oxo and –superoxo reactivities: O<sub>2</sub> binding and spin inversion probability matter

Kyung-Bin Cho,<sup>a</sup> Hui Chen,<sup>b</sup> Deepa Janardanan,<sup>c</sup> Sam P. de Visser,<sup>d</sup> Sason Shaik<sup>\*c</sup> and Wonwoo Nam<sup>\*a</sup>

<sup>a</sup> Dept of Bioinspired Chemistry, Ewha Womans University, Seoul 120-750, Korea. Fax: +82-2-3277-4441; Tel: +82-2-3277-2392; E-mail: wwnam@ewha.ac.kr

<sup>b</sup> CAS Key Laboratory of Photochemistry, Institute of Chemistry, Chinese Academy of Sciences, Beijing, China. E-mail: chenh@iccas.ac.cn

<sup>c</sup> Institute of Chemistry and The Lise Meitner-Minerva Center for Computational Quantum Chemistry, The Hebrew University of Jerusalem, 91904 Jerusalem, Israel. Fax: +972-2-6584680; Tel: +972-2-6585909; E-mail: sason@yfaat.ch.huji.ac.il

<sup>d</sup> Manchester Interdisciplinary Biocenter and School of Chemical Engineering and Analytical Science, The University of Manchester, Manchester, United Kingdom. E-mail: sam.devissier@manchester.ac.uk

Electronic Supplementary Information

## Contents

|                                                                                                                                    |    |
|------------------------------------------------------------------------------------------------------------------------------------|----|
| I. Clarifications to main text .....                                                                                               | 4  |
| Computational details.....                                                                                                         | 4  |
| Choice of TMC stereoisomer .....                                                                                                   | 4  |
| Independent verification of [(N4Py)Fe <sup>IV</sup> O] <sup>2+</sup> versus [(TMC)Fe <sup>IV</sup> O] <sup>2+</sup> barriers ..... | 5  |
| Table SI-1. Calculated barriers (kcal/mol). .....                                                                                  | 6  |
| References.....                                                                                                                    | 6  |
| II. [(N4Py)Fe <sup>IV</sup> O] <sup>2+</sup> (1).....                                                                              | 7  |
| [(N4Py)Fe <sup>IV</sup> O] <sup>2+</sup> (1) with no substrates.....                                                               | 7  |
| Table SII-1. Relative energies (kcal/mol) .....                                                                                    | 7  |
| Table SII-2. Mulliken spin density distribution .....                                                                              | 7  |
| Table SII-3. Geometries (Å and °).....                                                                                             | 7  |
| Reactivity with 1,4-cyclohexadiene .....                                                                                           | 7  |
| Table SII-4. Relative energies (kcal/mol) .....                                                                                    | 7  |
| Table SII-5. Mulliken spin density distribution .....                                                                              | 8  |
| Table SII-6. Geometries (Å and °).....                                                                                             | 8  |
| III. [(N4Py)Fe <sup>III</sup> O <sub>2</sub> ] <sup>2+</sup> (2).....                                                              | 9  |
| [(N4Py)Fe <sup>III</sup> O <sub>2</sub> ] <sup>2+</sup> (2) with no substrates.....                                                | 9  |
| Table SIII-1. Valence electron configurations .....                                                                                | 9  |
| Table SIII-2. Relative energies (kcal/mol) .....                                                                                   | 9  |
| Table SIII-3. Mulliken spin density distribution.....                                                                              | 10 |
| Table SIII-4. Geometries (Å and °).....                                                                                            | 10 |
| Reactivity with 1,4-cyclohexadiene .....                                                                                           | 11 |
| Table SIII-5. Relative energies (kcal/mol) .....                                                                                   | 11 |
| Table SIII-6. Mulliken spin density distribution.....                                                                              | 12 |
| Table SIII-7. Geometries (Å).....                                                                                                  | 13 |
| IV. [(TMC)Fe <sup>IV</sup> O] <sup>2+</sup> (3) .....                                                                              | 14 |
| [(TMC)Fe <sup>IV</sup> O] <sup>2+</sup> (3) with no substrates.....                                                                | 14 |
| Table SIV-1. Relative energies (kcal/mol) .....                                                                                    | 14 |
| Table SIV-2. Mulliken spin density distribution .....                                                                              | 14 |
| Table SIV-3. Geometries (Å and °).....                                                                                             | 15 |
| Reactivity with 1,4-cyclohexadiene .....                                                                                           | 16 |

|                                                                                     |    |
|-------------------------------------------------------------------------------------|----|
| Table SIV-4. Relative energies (kcal/mol) .....                                     | 16 |
| Table SIV-5. Mulliken spin density distribution .....                               | 17 |
| Table SIV-6. Geometries (Å and °).....                                              | 18 |
| V. [(TMC)Fe <sup>III</sup> O <sub>2</sub> ] <sup>2+</sup> (4) .....                 | 19 |
| [(TMC)Fe <sup>III</sup> O <sub>2</sub> ] <sup>2+</sup> (4) with no substrates ..... | 19 |
| Table SV-1. Valence electron configurations.....                                    | 19 |
| Table SV-2. Valence orbitals (natural orbitals and their occupation numbers).....   | 19 |
| Table SV-3. Relative energies (kcal/mol) .....                                      | 23 |
| Table SV-4. Mulliken spin density distribution .....                                | 24 |
| Table SV-5. Geometries (Å and °) .....                                              | 24 |
| Reactivity with 1,4-cyclohexadiene .....                                            | 25 |
| Table SV-6. Relative energies (kcal/mol) .....                                      | 25 |
| Table SV-7. Mulliken spin density distribution .....                                | 26 |
| Table SV-8. Geometries (Å and °) .....                                              | 27 |
| Figure S1. Functional dependence on the CHD C-H activation by 4. ....               | 28 |
| Coordinates .....                                                                   | 29 |
| [(N4Py)FeO] <sup>2+</sup> (1).....                                                  | 29 |
| [(N4Py)FeOO] <sup>2+</sup> (2) .....                                                | 31 |
| [(TMC)FeO] <sup>2+</sup> (3).....                                                   | 37 |
| [(TMC)FeOO] <sup>2+</sup> (4) .....                                                 | 44 |

## I. Clarifications to main text

### Computational details

By default, every single calculation was done using the CPCM scheme to account for solvation (acetonitrile) effects as implemented in Gaussian 09.<sup>[S1]</sup> The reason for including solvent effects in even geometry optimizations was to avoid artificial effects such as self interaction errors (SIE) that is occurring in highly charged species (in our case, 2+) during a DFT run<sup>[S2]</sup>. Geometry optimizations and frequency calculations were done at B3LYP/LACVP level,<sup>[S3]</sup> and single-point calculations on the obtained geometry were done using larger basis set (B3LYP/LACV3P<sup>\*+//LACVP</sup>)<sup>[S3]</sup> in order to extract more accurate energies as well as Mulliken spin density distribution. Certain other functionals were also used here in order to gauge the reliability of B3LYP (see Figure S1). Dispersion was included using DFT-D3 program<sup>[S4]</sup> on the obtained geometry. The free energies could then be calculated as the LACV3P<sup>\*+</sup> obtained energy ( $\Delta E$ ) with addition of zero-point vibrational energy ( $\Delta Z_0$ ), enthalpy ( $\Delta E_{\text{thermal}}$ ) and entropy ( $-\Delta TS$ ,  $T=298\text{K}$ ) contributions from the frequency calculations (at LACVP level) as well as the dispersion correction ( $\Delta D$ ). However, since the geometry optimizations were done in solvent, the obtained geometry is not suitable for gas-phase frequency calculations where it may not be a stationary point. Aggravating the situation, extracting thermal energy contributions from frequency calculations on a dielectric medium solvated model is not theoretically correct either due to several reasons,<sup>[S5]</sup> one of the reasons being “double counting” of energies because the solvent model is parameterized to fit to experimental free energies, i.e. including  $\Delta Z_0$ ,  $\Delta E_{\text{thermal}}$ ,  $-\Delta TS$  and  $\Delta D$ . Hence, one has to review the results from the frequency calculations carefully in order to assess their reliability. The same situation holds for the dispersion corrections as well; the DFT-D3 parametrization may not be optimal for use on a geometry obtained under solvent parametrization. In the current study, all these effects are in many cases unreasonably large, and the final free energies obtained are many times not reasonable, as can be seen in the energy tables below. Hence, we chose to use our common sense judgment in this case and not include these “additives” in our conclusions based on their unreasonable effects as well as theoretical incorrectness. The energies discussed in the main text are, unless otherwise specified, including substrate in the model even if it is not influencing directly the specific energy discussed.

### Choice of TMC stereoisomer

To decide on which TMC structure to calculate on is not an easy task, given the huge number of combinatorial possibilities. For every C-H activation reaction, one has to calculate the reactant, transition state and products (intermediates), hence a minimum of three structures. The reaction could be done with oxo or super-oxo group bound *syn* or *anti* relative to the TMC methyl groups doubling the number of structures to six. For each of these structures, there may or may not be a sixth (solvent) axial ligand present, doubling again the number of structures to 12. There is also the issue of the two  $-\text{CH}_2\text{CH}_2-$  bridges present in the TMC ligand itself. If these two bridges are projected onto the same plane, they could be parallel to each other in direction, or cross, hence

now we have 24 structures to calculate. For **3**, we have two spin states, hence  $24 \times 2 = 48$  calculations. For **4**, we found at least 12 different electronic configurations, leading to  $24 \times 12 = 288$  structures. Hence, for TMC, we would need at least  $48 + 288 = 336$  structural calculations for a complete and full investigation. Since this is not feasible, we used common sense, combined with a smaller number of trial calculations as described below, to sort out the most likely stereo-/electroisomers to calculate.

The strongest clue to the structure of the active stereoisomer of **3** comes from the crystal structure, which shows that the oxo is *anti* to the TMC methyls, has an axial  $\text{CH}_3\text{CN}$  ligand and the  $-\text{CH}_3\text{CH}_3-$  bridge is parallel to each other. As we deem the  $-\text{CH}_3\text{CH}_3-$  bridge orientation not to be relevant to reactivity issues, we reduce the number of possible conformations by keeping this orientation as is in the crystal structure. Despite this, we find that the *syn* structure has a smaller barrier (i.e. relative to the *syn* reactant complex, 10.0 kcal/mol) than the *anti* structure (10.6 kcal/mol), as also found by others previously.<sup>[S6]</sup> However, comparing the reactants to each other, the *anti* structure is 1.9 kcal/mol more stable. Hence, the reason why the *syn* structure has a lower barrier may be because it is already higher up in energy from the beginning. Without the axial ligands, the barriers were found to be low (maximum 8.9 and 7.8 kcal/mol for *syn* and *anti* relative to their reactant complexes, respectively, Table SIV-4). While these barriers are low, no  $\text{CH}_3\text{CN}$  ligand binding means missing out on the binding energy (2.5 and 5.4 kcal/mol for the *syn* and *anti* conformations, respectively), which makes it more likely that the reaction occurs with an axial ligand.

For **4**, the closest available crystal structure is on the  $[(\text{TMC})\text{Fe}^{\text{III}}\text{O}_2]^+$  peroxo species.<sup>[S7]</sup> This structure features the  $\text{O}_2$  moiety bound side-on *syn* to the TMC methyl groups, with no axial ligand and the  $-\text{CH}_3\text{CH}_3-$  bridge cross to each other. We tried many possible stereoisomers for **4**, and always found that the  $\text{CH}_3\text{CN}$  and/or  $\text{O}_2$  binding was endothermic, except in the case where  $\text{CH}_3\text{CN}$  binds *syn* to the methyl groups (in which case the subsequent  $\text{O}_2$ -binding on the opposite side becomes prohibitively expensive). Hence, the least endothermic configuration was found to be when  $\text{O}_2$  binds *syn* with respect to the methyl groups without  $\text{CH}_3\text{CN}$  binding, as found in all available metal(III)peroxo crystal structures.<sup>[S8]</sup> Therefore, we limit our superoxo reactivity study to this species.

### Independent verification of $[(\text{N4Py})\text{Fe}^{\text{IV}}\text{O}]^{2+}$ versus $[(\text{TMC})\text{Fe}^{\text{IV}}\text{O}]^{2+}$ barriers

The barrier calculations of **1** vs. **3** was independently reproduced, using Jaguar<sup>[S9]</sup> gas-phase calculations and its Poisson-Boltzmann solver for single-point solvation (acetonitrile) effects, and Gaussian 03 for frequency calculations and thermal corrections. The models include counter ions which should remove self-interaction errors.<sup>[S10]</sup> It is confirmed that **3** has a lower calculated barrier than **1**.

**Table SI-1. Calculated barriers (kcal/mol).<sup>a</sup>**

|                               | LACV3P <sup>3+</sup> gas | LACV3P <sup>3+</sup> + solv | LACV3P <sup>3+</sup> + solv + G |
|-------------------------------|--------------------------|-----------------------------|---------------------------------|
| <b>Quintet</b>                |                          |                             |                                 |
| <b>1</b> + counter ions + CHD | 14.1                     | 15.0                        | 20.6                            |
| <b>3</b> + counter ions + CHD | 13.1                     | 14.1                        | 18.4                            |
| <b>Triplet</b>                |                          |                             |                                 |
| <b>1</b> + counter ions + CHD | 17.6                     | 18.1                        | 25.6                            |
| <b>3</b> + counter ions + CHD | 21.6                     | 22.3                        | 29.0                            |

<sup>a</sup> Relative to triplet reactant state with substrate separated. The results hold with energies relative to complexed reactants as well. Values for **1** was published in reference [S10].

## References

- [S1] M. J. Frisch, G. W. Trucks, H. B. Schlegel, G. E. Scuseria, M. A. Robb, J. R. Cheeseman, G. Scalmani, V. Barone, B. Mennucci, G. A. Petersson, H. Nakatsuji, M. Caricato, X. Li, H. P. Hratchian, A. F. Izmaylov, J. Bloino, G. Zheng, J. L. Sonnenberg, M. Hada, M. Ehara, K. Toyota, R. Fukuda, J. Hasegawa, M. Ishida, T. Nakajima, Y. Honda, O. Kitao, H. Nakai, T. Vreven, J. A. Montgomery, J. E. Peralta, F. Ogliaro, M. Bearpark, J. J. Heyd, E. Brothers, K. N. Kudin, V. N. Staroverov, R. Kobayashi, J. Normand, K. Raghavachari, A. Rendell, J. C. Burant, S. S. Iyengar, J. Tomasi, M. Cossi, N. Rega, J. M. Millam, M. Klene, J. E. Knox, J. B. Cross, V. Bakken, C. Adamo, J. Jaramillo, R. Gomperts, R. E. Stratmann, O. Yazyev, A. J. Austin, R. Cammi, C. Pomelli, J. W. Ochterski, R. L. Martin, K. Morokuma, V. G. Zakrzewski, G. A. Voth, P. Salvador, J. J. Dannenberg, S. Dapprich, A. D. Daniels, Farkas, J. B. Foresman, J. V. Ortiz, J. Cioslowski and D. J. Fox, Gaussian Inc., Wallingford CT, 2009.
- [S2] a) P. E. M. Siegbahn, *J. Biol. Inorg. Chem.*, 2006, **11**, 695-701. b) A. J. Johansson, M. R. A. Blomberg and P. E. M. Siegbahn, *J. Phys. Chem. C*, 2007, **111**, 12397-12406.
- [S3] a) A. D. Becke, *Phys. Rev. A*, 1988, **38**, 3098. b) A. D. Becke, *J. Chem. Phys.*, 1993, **98**, 1372-1377. c) A. D. Becke, *J. Chem. Phys.*, 1993, **98**, 5648-5652. d) C. Lee, W. Yang and R. G. Parr, *Phys. Rev. B*, 1988, **37**, 785-789. e) P. J. Hay and W. R. Wadt, *J. Chem. Phys.*, 1985, **82**, 299-310.
- [S4] S. Grimme, J. Antony, S. Ehrlich and H. Krieg, *J. Chem. Phys.*, 2010, **132**, 154104.
- [S5] J. Ho, A. Klamt and M. L. Coote, *J. Phys. Chem. A*, 2010, **114**, 13442-13444.
- [S6] a) Y. Wang and K. Han, *J. Biol. Inorg. Chem.*, 2010, **15**, 351-359. b) K. Ray, J. England, A. T. Fiedler, M. Martinho, E. Münck and L. Que Jr., *Angew. Chem. Int. Ed.*, 2008, **47**, 8068-8071.
- [S7] J. Cho, S. Jeon, S. A. Wilson, L. V. Liu, E. A. Kang, J. J. Braymer, M. H. Lim, B. Hedman, K. O. Hodgson, J. S. Valentine, E. I. Solomon and W. Nam, *Nature*, 2011, **478**, 502-505.
- [S8] M. S. Seo, J. Y. Kim, J. Annaraj, Y. Kim, Y. M. Lee, S.-J. Kim, J. Kim and W. Nam, *Angew. Chem. Int. Edn*, 2007, **46**, 377-380. b) J. Cho, R. Sarangi, H. Y. Kang, J. Y. Lee, M. Kubo, T. Ogura, E. I. Solomon and W. Nam, *J. Am. Chem. Soc.*, 2010, **132**, 16977-16986. c) J. Cho, R. Sarangi, J. Annaraj, S. Y. Kim, M. Kubo, T. Ogura, E. I. Solomon and W. Nam, *Nature Chem.*, 2009, **1**, 568-572.
- [S9] Schrodinger, LLC, *Jaguar*, version 7.7, New York, NY, 2010.
- [S10] D. Janardanan, D. Usharani, H. Chen and S. Shaik, *J. Phys. Chem. Lett.*, 2011, **2**, 2610-2617.

## II. [(N4Py)Fe<sup>IV</sup>O]<sup>2+</sup> (1)

### [(N4Py)Fe<sup>IV</sup>O]<sup>2+</sup> (1) with no substrates

**Table SII-1. Relative energies (kcal/mol)**

These energies are not used in the main text, but rather, the energies in Table SII-4 is used.

|                                                       | $\Delta\text{lacvp}$ | $\Delta\text{lacv3p}^{*+}$ | $\Delta E^a$ | $\Delta Z_0$ | $\Delta E_{\text{thermal}}^b$ | $-\text{T}\Delta S^b$ | $\Delta_{\text{Disp}}$ | $\Delta G^c$ |
|-------------------------------------------------------|----------------------|----------------------------|--------------|--------------|-------------------------------|-----------------------|------------------------|--------------|
| <sup>3</sup> [Fe <sup>IV</sup> O(N4Py)] <sup>2+</sup> | 0.00                 | +0.00                      | <b>0.00</b>  | <b>+0.00</b> | <b>+0.00</b>                  | <b>+0.00</b>          | <b>+0.00</b>           | <b>0.00</b>  |
| <sup>5</sup> [Fe <sup>IV</sup> O(N4Py)] <sup>2+</sup> | 14.05                | -5.64                      | <b>8.41</b>  | <b>-1.55</b> | <b>+0.68</b>                  | <b>-2.68</b>          | <b>+2.01</b>           | <b>6.87</b>  |

<sup>a</sup> Sum of the two previous columns. <sup>b</sup> T = 298.15 K. <sup>c</sup>  $\Delta G$ =Sum of the previous five columns.

**Table SII-2. Mulliken spin density distribution**

|                                                       | Fe   | O    | 5 x ligated N | Rest  |
|-------------------------------------------------------|------|------|---------------|-------|
| <sup>3</sup> [Fe <sup>IV</sup> O(N4Py)] <sup>2+</sup> | 1.30 | 0.91 | -0.14         | -0.07 |
| <sup>5</sup> [Fe <sup>IV</sup> O(N4Py)] <sup>2+</sup> | 3.08 | 0.72 | 0.12          | 0.09  |

**Table SII-3. Geometries (Å and °)**

|                                                       | D <sub>Fe-O</sub> | D <sub>Fe-N(eq1)</sub> | D <sub>Fe-N(eq2)</sub> | D <sub>Fe-N(eq3)</sub> | D <sub>Fe-N(eq4)</sub> | D <sub>Fe-N(ax)</sub> | A <sub>N(eq)-Fe-N(eq)</sub> <sup>a</sup> |
|-------------------------------------------------------|-------------------|------------------------|------------------------|------------------------|------------------------|-----------------------|------------------------------------------|
| <sup>3</sup> [Fe <sup>IV</sup> O(N4Py)] <sup>2+</sup> | 1.66              | 1.99                   | 1.99                   | 1.97                   | 1.97                   | 2.06                  | 90.72                                    |
| <sup>5</sup> [Fe <sup>IV</sup> O(N4Py)] <sup>2+</sup> | 1.65              | 2.13                   | 2.13                   | 2.08                   | 2.09                   | 2.08                  | 90.95                                    |

<sup>a</sup> The largest angle of the four possible ones.

## Reactivity with 1,4-cyclohexadiene

**Table SII-4. Relative energies (kcal/mol)**

|                                                                          | $\Delta\text{lacvp}$ | $\Delta\text{lacv3p}^{*+}$ | $\Delta E^a$  | $\Delta Z_0$ | $\Delta E_{\text{thermal}}^b$ | $-\text{T}\Delta S^b$ | $\Delta_{\text{Disp}}$ | $\Delta G^c$  |
|--------------------------------------------------------------------------|----------------------|----------------------------|---------------|--------------|-------------------------------|-----------------------|------------------------|---------------|
| <b>Triplet (S=1)</b>                                                     |                      |                            |               |              |                               |                       |                        |               |
| Reactants, complexed                                                     | <b>0.00</b>          | <b>+0.00</b>               | <b>0.00</b>   | <b>+0.00</b> | <b>+0.00</b>                  | <b>+0.00</b>          | <b>+0.00</b>           | <b>0.00</b>   |
| Transition state                                                         | 10.10                | +3.33                      | <b>13.43</b>  | <b>-3.42</b> | <b>-0.64</b>                  | <b>+3.87</b>          | <b>-4.57</b>           | <b>8.67</b>   |
| Intermediate                                                             | -13.49               | -0.99                      | <b>-14.48</b> | <b>-1.66</b> | <b>+0.13</b>                  | <b>-0.33</b>          | <b>-1.94</b>           | <b>-18.28</b> |
| <b>Quintet (S=2)</b>                                                     |                      |                            |               |              |                               |                       |                        |               |
| Reactants, complexed                                                     | 13.88                | -5.75                      | <b>8.14</b>   | <b>-1.46</b> | <b>+0.69</b>                  | <b>-2.80</b>          | <b>+2.01</b>           | <b>6.57</b>   |
| Transition state                                                         | 17.19                | -4.85                      | <b>12.34</b>  | <b>-3.65</b> | <b>+0.26</b>                  | <b>-0.44</b>          | <b>+1.39</b>           | <b>9.90</b>   |
| Intermediate                                                             | -7.62                | -7.11                      | <b>-14.73</b> | <b>-4.08</b> | <b>+1.09</b>                  | <b>-2.41</b>          | <b>-0.74</b>           | <b>-20.88</b> |
| <b>Triplet (S=1) with two counter ions [ClO<sub>4</sub>]<sup>-</sup></b> |                      |                            |               |              |                               |                       |                        |               |
| Reactants, complexed                                                     | <b>0.00</b>          | <b>+0.00</b>               | <b>0.00</b>   | <b>+0.00</b> | <b>+0.00</b>                  | <b>+0.00</b>          | <b>+0.00</b>           | <b>0.00</b>   |
| Transition state                                                         | 10.57                | +3.18                      | <b>13.75</b>  | <b>-3.69</b> | <b>-0.55</b>                  | <b>+3.98</b>          | <b>-4.44</b>           | <b>9.05</b>   |
| Intermediate                                                             | -13.30               | -0.30                      | <b>-13.59</b> | <b>-1.83</b> | <b>+0.13</b>                  | <b>+1.03</b>          | <b>-1.79</b>           | <b>-16.05</b> |
| <b>Quintet (S=2) with two counter ions [ClO<sub>4</sub>]<sup>-</sup></b> |                      |                            |               |              |                               |                       |                        |               |
| Reactants, complexed                                                     | 13.85                | -4.13                      | <b>9.71</b>   | <b>-1.60</b> | <b>+0.68</b>                  | <b>-1.49</b>          | <b>+0.45</b>           | <b>7.76</b>   |
| Transition state                                                         | 17.32                | -3.69                      | <b>13.63</b>  | <b>-3.58</b> | <b>+0.23</b>                  | <b>+1.33</b>          | <b>+1.10</b>           | <b>12.71</b>  |
| Intermediate                                                             | -10.66               | -5.18                      | <b>-15.85</b> | <b>-3.67</b> | <b>+0.79</b>                  | <b>-0.09</b>          | <b>-1.49</b>           | <b>-20.30</b> |

<sup>a</sup> Sum of the two previous columns. <sup>b</sup> T = 298.15 K. <sup>c</sup>  $\Delta G$ =Sum of the previous five columns. This value is however deemed unreliable and is not used.

**Table SII-5. Mulliken spin density distribution**

|                                                                          | Fe   | O    | 5 x ligated N | Substrate | Rest  |
|--------------------------------------------------------------------------|------|------|---------------|-----------|-------|
| <b>Triplet (S=1)</b>                                                     |      |      |               |           |       |
| Reactants, complexed                                                     | 1.21 | 0.91 | -0.10         | 0.00      | -0.03 |
| Transition state                                                         | 0.99 | 0.71 | -0.10         | 0.40      | -0.01 |
| Intermediate                                                             | 0.99 | 0.16 | -0.15         | 0.98      | 0.02  |
| <b>Quintet (S=2)</b>                                                     |      |      |               |           |       |
| Reactants, complexed                                                     | 3.10 | 0.71 | 0.12          | 0.00      | 0.07  |
| Transition state                                                         | 3.57 | 0.41 | 0.17          | -0.23     | 0.07  |
| Intermediate                                                             | 4.07 | 0.40 | 0.35          | -0.97     | 0.14  |
| <b>Triplet (S=1) with two counter ions [ClO<sub>4</sub>]<sup>-</sup></b> |      |      |               |           |       |
| Reactants, complexed                                                     | 1.18 | 0.94 | -0.08         | 0.00      | -0.05 |
| Transition state                                                         | 0.99 | 0.73 | -0.08         | 0.39      | -0.03 |
| Intermediate                                                             | 0.98 | 0.17 | -0.14         | 0.98      | 0.01  |
| <b>Quintet (S=2) with two counter ions [ClO<sub>4</sub>]<sup>-</sup></b> |      |      |               |           |       |
| Reactants, complexed                                                     | 3.12 | 0.74 | 0.10          | 0.00      | 0.04  |
| Transition state                                                         | 3.57 | 0.44 | 0.17          | -0.21     | 0.03  |
| Intermediate                                                             | 4.20 | 0.45 | 0.25          | -0.97     | 0.08  |

**Table SII-6. Geometries (Å and °)**

|                                                                          | D <sub>Fe-O</sub> | D <sub>Fe-N(eq1)</sub> | D <sub>Fe-N(eq2)</sub> | D <sub>Fe-N(eq3)</sub> | D <sub>Fe-N(eq4)</sub> | D <sub>Fe-N(ax)</sub> | D <sub>O-H</sub> | D <sub>FeOH-C(subs)</sub> | A <sub>Fe-O-H</sub> |
|--------------------------------------------------------------------------|-------------------|------------------------|------------------------|------------------------|------------------------|-----------------------|------------------|---------------------------|---------------------|
| <b>Triplet (S=1)</b>                                                     |                   |                        |                        |                        |                        |                       |                  |                           |                     |
| Reactants, complexed                                                     | 1.66              | 1.99                   | 1.99                   | 1.97                   | 1.97                   | 2.06                  | 2.65             | 1.10                      | 153.55              |
| Transition state                                                         | 1.75              | 1.99                   | 1.99                   | 1.98                   | 1.98                   | 2.05                  | 1.39             | 1.25                      | 124.46              |
| Intermediate                                                             | 1.82              | 1.99                   | 1.99                   | 1.98                   | 1.97                   | 2.03                  | 0.98             | 2.47                      | 116.55              |
| <b>Quintet (S=2)</b>                                                     |                   |                        |                        |                        |                        |                       |                  |                           |                     |
| Reactants, complexed                                                     | 1.65              | 2.14                   | 2.13                   | 2.08                   | 2.09                   | 2.08                  | 2.57             | 1.10                      | 151.37              |
| Transition state                                                         | 1.69              | 2.15                   | 2.16                   | 2.12                   | 2.11                   | 2.18                  | 1.65             | 1.15                      | 165.73              |
| Intermediate                                                             | 1.79              | 2.18                   | 2.18                   | 2.15                   | 2.13                   | 2.27                  | 0.98             | 2.18                      | 160.81              |
| <b>Triplet (S=1) with two counter ions [ClO<sub>4</sub>]<sup>-</sup></b> |                   |                        |                        |                        |                        |                       |                  |                           |                     |
| Reactants, complexed                                                     | 1.65              | 1.99                   | 1.99                   | 1.97                   | 1.97                   | 2.06                  | 2.69             | 1.10                      | 171.63              |
| Transition state                                                         | 1.75              | 1.99                   | 1.99                   | 1.98                   | 1.98                   | 2.05                  | 1.39             | 1.24                      | 124.70              |
| Intermediate                                                             | 1.81              | 1.99                   | 1.99                   | 1.98                   | 1.97                   | 2.03                  | 0.98             | 2.40                      | 117.74              |
| <b>Quintet (S=2) with two counter ions [ClO<sub>4</sub>]<sup>-</sup></b> |                   |                        |                        |                        |                        |                       |                  |                           |                     |
| Reactants, complexed                                                     | 1.65              | 2.14                   | 2.12                   | 2.08                   | 2.09                   | 2.08                  | 2.60             | 1.10                      | 151.49              |
| Transition state                                                         | 1.69              | 2.16                   | 2.15                   | 2.12                   | 2.11                   | 2.18                  | 1.67             | 1.15                      | 170.72              |
| Intermediate                                                             | 1.78              | 2.18                   | 2.17                   | 2.16                   | 2.14                   | 2.27                  | 0.99             | 3.18                      | 155.14              |



### III. [(N4Py)Fe<sup>III</sup>O<sub>2</sub>]<sup>2+</sup> (2)

#### [(N4Py)Fe<sup>III</sup>O<sub>2</sub>]<sup>2+</sup> (2) with no substrates

Table SIII-1. Valence electron configurations

|                                             | $d_{xy}$ | $d_{xz}$ | $d_{yz}$ | $d_{z^2}$ | $d_{x^2-y^2}$ | ${}^{oo}\pi_{xy}^*$ | ${}^{oo}\pi_{xz}^*$ |
|---------------------------------------------|----------|----------|----------|-----------|---------------|---------------------|---------------------|
| Singlet                                     | ↑↓       | ↑↓       | ↑        | ----      | ----          | ↓                   | ↑↓                  |
| Triplet                                     | ↑        | ↑↓       | ↑↓       | ----      | ----          | ↑                   | ↑↓                  |
| Quintet (QI)                                | ↑        | ↑        | ↑        | ----      | ----          | ↑                   | ↑↓                  |
| Quintet (QII) <sup>a</sup>                  | ↑        | ↑        | ↑        | ↑         | ↑             | ↓                   | ↑↓                  |
| Quintet (QIII)                              | ↑        | ↑        | ↑        | ↑         | ↑             | ↑↓                  | ↓                   |
| Quintet sideon (QSI)                        | ↑↓       | ↑        | ↑        | ↑         | ----          | ↑                   | ↑↓                  |
| Quintet sideon (QSII)                       | ↑        | ↑        | ↑        | ↑         | ↑             | ↓                   | ↑↓                  |
| Septet endon                                | ↑        | ↑        | ↑        | ↑         | ↑             | ↑                   | ↑                   |
| Septet sideon                               | ↑        | ↑        | ↑        | ↑         | ↑             | ↑                   | ↑↓                  |
| Septet O <sub>2</sub> -unbound <sup>b</sup> | ↑        | ↑        | ↑↓       | ↑         | ↑             | ↑                   | ↑                   |

<sup>a</sup> As the Fe-O-O angle is linear, the choice of x and y is arbitrary. <sup>b</sup> O<sub>2</sub> was placed approximately 20 Å from the iron.

Table SIII-2. Relative energies (kcal/mol)

These energies are not used in the main text, but rather, the energies in Table SIII-5 is used.

|                                             | $\Delta\text{Iacvp}$ | $\Delta\text{Iacv3p}^{*+}$ | $\Delta E^a$ | $\Delta Z_0$ | $\Delta E_{\text{thermal}}^b$ | $-T\Delta S^b$ | $\Delta_{\text{Disp}}$ | $\Delta G^c$ |
|---------------------------------------------|----------------------|----------------------------|--------------|--------------|-------------------------------|----------------|------------------------|--------------|
| Singlet                                     | -8.19                | +8.06                      | <b>-0.13</b> | <b>+1.91</b> | <b>-0.78</b>                  | <b>+3.23</b>   | <b>-2.59</b>           | <b>1.65</b>  |
| Triplet                                     | -4.63                | +8.86                      | <b>4.23</b>  | <b>+1.72</b> | <b>-0.64</b>                  | <b>+2.07</b>   | <b>-2.62</b>           | <b>4.76</b>  |
| Quintet (QI)                                | 10.25                | +4.49                      | <b>14.74</b> | <b>-0.06</b> | <b>+0.12</b>                  | <b>-0.60</b>   | <b>-0.56</b>           | <b>13.64</b> |
| Quintet (QII)                               | 8.66                 | -0.16                      | <b>8.50</b>  | <b>-0.90</b> | <b>-0.59</b>                  | <b>+0.85</b>   | <b>-1.12</b>           | <b>6.74</b>  |
| Quintet (QIII)                              | 7.59                 | +0.15                      | <b>7.74</b>  | <b>-0.52</b> | <b>+0.30</b>                  | <b>-1.29</b>   | <b>-1.57</b>           | <b>4.66</b>  |
| Quintet sideon (QSI)                        | 7.39                 | +6.24                      | <b>13.64</b> | <b>+0.85</b> | <b>-0.30</b>                  | <b>+1.26</b>   | <b>-1.77</b>           | <b>13.67</b> |
| Quintet sideon (QSII)                       | 5.43                 | -0.30                      | <b>5.13</b>  | <b>-0.05</b> | <b>+0.04</b>                  | <b>+0.11</b>   | <b>-0.08</b>           | <b>5.15</b>  |
| Septet endon                                | 6.97                 | +0.09                      | <b>7.06</b>  | <b>-1.13</b> | <b>+0.73</b>                  | <b>-3.52</b>   | <b>-0.38</b>           | <b>2.75</b>  |
| <b>Septet sideon</b>                        | <b>0.00</b>          | <b>+0.00</b>               | <b>0.00</b>  | <b>+0.00</b> | <b>+0.00</b>                  | <b>+0.00</b>   | <b>+0.00</b>           | <b>0.00</b>  |
| Septet O <sub>2</sub> -unbound <sup>d</sup> | 6.82                 | -5.14                      | <b>1.68</b>  | <b>-1.98</b> | <b>+0.22</b>                  | <b>-4.85</b>   | <b>+3.34</b>           | <b>0.30</b>  |

<sup>a</sup> Sum of the previous two columns. <sup>b</sup> T=298.15 K. <sup>c</sup>  $\Delta G$ =Sum of the previous five columns. <sup>d</sup> O<sub>2</sub> was placed approximately 20 Å from the iron.

**Table SIII-3. Mulliken spin density distribution**

|                                             | Fe   | O <sub>inner</sub> | O <sub>outer</sub> | N <sub>ax</sub> | 4 x N <sub>eq</sub> | Rest |
|---------------------------------------------|------|--------------------|--------------------|-----------------|---------------------|------|
| Singlet                                     | 1.17 | -0.30              | -0.67              | -0.08           | -0.14               | 0.01 |
| Triplet                                     | 1.11 | 0.36               | 0.61               | -0.08           | -0.11               | 0.11 |
| Quintet (QI)                                | 3.10 | 0.26               | 0.60               | -0.14           | 0.07                | 0.10 |
| Quintet (QII)                               | 4.02 | -0.06              | -0.55              | 0.03            | 0.44                | 0.13 |
| Quintet (QIII)                              | 3.98 | 0.02               | -0.54              | -0.03           | 0.38                | 0.19 |
| Quintet sideon (QSI)                        | 2.63 | 0.68               | 0.68               | 0.00            | -0.05               | 0.07 |
| Quintet sideon (QSII)                       | 4.24 | -0.33              | -0.33              | -0.01           | 0.33                | 0.10 |
| Septet endon                                | 3.99 | 0.72               | 0.98               | -0.03           | 0.22                | 0.12 |
| Septet sideon                               | 4.09 | 0.71               | 0.71               | -0.02           | 0.39                | 0.12 |
| Septet O <sub>2</sub> -unbound <sup>a</sup> | 3.57 | 1.00               | 1.00               | -0.06           | 0.22                | 0.27 |

<sup>a</sup> O<sub>2</sub> was placed approximately 20 Å from the iron.

**Table SIII-4. Geometries (Å and °)**

|                                             | D(Fe-O) | D(O-O) | D(Fe-N <sub>ax</sub> ) | D(Fe-N <sub>eq1</sub> ) | D(Fe-N <sub>eq2</sub> ) | D(Fe-N <sub>eq3</sub> ) | D(Fe-N <sub>eq4</sub> ) | A(Fe-O-O) |
|---------------------------------------------|---------|--------|------------------------|-------------------------|-------------------------|-------------------------|-------------------------|-----------|
| Singlet                                     | 1.85    | 1.36   | 2.02                   | 1.99                    | 1.99                    | 1.98                    | 1.98                    | 118.37    |
| Triplet                                     | 1.91    | 1.37   | 2.02                   | 1.98                    | 1.98                    | 1.97                    | 1.97                    | 113.17    |
| Quintet (QI)                                | 1.93    | 1.36   | 2.07                   | 2.01                    | 2.21                    | 2.17                    | 2.00                    | 108.88    |
| Quintet (QII)                               | 1.86    | 1.32   | 2.21                   | 2.16                    | 2.17                    | 2.13                    | 2.13                    | 179.17    |
| Quintet (QIII)                              | 1.90    | 1.33   | 2.20                   | 2.16                    | 2.16                    | 2.13                    | 2.12                    | 138.54    |
| Quintet sideon (QSI)                        | 2.21    | 1.36   | 2.22                   | 2.04                    | 2.04                    | 2.03                    | 2.03                    | 71.94     |
| Quintet sideon (QSII)                       | 2.17    | 1.37   | 2.22                   | 2.17                    | 2.17                    | 2.14                    | 2.14                    | 70.99     |
| Septet endon                                | 2.04    | 1.28   | 2.19                   | 2.18                    | 2.18                    | 2.14                    | 2.14                    | 177.61    |
| Septet sideon                               | 2.17    | 1.36   | 2.21                   | 2.17                    | 2.18                    | 2.14                    | 2.14                    | 71.37     |
| Septet O <sub>2</sub> -unbound <sup>a</sup> | 19.88   | 1.25   | 2.20                   | 2.21                    | 2.21                    | 2.16                    | 2.16                    | 178.29    |

<sup>a</sup> O<sub>2</sub> was placed approximately 20 Å from the iron.

## Reactivity with 1,4-cyclohexadiene

Table SIII-5. Relative energies (kcal/mol)

|                                  | $\Delta\text{Iacvp}$ | $\Delta\text{Iacv3p}^{*+}$ | $\Delta E^a$  | $\Delta Z_0$ | $\Delta E_{\text{Thermal}}^b$ | $-\text{T}\Delta S^b$ | $\Delta_{\text{Disp}}$ | $\Delta G^c$  |
|----------------------------------|----------------------|----------------------------|---------------|--------------|-------------------------------|-----------------------|------------------------|---------------|
| <b>Singlet</b>                   |                      |                            |               |              |                               |                       |                        |               |
| Reactants, complexed             | -8.04                | +8.62                      | <b>0.57</b>   | +1.92        | -0.81                         | +3.53                 | -2.89                  | <b>2.32</b>   |
| Transition state                 | <b>0.66</b>          | <b>+13.60</b>              | <b>14.26</b>  | <b>-1.15</b> | <b>-1.67</b>                  | <b>+7.36</b>          | <b>-5.69</b>           | <b>13.12</b>  |
| Intermediate                     | -14.94               | +10.47                     | <b>-4.47</b>  | +0.80        | -0.92                         | +4.42                 | -3.50                  | <b>-3.66</b>  |
| <b>Triplet</b>                   |                      |                            |               |              |                               |                       |                        |               |
| Reactants, complexed             | -4.94                | +9.54                      | <b>4.60</b>   | +1.91        | -0.76                         | +1.98                 | -2.57                  | <b>5.17</b>   |
| Transition state                 | 1.85                 | +13.49                     | <b>15.34</b>  | <b>-0.87</b> | <b>-1.59</b>                  | <b>+6.03</b>          | <b>-4.27</b>           | <b>14.64</b>  |
| Intermediate                     | -14.93               | 10.46                      | <b>-4.47</b>  | 0.77         | -0.89                         | -3.48                 | 3.11                   | <b>-4.96</b>  |
| <b>Quintet</b>                   |                      |                            |               |              |                               |                       |                        |               |
| Reactants, complexed, QI         | 9.89                 | +4.58                      | <b>14.47</b>  | +0.11        | -0.01                         | -0.19                 | -0.45                  | <b>13.93</b>  |
| Transition state, QI             | 14.69                | +8.98                      | <b>23.67</b>  | -2.85        | -0.84                         | +3.30                 | -2.39                  | <b>20.90</b>  |
| Intermediate, QI                 | -0.74                | +5.91                      | <b>5.17</b>   | -0.79        | -0.21                         | +0.94                 | -1.34                  | <b>3.78</b>   |
| Reactants, complexed, QIII       | 6.65                 | +0.62                      | <b>7.27</b>   | -0.14        | +0.08                         | +0.04                 | -2.62                  | <b>4.64</b>   |
| Transition state, QIII           | 10.53                | +4.74                      | <b>15.27</b>  | -3.42        | -0.43                         | +1.19                 | -1.30                  | <b>11.30</b>  |
| Intermediate, QIII               | -47.35               | +5.48                      | <b>-41.88</b> | +0.05        | +0.31                         | -0.51                 | -2.82                  | <b>-44.85</b> |
| Reactants, complexed, QSII       | 5.50                 | -0.52                      | <b>4.97</b>   | +0.07        | -0.05                         | +0.03                 | +0.75                  | <b>5.79</b>   |
| Transition state, QSII           | 10.48                | +4.96                      | <b>15.44</b>  | -2.84        | -0.66                         | +2.84                 | -1.62                  | <b>13.17</b>  |
| Intermediate, QSII               | -47.27               | +5.39                      | <b>-41.88</b> | +0.12        | +0.29                         | -0.45                 | -2.30                  | <b>-44.23</b> |
| <b>Septet</b>                    |                      |                            |               |              |                               |                       |                        |               |
| Reactants, complexed             | <b>0.00</b>          | <b>+0.00</b>               | <b>0.00</b>   | <b>+0.00</b> | <b>+0.00</b>                  | <b>+0.00</b>          | <b>+0.00</b>           | <b>0.00</b>   |
| Transition state                 | 9.56                 | +5.96                      | <b>15.52</b>  | -3.35        | -0.75                         | +3.51                 | -5.32                  | <b>9.61</b>   |
| Intermediate                     | -1.73                | +2.29                      | <b>0.56</b>   | -1.09        | -0.07                         | +0.58                 | -4.53                  | <b>-4.55</b>  |
| <b>With 2x [ClO<sub>4</sub>]</b> |                      |                            |               |              |                               |                       |                        |               |
| Septet Reactants, complexed      | <b>0.00</b>          | <b>+0.00</b>               | <b>0.00</b>   | <b>+0.00</b> | <b>+0.00</b>                  | <b>+0.00</b>          | <b>+0.00</b>           | <b>0.00</b>   |
| Singlet Reactants, complexed     | -8.63                | +8.66                      | <b>0.03</b>   | +1.85        | -0.79                         | +2.93                 | -2.31                  | <b>1.72</b>   |
| Singlet Transition state         | 0.56                 | +13.93                     | <b>14.49</b>  | -1.27        | -1.65                         | +8.17                 | -5.44                  | <b>14.30</b>  |
| Singlet Intermediate             | -15.42               | +10.86                     | <b>-4.56</b>  | +0.64        | -0.86                         | +4.08                 | -3.31                  | <b>-4.01</b>  |

<sup>a</sup> Sum of the previous two columns. <sup>b</sup> T=298.15 K. <sup>c</sup>  $\Delta G$ = Sum of the previous five columns. This value is however deemed unreliable and is not used.

**Table SIII-6. Mulliken spin density distribution**

|                                              | Fe   | O <sub>inner</sub> | O <sub>outer</sub> | N <sub>ax</sub> | 4 x N <sub>eq</sub> | Substrate         | Rest |
|----------------------------------------------|------|--------------------|--------------------|-----------------|---------------------|-------------------|------|
| <b>Singlet</b>                               |      |                    |                    |                 |                     |                   |      |
| Reactants, complexed                         | 1.17 | -0.34              | -0.64              | -0.08           | -0.15               | 0.00              | 0.04 |
| Transition state                             | 0.97 | 0.06               | -0.38              | -0.07           | -0.08               | -0.49             | 0.01 |
| Intermediate                                 | 0.93 | 0.18               | 0.01               | -0.07           | -0.06               | -1.00             | 0.01 |
| <b>Triplet</b>                               |      |                    |                    |                 |                     |                   |      |
| Reactants, complexed                         | 1.19 | 0.35               | 0.62               | -0.08           | -0.16               | 0.00              | 0.09 |
| Transition state                             | 0.90 | 0.27               | 0.48               | -0.07           | -0.06               | 0.45              | 0.02 |
| Intermediate                                 | 0.93 | 0.18               | 0.01               | -0.07           | -0.06               | 1.00              | 0.01 |
| <b>Quintet</b>                               |      |                    |                    |                 |                     |                   |      |
| Reactants, complexed, QI                     | 3.13 | 0.29               | 0.56               | -0.16           | 0.05                | 0.01              | 0.13 |
| Transition state, QI                         | 3.14 | 0.04               | 0.33               | -0.16           | 0.07                | 0.48              | 0.10 |
| Intermediate, QI                             | 3.00 | 0.04               | -0.03              | -0.16           | 0.07                | 0.99              | 0.09 |
| Reactants, complexed, QIII                   | 3.96 | 0.02               | -0.52              | -0.04           | 0.39                | -0.01             | 0.19 |
| Transition state, QIII                       | 4.01 | 0.33               | -0.23              | -0.06           | 0.30                | -0.50             | 0.16 |
| Intermediate, QIII                           | 3.83 | 0.02               | -0.01              | -0.08           | 0.08                | 0.01 <sup>a</sup> | 0.16 |
| Reactants, complexed, QSII                   | 4.22 | -0.32              | -0.32              | -0.02           | 0.35                | 0.00              | 0.10 |
| Transition state, QSII                       | 4.13 | 0.13               | -0.18              | -0.04           | 0.33                | -0.51             | 0.13 |
| Intermediate, QSII                           | 3.81 | 0.02               | -0.01              | -0.09           | 0.11                | 0.01 <sup>a</sup> | 0.16 |
| <b>Septet</b>                                |      |                    |                    |                 |                     |                   |      |
| Reactants, complexed                         | 4.17 | 0.71               | 0.70               | -0.03           | 0.35                | 0.01              | 0.09 |
| Transition state                             | 4.21 | 0.39               | 0.42               | -0.05           | 0.31                | 0.63              | 0.08 |
| Intermediate                                 | 4.19 | 0.29               | 0.04               | -0.03           | 0.37                | 1.01              | 0.13 |
| <b>With 2x [ClO<sub>4</sub>]<sup>-</sup></b> |      |                    |                    |                 |                     |                   |      |
| Septet Reactants, complexed                  | 4.20 | 0.69               | 0.69               | -0.07           | 0.39                | 0.00              | 0.09 |
| Singlet Reactants, complexed                 | 1.15 | -0.34              | -0.64              | -0.08           | -0.16               | 0.00              | 0.07 |
| Singlet Transition state                     | 0.96 | 0.06               | -0.39              | -0.07           | -0.07               | -0.48             | 0.00 |
| Singlet Intermediate                         | 0.93 | 0.19               | 0.02               | -0.07           | -0.07               | -1.00             | 0.01 |

<sup>a</sup> No spin on the substrate after the reaction indicate that a hydride, rather than a hydrogen atom, transfer has occurred, and we obtain here H<sub>2</sub>O<sub>2</sub> formation by automatic transfer of one more proton from the substrate. This could be self-interaction errors within DFT, or a real effect due to the specific substrate used. As the spin density distribution at the transition states are characteristic of hydrogen atom transfers, the state of the intermediates are immaterial for the barrier discussions.

**Table SIII-7. Geometries (Å)**

|                                              | D <sub>Fe-O</sub> | D <sub>O-O</sub> | D <sub>Fe-N(ax)</sub> | D <sub>Fe-N(eq1)</sub> | D <sub>Fe-N(eq2)</sub> | D <sub>Fe-N(eq3)</sub> | D <sub>Fe-N(eq4)</sub> | D <sub>O-H</sub> | D <sub>H-C</sub> | A <sub>O-O-H</sub> |
|----------------------------------------------|-------------------|------------------|-----------------------|------------------------|------------------------|------------------------|------------------------|------------------|------------------|--------------------|
| <b>Singlet</b>                               |                   |                  |                       |                        |                        |                        |                        |                  |                  |                    |
| Reactants, complexed                         | 1.87              | 1.36             | 2.02                  | 1.99                   | 1.98                   | 1.98                   | 1.98                   | 2.54             | 1.10             | 110.25             |
| Transition state                             | 1.82              | 1.44             | 2.03                  | 2.00                   | 1.99                   | 1.98                   | 1.99                   | 1.39             | 1.25             | 106.97             |
| Intermediate                                 | 1.81              | 1.51             | 2.02                  | 2.00                   | 2.00                   | 1.98                   | 1.98                   | 0.99             | 2.18             | 100.86             |
| <b>Triplet</b>                               |                   |                  |                       |                        |                        |                        |                        |                  |                  |                    |
| Reactants, complexed                         | 1.92              | 1.37             | 2.01                  | 1.99                   | 1.97                   | 1.98                   | 1.97                   | 2.57             | 1.10             | 117.62             |
| Transition state                             | 1.83              | 1.44             | 2.02                  | 2.00                   | 2.00                   | 1.99                   | 1.98                   | 1.47             | 1.21             | 104.64             |
| Intermediate                                 | 1.81              | 1.51             | 2.02                  | 2.00                   | 2.00                   | 1.98                   | 1.98                   | 0.99             | 2.18             | 100.97             |
| <b>Quintet</b>                               |                   |                  |                       |                        |                        |                        |                        |                  |                  |                    |
| Reactants, compl, QI                         | 1.94              | 1.36             | 2.07                  | 2.03                   | 2.22                   | 2.16                   | 2.00                   | 2.54             | 1.10             | 108.37             |
| Transition state, QI                         | 1.87              | 1.42             | 2.10                  | 2.09                   | 2.24                   | 2.16                   | 2.04                   | 1.45             | 1.22             | 107.05             |
| Intermediate, QI                             | 1.83              | 1.49             | 2.07                  | 2.07                   | 2.23                   | 2.16                   | 2.03                   | 1.00             | 2.16             | 102.56             |
| Reactants, compl, QIII                       | 1.89              | 1.33             | 2.20                  | 2.16                   | 2.16                   | 2.13                   | 2.12                   | 2.55             | 1.10             | 92.14              |
| Transition state, QIII                       | 1.89              | 1.40             | 2.24                  | 2.17                   | 2.18                   | 2.15                   | 2.13                   | 1.43             | 1.23             | 104.59             |
| Intermediate, QIII                           | 2.13              | 1.52             | 2.23                  | 2.19                   | 2.27                   | 2.20                   | 2.16                   | 0.99             | 3.21             | 101.26             |
| Reactants, compl, QSII                       | 2.15              | 1.37             | 2.22                  | 2.17                   | 2.17                   | 2.14                   | 2.14                   | 2.71             | 1.10             | 95.10              |
| Transition state, QSII                       | 2.00              | 1.46             | 2.27                  | 2.19                   | 2.17                   | 2.14                   | 2.19                   | 1.47             | 1.22             | 104.69             |
| Intermediate, QSII                           | 2.13              | 1.52             | 2.23                  | 2.23                   | 2.22                   | 2.18                   | 2.20                   | 0.99             | 2.99             | 101.09             |
| <b>Septet</b>                                |                   |                  |                       |                        |                        |                        |                        |                  |                  |                    |
| Reactants, complexed                         | 2.17              | 1.36             | 2.22                  | 2.17                   | 2.17                   | 2.14                   | 2.15                   | 2.74             | 1.10             | 90.49              |
| Transition state                             | 1.99              | 1.47             | 2.27                  | 2.20                   | 2.16                   | 2.13                   | 2.21                   | 1.36             | 1.29             | 106.01             |
| Intermediate                                 | 1.94              | 1.52             | 2.26                  | 2.18                   | 2.16                   | 2.12                   | 2.19                   | 1.00             | 2.11             | 103.26             |
| <b>With 2x [ClO<sub>4</sub>]<sup>-</sup></b> |                   |                  |                       |                        |                        |                        |                        |                  |                  |                    |
| Septet React, compl                          | 2.17              | 1.36             | 2.22                  | 2.18                   | 2.17                   | 2.14                   | 2.14                   | 2.89             | 1.10             | 91.47              |
| Singlet React, compl                         | 1.87              | 1.36             | 2.02                  | 2.00                   | 1.99                   | 1.98                   | 1.97                   | 2.55             | 1.10             | 107.76             |
| Singlet Transition state                     | 1.81              | 1.44             | 2.03                  | 2.00                   | 1.99                   | 1.98                   | 1.99                   | 1.38             | 1.25             | 106.73             |
| Singlet Intermediate                         | 1.80              | 1.51             | 2.02                  | 2.00                   | 2.00                   | 1.98                   | 1.98                   | 0.99             | 2.19             | 100.56             |

## IV. [(TMC)Fe<sup>IV</sup>O]<sup>2+</sup> (3)

### [(TMC)Fe<sup>IV</sup>O]<sup>2+</sup> (3) with no substrates

**Table SIV-1. Relative energies (kcal/mol)**

These energies are not used in the main text, but rather, the energies in Table SIV-4 is used.

|                                                                          | $\Delta_{\text{lacvp}}$ | $\Delta_{\text{lacv3p}^{*+}}$ | $\Delta E^a$ | $\Delta Z_0$ | $\Delta E_{\text{thermal}}^b$ | $-T\Delta S^b$ | $\Delta_{\text{Disp}}$ | $\Delta_{\text{phase}}^c$ | $\Delta G^d$ |
|--------------------------------------------------------------------------|-------------------------|-------------------------------|--------------|--------------|-------------------------------|----------------|------------------------|---------------------------|--------------|
| <b>Syn to methyls</b>                                                    |                         |                               |              |              |                               |                |                        |                           |              |
| <sup>3</sup> [Fe <sup>IV</sup> O(TMC)] <sup>2+</sup>                     | <b>0.00</b>             | <b>+0.00</b>                  | <b>0.00</b>  | <b>+0.00</b> | <b>+0.00</b>                  | <b>+0.00</b>   | <b>+0.00</b>           |                           | <b>0.00</b>  |
| <sup>5</sup> [Fe <sup>IV</sup> O(TMC)] <sup>2+</sup>                     | 6.57                    | -2.42                         | <b>4.14</b>  | -1.77        | +0.57                         | -1.88          | +1.45                  |                           | <b>2.52</b>  |
| <b>Anti to methyls</b>                                                   |                         |                               |              |              |                               |                |                        |                           |              |
| <sup>3</sup> [Fe <sup>IV</sup> O(TMC)] <sup>2+</sup>                     | 0.16                    | +0.98                         | <b>1.15</b>  | +0.45        | -0.22                         | +0.60          | -1.19                  |                           | <b>0.79</b>  |
| <sup>5</sup> [Fe <sup>IV</sup> O(TMC)] <sup>2+</sup>                     | 10.06                   | -1.11                         | <b>8.95</b>  | -1.45        | +0.29                         | -0.89          | -0.10                  |                           | <b>6.80</b>  |
| <b>Syn to methyls, with CNCH<sub>3</sub></b>                             |                         |                               |              |              |                               |                |                        |                           |              |
| <sup>3</sup> [Fe <sup>IV</sup> O(TMC)] <sup>2+</sup> + CNCH <sub>3</sub> | 8.57                    | -4.02                         | <b>4.55</b>  | -1.64        | -0.48                         | -2.44          | +5.13                  | +1.75                     | <b>6.87</b>  |
| <sup>3</sup> [Fe <sup>IV</sup> O(TMC)(CNCH <sub>3</sub> )] <sup>2+</sup> | 1.30                    | +0.73                         | <b>2.03</b>  | +0.08        | +0.04                         | -0.02          | -0.39                  |                           | <b>1.74</b>  |
| <sup>5</sup> [Fe <sup>IV</sup> O(TMC)(CNCH <sub>3</sub> )] <sup>2+</sup> | 10.10                   | -2.30                         | <b>7.80</b>  | -1.75        | +0.62                         | -1.67          | -2.36                  |                           | <b>2.63</b>  |
| <b>Anti to methyls, with CNCH<sub>3</sub></b>                            |                         |                               |              |              |                               |                |                        |                           |              |
| <sup>3</sup> [Fe <sup>IV</sup> O(TMC)] <sup>2+</sup> + CNCH <sub>3</sub> | 8.39                    | -2.95                         | <b>5.44</b>  | -1.18        | -0.19                         | -3.15          | +3.86                  | +1.75                     | <b>6.52</b>  |
| <sup>3</sup> [Fe <sup>IV</sup> O(TMC)(CNCH <sub>3</sub> )] <sup>2+</sup> | <b>0.00</b>             | <b>+0.00</b>                  | <b>0.00</b>  | <b>+0.00</b> | <b>+0.00</b>                  | <b>+0.00</b>   | <b>+0.00</b>           |                           | <b>0.00</b>  |
| <sup>5</sup> [Fe <sup>IV</sup> O(TMC)(CNCH <sub>3</sub> )] <sup>2+</sup> | 7.57                    | -3.03                         | <b>4.54</b>  | -1.81        | +0.56                         | -1.63          | -1.91                  |                           | <b>-0.26</b> |

<sup>a</sup> Sum of the two previous columns. <sup>b</sup> T = 298.15 K. <sup>c</sup> Free energy correction in solution phase due to complexation. <sup>d</sup>  $\Delta G$  = Sum of the previous six columns.

**Table SIV-2. Mulliken spin density distribution**

|                                                                          | Fe   | O    | 4 x N <sub>eq</sub> | CNCH <sub>3</sub> | Rest  |
|--------------------------------------------------------------------------|------|------|---------------------|-------------------|-------|
| <b>Syn to methyls</b>                                                    |      |      |                     |                   |       |
| <sup>3</sup> [Fe <sup>IV</sup> O(TMC)] <sup>2+</sup>                     | 1.35 | 0.73 | -0.07               | ----              | -0.01 |
| <sup>5</sup> [Fe <sup>IV</sup> O(TMC)] <sup>2+</sup>                     | 3.19 | 0.60 | 0.15                | ----              | 0.07  |
| <b>Anti to methyls</b>                                                   |      |      |                     |                   |       |
| <sup>3</sup> [Fe <sup>IV</sup> O(TMC)] <sup>2+</sup>                     | 1.39 | 0.72 | -0.10               | ----              | 0.00  |
| <sup>5</sup> [Fe <sup>IV</sup> O(TMC)] <sup>2+</sup>                     | 3.17 | 0.66 | 0.11                | ----              | 0.06  |
| <b>Syn to methyls, with CNCH<sub>3</sub></b>                             |      |      |                     |                   |       |
| <sup>3</sup> [Fe <sup>IV</sup> O(TMC)(CNCH <sub>3</sub> )] <sup>2+</sup> | 1.42 | 0.80 | -0.17               | -0.01             | -0.03 |
| <sup>5</sup> [Fe <sup>IV</sup> O(TMC)(CNCH <sub>3</sub> )] <sup>2+</sup> | 3.25 | 0.55 | 0.14                | -0.01             | 0.07  |
| <b>Anti to methyls, with CNCH<sub>3</sub></b>                            |      |      |                     |                   |       |
| <sup>3</sup> [Fe <sup>IV</sup> O(TMC)(CNCH <sub>3</sub> )] <sup>2+</sup> | 1.34 | 0.76 | -0.07               | -0.04             | 0.00  |
| <sup>5</sup> [Fe <sup>IV</sup> O(TMC)(CNCH <sub>3</sub> )] <sup>2+</sup> | 3.23 | 0.57 | 0.19                | -0.06             | 0.07  |

**Table SIV-3. Geometries (Å and °)**

|                                                                          | D <sub>Fe-O</sub> | D <sub>Fe-N(eq1)</sub> | D <sub>Fe-N(eq2)</sub> | D <sub>Fe-N(eq3)</sub> | D <sub>Fe-N(eq4)</sub> | D <sub>Fe-N(ax)</sub> |
|--------------------------------------------------------------------------|-------------------|------------------------|------------------------|------------------------|------------------------|-----------------------|
| <b>Syn to methyls</b>                                                    |                   |                        |                        |                        |                        |                       |
| <sup>3</sup> [Fe <sup>IV</sup> O(TMC)] <sup>2+</sup>                     | 1.62              | 2.08                   | 2.13                   | 2.12                   | 2.08                   | ----                  |
| <sup>5</sup> [Fe <sup>IV</sup> O(TMC)] <sup>2+</sup>                     | 1.65              | 2.21                   | 2.13                   | 2.13                   | 2.22                   | ----                  |
| <b>Anti to methyls</b>                                                   |                   |                        |                        |                        |                        |                       |
| <sup>3</sup> [Fe <sup>IV</sup> O(TMC)] <sup>2+</sup>                     | 1.62              | 2.08                   | 2.07                   | 2.08                   | 2.08                   | ----                  |
| <sup>5</sup> [Fe <sup>IV</sup> O(TMC)] <sup>2+</sup>                     | 1.67              | 2.07                   | 2.21                   | 2.22                   | 2.06                   | ----                  |
| <b>Syn to methyls, with CNCH<sub>3</sub></b>                             |                   |                        |                        |                        |                        |                       |
| <sup>3</sup> [Fe <sup>IV</sup> O(TMC)(CNCH <sub>3</sub> )] <sup>2+</sup> | 1.63              | 2.10                   | 2.13                   | 2.13                   | 2.10                   | 2.14                  |
| <sup>5</sup> [Fe <sup>IV</sup> O(TMC)(CNCH <sub>3</sub> )] <sup>2+</sup> | 1.63              | 2.21                   | 2.20                   | 2.20                   | 2.21                   | 2.13                  |
| <b>Anti to methyls, with CNCH<sub>3</sub></b>                            |                   |                        |                        |                        |                        |                       |
| <sup>3</sup> [Fe <sup>IV</sup> O(TMC)(CNCH <sub>3</sub> )] <sup>2+</sup> | 1.64              | 2.11                   | 2.13                   | 2.13                   | 2.11                   | 2.07                  |
| <sup>5</sup> [Fe <sup>IV</sup> O(TMC)(CNCH <sub>3</sub> )] <sup>2+</sup> | 1.65              | 2.16                   | 2.26                   | 2.26                   | 2.16                   | 2.06                  |

## Reactivity with 1,4-cyclohexadiene

Table SIV-4. Relative energies (kcal/mol)

|                                                                                                | $\Delta_{\text{lacvp}}$ | $\Delta_{\text{lacv3p}}^{*+}$ | $\Delta E^a$ | $\Delta Z_0$ | $\Delta E_{\text{thermal}}^b$ | $-T\Delta S^b$ | $\Delta_{\text{Disp}}$ | $\Delta_{\text{phase}}^c$ | $\Delta G^d$ |
|------------------------------------------------------------------------------------------------|-------------------------|-------------------------------|--------------|--------------|-------------------------------|----------------|------------------------|---------------------------|--------------|
| <b>Syn to methyls</b>                                                                          |                         |                               |              |              |                               |                |                        |                           |              |
| <b>Triplet</b>                                                                                 |                         |                               |              |              |                               |                |                        |                           |              |
| Reactant                                                                                       | 0.00                    | +0.00                         | 0.00         | +0.00        | +0.00                         | +0.00          | +0.00                  |                           | 0.00         |
| Transition state                                                                               | 5.65                    | +3.22                         | 8.87         | -3.21        | -0.43                         | +2.86          | -1.95                  |                           | 6.14         |
| Intermediate                                                                                   | -16.05                  | +0.04                         | -16.01       | -2.91        | +0.49                         | +0.04          | -1.80                  |                           | -20.18       |
| <b>Quintet</b>                                                                                 |                         |                               |              |              |                               |                |                        |                           |              |
| Reactant (20Å separated)                                                                       | 7.43                    | -2.99                         | 4.44         | -1.44        | -0.67                         | +1.33          | +5.58                  | +1.89                     | 11.14        |
| Transition state <sup>e</sup>                                                                  | ----                    | ----                          | ----         | ----         | ----                          | ----           | ----                   |                           | ----         |
| Intermediate                                                                                   | -22.58                  | -2.59                         | -25.17       | -4.16        | +0.83                         | -1.07          | +0.36                  |                           | -29.21       |
| <b>Anti to methyls</b>                                                                         |                         |                               |              |              |                               |                |                        |                           |              |
| <b>Triplet</b>                                                                                 |                         |                               |              |              |                               |                |                        |                           |              |
| Reactant                                                                                       | -0.30                   | +1.45                         | 1.15         | +0.86        | -0.40                         | +2.19          | -2.30                  |                           | 1.50         |
| Transition state                                                                               | 12.13                   | +5.94                         | 18.07        | -3.38        | -0.69                         | +4.01          | -5.69                  |                           | 12.32        |
| Intermediate                                                                                   | -6.59                   | +1.76                         | -4.84        | -1.37        | -0.12                         | +2.26          | -3.89                  |                           | -7.96        |
| <b>Quintet</b>                                                                                 |                         |                               |              |              |                               |                |                        |                           |              |
| Reactant                                                                                       | 9.28                    | -0.77                         | 8.51         | -0.89        | +0.07                         | +1.08          | -2.24                  |                           | 6.53         |
| Transition state                                                                               | 9.78                    | -0.87                         | 8.91         | -2.05        | -2.16                         | +0.61          | -0.98                  |                           | 6.37         |
| Intermediate                                                                                   | -16.54                  | -0.83                         | -17.37       | -3.79        | 0.57                          | -0.18          | -1.77                  |                           | -22.53       |
| <b>Syn to methyls, with CNCH<sub>3</sub></b>                                                   |                         |                               |              |              |                               |                |                        |                           |              |
| <b>Triplet</b>                                                                                 |                         |                               |              |              |                               |                |                        |                           |              |
| Reactant                                                                                       | 1.38                    | +0.55                         | 1.93         | +0.30        | -0.03                         | +0.05          | +0.78                  |                           | 3.03         |
| Transition state                                                                               | 18.44                   | +3.97                         | 22.41        | -3.68        | -0.55                         | +3.41          | -3.36                  |                           | 18.23        |
| Intermediate                                                                                   | -6.10                   | -0.54                         | -6.65        | -1.57        | +0.12                         | +0.31          | -1.55                  |                           | -9.33        |
| <b>Quintet</b>                                                                                 |                         |                               |              |              |                               |                |                        |                           |              |
| Reactant                                                                                       | 10.28                   | -2.58                         | 7.70         | -1.92        | +0.09                         | -0.38          | -1.47                  |                           | 4.01         |
| Transition state                                                                               | 12.65                   | -0.76                         | 11.89        | -4.06        | +0.24                         | +0.05          | -2.53                  |                           | 5.58         |
| Intermediate                                                                                   | -17.70                  | -4.56                         | -22.27       | -5.80        | +1.97                         | -6.89          | +4.31                  |                           | -28.67       |
| <b>Anti to methyls, with CNCH<sub>3</sub></b>                                                  |                         |                               |              |              |                               |                |                        |                           |              |
| <b>Triplet</b>                                                                                 |                         |                               |              |              |                               |                |                        |                           |              |
| Reactant                                                                                       | 0.00                    | +0.00                         | 0.00         | +0.00        | +0.00                         | +0.00          | +0.00                  |                           | 0.00         |
| Transition state                                                                               | 15.75                   | +3.91                         | 19.66        | -3.43        | -0.66                         | +3.51          | -4.04                  |                           | 15.05        |
| Intermediate                                                                                   | -8.84                   | -0.29                         | -9.12        | -1.35        | +0.02                         | +0.85          | -2.46                  |                           | -12.06       |
| <b>Quintet</b>                                                                                 |                         |                               |              |              |                               |                |                        |                           |              |
| Reactant                                                                                       | 7.33                    | -3.01                         | 4.32         | -2.17        | +0.69                         | -2.47          | -2.23                  |                           | -1.86        |
| Transition state                                                                               | 11.08                   | -0.48                         | 10.60        | -4.37        | +0.09                         | +1.01          | -3.79                  |                           | 3.54         |
| Intermediate                                                                                   | -9.91                   | -2.44                         | -12.35       | -4.39        | +0.92                         | -2.28          | -3.26                  |                           | -21.37       |
| <b>Anti to methyls, with CNCH<sub>3</sub> and 2x[CF<sub>3</sub>SO<sub>3</sub>]<sup>-</sup></b> |                         |                               |              |              |                               |                |                        |                           |              |
| <b>Triplet</b>                                                                                 |                         |                               |              |              |                               |                |                        |                           |              |
| Reactant                                                                                       | 0.00                    | +0.00                         | 0.00         | +0.00        | +0.00                         | +0.00          | +0.00                  |                           | 0.00         |
| Transition state                                                                               | 17.51                   | +2.69                         | 20.21        | -3.91        | -0.44                         | +2.04          | -5.65                  |                           | 12.25        |
| Intermediate                                                                                   | -7.38                   | -1.38                         | -8.76        | -1.44        | +0.08                         | +0.85          | -2.80                  |                           | -12.07       |
| <b>Quintet</b>                                                                                 |                         |                               |              |              |                               |                |                        |                           |              |
| Reactant                                                                                       | 8.57                    | -4.12                         | 4.45         | -2.28        | +0.68                         | -2.65          | -4.39                  |                           | -4.19        |
| Transition state                                                                               | 12.24                   | -1.33                         | 10.91        | -4.48        | +0.16                         | +0.51          | -6.58                  |                           | 0.52         |
| Intermediate                                                                                   | -8.96                   | -3.05                         | -12.01       | -4.61        | +0.97                         | -1.92          | -6.08                  |                           | -23.65       |

<sup>a</sup> Sum of the two previous columns. <sup>b</sup> T = 298.15 K. <sup>c</sup> Free energy correction in solution phase due to complexation. <sup>d</sup>  $\Delta G$ =Sum of the previous six columns. This value is however deemed unreliable and is not used. <sup>e</sup> Does not exist, but it is a downhill reaction at LACVP level.



**Table SIV-5. Mulliken spin density distribution**

|                                                                                                    | Fe   | O    | 4 x N <sub>eq</sub> | CNCH <sub>3</sub> | Substrate | Rest  |
|----------------------------------------------------------------------------------------------------|------|------|---------------------|-------------------|-----------|-------|
| <b>Syn to methyls</b>                                                                              |      |      |                     |                   |           |       |
| <b>Triplet</b>                                                                                     |      |      |                     |                   |           |       |
| Reactant                                                                                           | 1.33 | 0.73 | -0.06               | ----              | 0.00      | -0.01 |
| Transition state                                                                                   | 1.97 | 0.30 | 0.00                | ----              | -0.32     | 0.04  |
| Intermediate                                                                                       | 2.97 | 0.34 | -0.32               | ----              | -0.98     | 0.00  |
| <b>Quintet</b>                                                                                     |      |      |                     |                   |           |       |
| Reactant (20Å separated)                                                                           | 3.19 | 0.60 | 0.14                | ----              | 0.00      | 0.07  |
| Intermediate                                                                                       | 4.05 | 0.42 | 0.37                | ----              | -0.94     | 0.10  |
| <b>Anti to methyls</b>                                                                             |      |      |                     |                   |           |       |
| <b>Triplet</b>                                                                                     |      |      |                     |                   |           |       |
| Reactant                                                                                           | 1.41 | 0.72 | -0.11               | ----              | 0.00      | -0.02 |
| Transition state                                                                                   | 1.12 | 0.57 | -0.07               | ----              | 0.36      | 0.02  |
| Intermediate                                                                                       | 1.13 | 0.04 | -0.17               | ----              | 1.00      | 0.00  |
| <b>Quintet</b>                                                                                     |      |      |                     |                   |           |       |
| Reactant                                                                                           | 3.14 | 0.62 | 0.16                | ----              | 0.00      | 0.09  |
| Transition state                                                                                   | 3.13 | 0.51 | 0.28                | ----              | -0.06     | 0.14  |
| Intermediate                                                                                       | 3.65 | 0.41 | 0.64                | ----              | -0.97     | 0.26  |
| <b>Syn to methyls, with CNCH<sub>3</sub></b>                                                       |      |      |                     |                   |           |       |
| <b>Triplet</b>                                                                                     |      |      |                     |                   |           |       |
| Reactant                                                                                           | 1.33 | 0.81 | -0.12               | -0.01             | 0.00      | -0.01 |
| Transition state                                                                                   | 1.04 | 0.65 | -0.09               | -0.02             | 0.42      | 0.01  |
| Intermediate                                                                                       | 1.06 | 0.10 | -0.14               | -0.02             | 0.98      | 0.02  |
| <b>Quintet</b>                                                                                     |      |      |                     |                   |           |       |
| Reactant                                                                                           | 3.24 | 0.55 | 0.15                | -0.01             | 0.00      | 0.07  |
| Transition state                                                                                   | 3.70 | 0.30 | 0.09                | 0.08              | -0.24     | 0.08  |
| Intermediate                                                                                       | 4.04 | 0.42 | 0.36                | 0.00              | -0.95     | 0.13  |
| <b>Anti to methyls, with CNCH<sub>3</sub></b>                                                      |      |      |                     |                   |           |       |
| <b>Triplet</b>                                                                                     |      |      |                     |                   |           |       |
| Reactant                                                                                           | 1.36 | 0.79 | -0.10               | -0.04             | 0.00      | -0.01 |
| Transition state                                                                                   | 1.06 | 0.66 | -0.10               | -0.04             | 0.42      | 0.00  |
| Intermediate                                                                                       | 1.08 | 0.09 | -0.14               | -0.04             | 1.00      | 0.01  |
| <b>Quintet</b>                                                                                     |      |      |                     |                   |           |       |
| Reactant                                                                                           | 3.21 | 0.59 | 0.18                | -0.06             | 0.00      | 0.07  |
| Transition state                                                                                   | 3.72 | 0.29 | 0.12                | 0.09              | -0.32     | 0.10  |
| Intermediate                                                                                       | 4.10 | 0.39 | 0.23                | 0.11              | -0.98     | 0.15  |
| <b>Anti to methyls, with CNCH<sub>3</sub><br/>and 2x[CF<sub>3</sub>SO<sub>3</sub>]<sup>-</sup></b> |      |      |                     |                   |           |       |
| <b>Triplet</b>                                                                                     |      |      |                     |                   |           |       |
| Reactant                                                                                           | 1.36 | 0.77 | -0.09               | -0.04             | 0.00      | 0.00  |
| Transition state                                                                                   | 1.05 | 0.66 | -0.11               | -0.03             | 0.42      | 0.01  |
| Intermediate                                                                                       | 1.09 | 0.10 | -0.15               | -0.04             | 0.99      | 0.01  |
| <b>Quintet</b>                                                                                     |      |      |                     |                   |           |       |
| Reactant                                                                                           | 3.20 | 0.59 | 0.16                | -0.05             | 0.00      | 0.11  |
| Transition state                                                                                   | 3.68 | 0.30 | 0.10                | 0.09              | -0.30     | 0.13  |
| Intermediate                                                                                       | 4.09 | 0.45 | 0.22                | 0.09              | -1.02     | 0.16  |

**Table SIV-6. Geometries (Å and °)**

|                                                                                    | D <sub>Fe-O</sub> | D <sub>Fe-N(eq1)</sub> | D <sub>Fe-N(eq2)</sub> | D <sub>Fe-N(eq3)</sub> | D <sub>Fe-N(eq4)</sub> | D <sub>Fe-N(ax)</sub> | D <sub>O-H</sub> | D <sub>C-H</sub> | A <sub>Fe-O-H</sub> |
|------------------------------------------------------------------------------------|-------------------|------------------------|------------------------|------------------------|------------------------|-----------------------|------------------|------------------|---------------------|
| <b>Syn to methyls</b>                                                              |                   |                        |                        |                        |                        |                       |                  |                  |                     |
| <b>Triplet</b>                                                                     |                   |                        |                        |                        |                        |                       |                  |                  |                     |
| Reactant                                                                           | 1.62              | 2.08                   | 2.12                   | 2.11                   | 2.08                   | ----                  | 2.54             | 1.10             | 174.79              |
| Transition state                                                                   | 1.69              | 2.11                   | 2.12                   | 2.12                   | 2.13                   | ----                  | 1.49             | 1.18             | 175.98              |
| Intermediate                                                                       | 1.82              | 2.13                   | 2.13                   | 2.12                   | 2.16                   | ----                  | 0.98             | 2.30             | 141.28              |
| <b>Quintet</b>                                                                     |                   |                        |                        |                        |                        |                       |                  |                  |                     |
| Reactant (20Å separated)                                                           | 1.65              | 2.22                   | 2.13                   | 2.13                   | 2.21                   | ----                  | 19.71            | 1.10             | 178.45              |
| Intermediate                                                                       | 1.78              | 2.20                   | 2.25                   | 2.25                   | 2.20                   | ----                  | 0.98             | 2.14             | 155.69              |
| <b>Anti to methyls</b>                                                             |                   |                        |                        |                        |                        |                       |                  |                  |                     |
| <b>Triplet</b>                                                                     |                   |                        |                        |                        |                        |                       |                  |                  |                     |
| Reactant                                                                           | 1.62              | 2.08                   | 2.07                   | 2.08                   | 2.09                   | ----                  | 2.53             | 1.10             | 169.06              |
| Transition state                                                                   | 1.72              | 2.08                   | 2.08                   | 2.09                   | 2.07                   | ----                  | 1.35             | 1.26             | 150.82              |
| Intermediate                                                                       | 1.80              | 2.09                   | 2.07                   | 2.09                   | 2.07                   | ----                  | 0.98             | 2.54             | 121.96              |
| <b>Quintet</b>                                                                     |                   |                        |                        |                        |                        |                       |                  |                  |                     |
| Reactant                                                                           | 1.66              | 2.09                   | 2.22                   | 2.22                   | 2.08                   | ----                  | 2.56             | 1.10             | 160.89              |
| Transition state                                                                   | 1.66              | 2.10                   | 2.21                   | 2.21                   | 2.10                   | ----                  | 2.05             | 1.11             | 176.34              |
| Intermediate                                                                       | 1.78              | 2.19                   | 2.18                   | 2.18                   | 2.19                   | ----                  | 0.98             | 2.11             | 172.49              |
| <b>Syn to methyls, with CNCH<sub>3</sub></b>                                       |                   |                        |                        |                        |                        |                       |                  |                  |                     |
| <b>Triplet</b>                                                                     |                   |                        |                        |                        |                        |                       |                  |                  |                     |
| Reactant                                                                           | 1.63              | 2.10                   | 2.13                   | 2.13                   | 2.10                   | 2.14                  | 3.27             | 1.10             | 152.08              |
| Transition state                                                                   | 1.73              | 2.12                   | 2.12                   | 2.15                   | 2.10                   | 2.16                  | 1.33             | 1.29             | 145.78              |
| Intermediate                                                                       | 1.80              | 2.11                   | 2.13                   | 2.14                   | 2.10                   | 2.08                  | 0.98             | 2.66             | 118.98              |
| <b>Quintet</b>                                                                     |                   |                        |                        |                        |                        |                       |                  |                  |                     |
| Reactant                                                                           | 1.64              | 2.21                   | 2.20                   | 2.20                   | 2.20                   | 2.13                  | 2.60             | 1.10             | 161.87              |
| Transition state                                                                   | 1.68              | 2.21                   | 2.22                   | 2.22                   | 2.21                   | 2.31                  | 1.66             | 1.15             | 176.45              |
| Intermediate                                                                       | 1.77              | 2.19                   | 2.26                   | 2.26                   | 2.19                   | 4.54                  | 0.98             | 2.10             | 160.66              |
| <b>Anti to methyls, with CNCH<sub>3</sub></b>                                      |                   |                        |                        |                        |                        |                       |                  |                  |                     |
| <b>Triplet</b>                                                                     |                   |                        |                        |                        |                        |                       |                  |                  |                     |
| Reactant                                                                           | 1.64              | 2.11                   | 2.13                   | 2.13                   | 2.11                   | 2.07                  | 2.63             | 1.10             | 179.40              |
| Transition state                                                                   | 1.75              | 2.12                   | 2.13                   | 2.16                   | 2.10                   | 2.08                  | 1.35             | 1.28             | 145.65              |
| Intermediate                                                                       | 1.82              | 2.11                   | 2.14                   | 2.15                   | 2.10                   | 2.02                  | 0.98             | 3.42             | 120.84              |
| <b>Quintet</b>                                                                     |                   |                        |                        |                        |                        |                       |                  |                  |                     |
| Reactant                                                                           | 1.65              | 2.16                   | 2.26                   | 2.26                   | 2.16                   | 2.07                  | 2.62             | 1.10             | 176.65              |
| Transition state                                                                   | 1.71              | 2.20                   | 2.25                   | 2.25                   | 2.20                   | 2.20                  | 1.57             | 1.17             | 177.50              |
| Intermediate                                                                       | 1.80              | 2.21                   | 2.24                   | 2.24                   | 2.21                   | 2.25                  | 0.98             | 2.20             | 179.46              |
| <b>Anti to methyls, with CNCH<sub>3</sub> and 2x[CF<sub>3</sub>SO<sub>3</sub>]</b> |                   |                        |                        |                        |                        |                       |                  |                  |                     |
| <b>Triplet</b>                                                                     |                   |                        |                        |                        |                        |                       |                  |                  |                     |
| Reactant                                                                           | 1.64              | 2.11                   | 2.14                   | 2.13                   | 2.11                   | 2.08                  | 5.21             | 1.10             | 138.04              |
| Transition state                                                                   | 1.75              | 2.12                   | 2.14                   | 2.15                   | 2.10                   | 2.08                  | 1.35             | 1.28             | 145.29              |
| Intermediate                                                                       | 1.82              | 2.11                   | 2.14                   | 2.15                   | 2.10                   | 2.02                  | 0.98             | 2.95             | 120.49              |
| <b>Quintet</b>                                                                     |                   |                        |                        |                        |                        |                       |                  |                  |                     |
| Reactant                                                                           | 1.65              | 2.16                   | 2.27                   | 2.27                   | 2.15                   | 2.07                  | 2.57             | 1.10             | 169.42              |
| Transition state                                                                   | 1.70              | 2.20                   | 2.26                   | 2.25                   | 2.19                   | 2.20                  | 1.59             | 1.17             | 174.78              |
| Intermediate                                                                       | 1.80              | 2.22                   | 2.25                   | 2.25                   | 2.20                   | 2.25                  | 0.98             | 2.20             | 173.05              |

## V. [(TMC)Fe<sup>III</sup>O<sub>2</sub>]<sup>2+</sup> (4)

### [(TMC)Fe<sup>III</sup>O<sub>2</sub>]<sup>2+</sup> (4) with no substrates

Table SV-1. Valence electron configurations

|                                | $d_{xy}$ | $d_{xz}$ | $d_{yz}$ | $d_{z^2}$ | $d_{x^2-y^2}$ | ${}^{oo}\pi_{xy}^*$ | ${}^{oo}\pi_{xz}^*$ |
|--------------------------------|----------|----------|----------|-----------|---------------|---------------------|---------------------|
| Singlet endon                  | ↑↓       | ↑↓       | ↑        | ↑         | ---           | ↓                   | ↓                   |
| Triplet endon I                | ↑↓       | ↑        | ↑        | ↑         | ---           | ↓                   | ↑↓                  |
| Triplet endon II               | ↑↓       | ↑        | ↑        | ↑         | ---           | ↑↓                  | ↓                   |
| Triplet sideon                 | ↑↓       | ↑        | ↑        | ↑         | ---           | ↓                   | ↑↓                  |
| Quintet endon I                | ↑        | ↑        | ↑        | ↑         | ↑             | ↓                   | ↑↓                  |
| Quintet endon II               | ↑        | ↑        | ↑        | ↑         | ↑             | ↑↓                  | ↓                   |
| Quintet endon III              | ↑↓       | ↑        | ↑        | ↑         | ---           | ↑                   | ↑↓                  |
| Quintet sideon I               | ↑        | ↑        | ↑        | ↑         | ↑             | ↓                   | ↑↓                  |
| Quintet sideon II              | ↑        | ↑        | ↑        | ↑         | ↑             | ↑↓                  | ↓                   |
| Quintet sideon III             | ↑↓       | ↑        | ↑        | ↑         | ---           | ↑                   | ↑↓                  |
| Septet sideon                  | ↑        | ↑        | ↑        | ↑         | ↑             | ↑                   | ↑↓                  |
| Septet O <sub>2</sub> -unbound | ↑        | ↑        | ↑↓       | ↑         | ↑             | ↑                   | ↑                   |

Table SV-2. Valence orbitals (natural orbitals and their occupation numbers)

#### Singlet

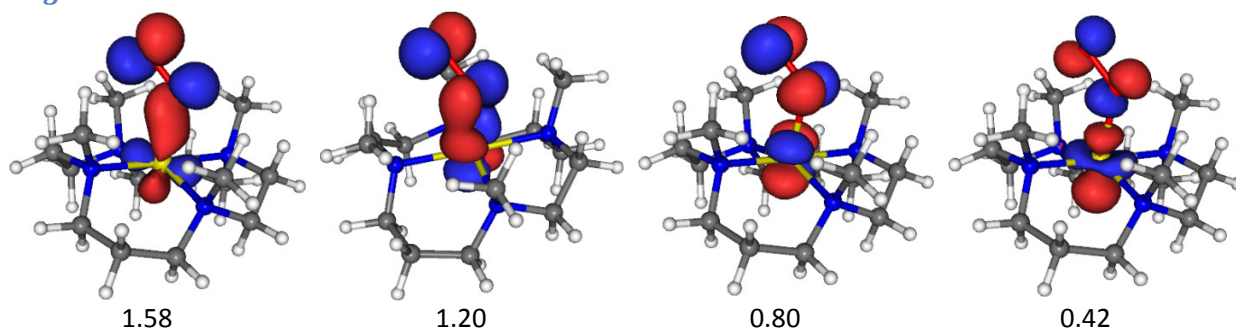

#### Triplet I

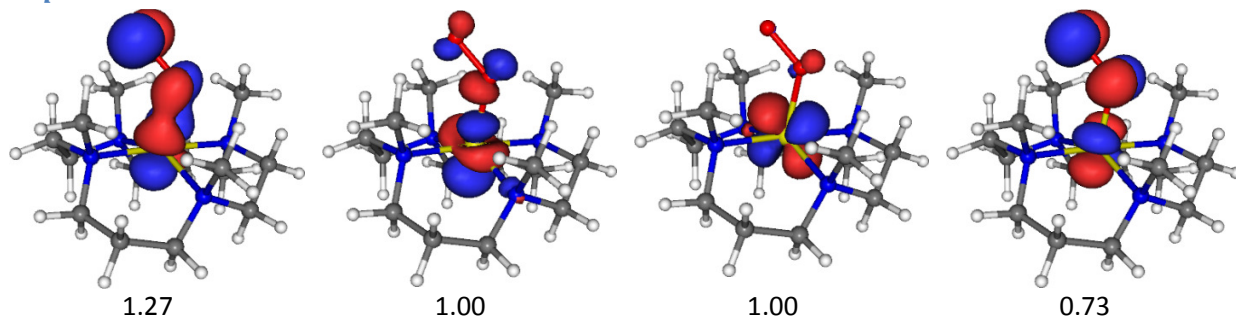

*Triplet II*

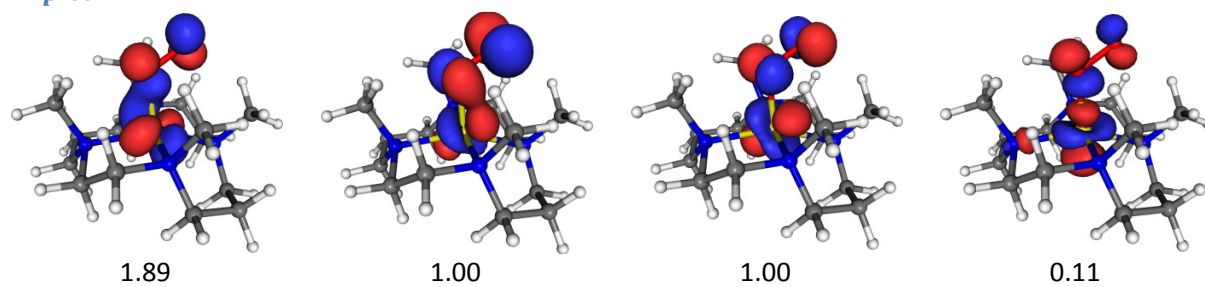

*Triplet sideon*

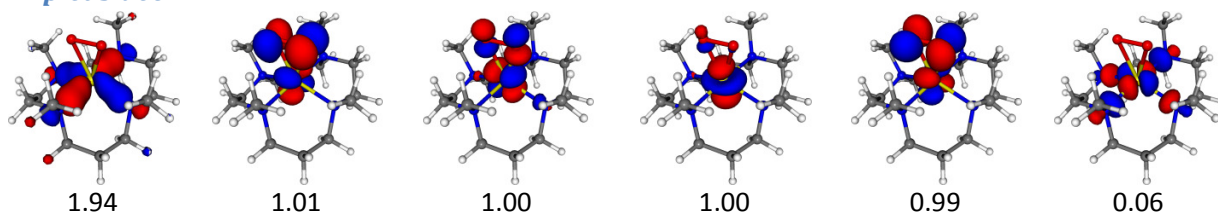

*Quintet I*

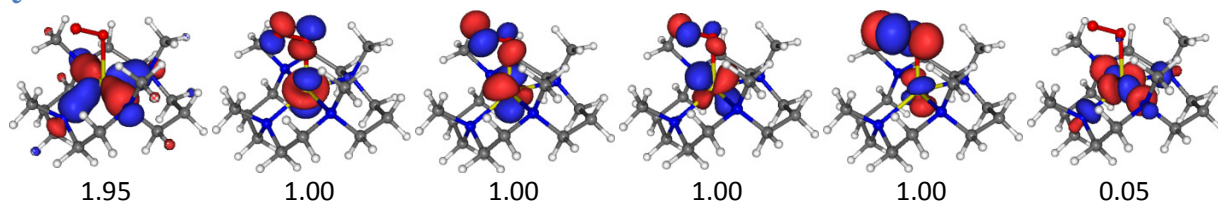

*Quintet II*

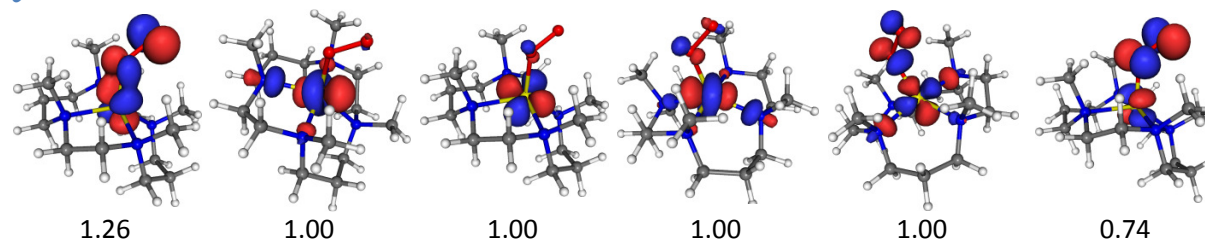

*Quintet III*

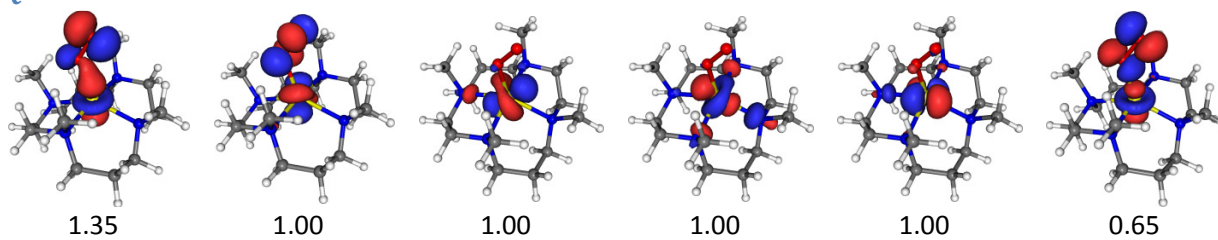

*Quintet-sideon I*

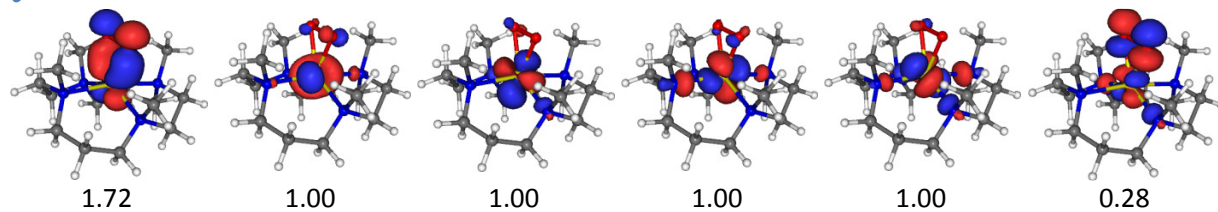

*Quintet-sideon II*

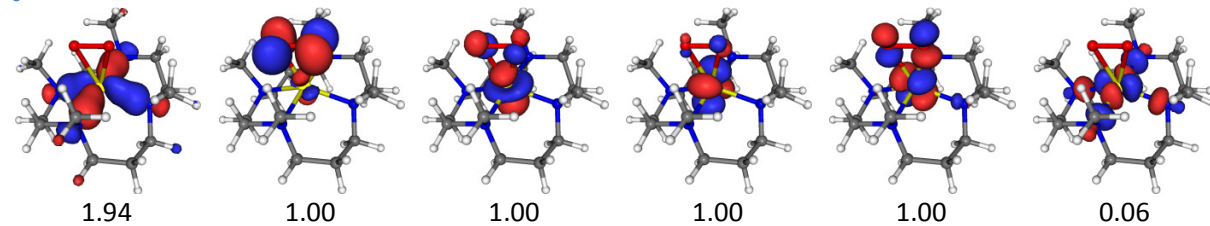

*Quintet-sideon III*

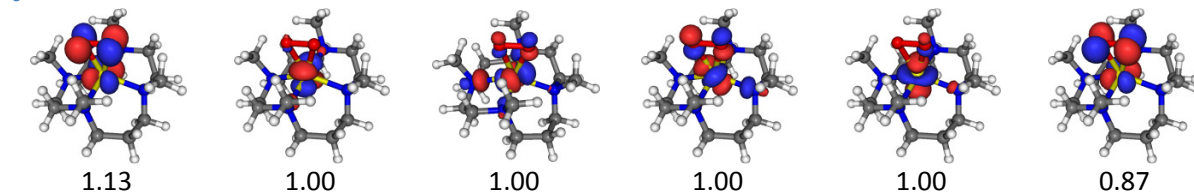

*Septet O<sub>2</sub>-bound*

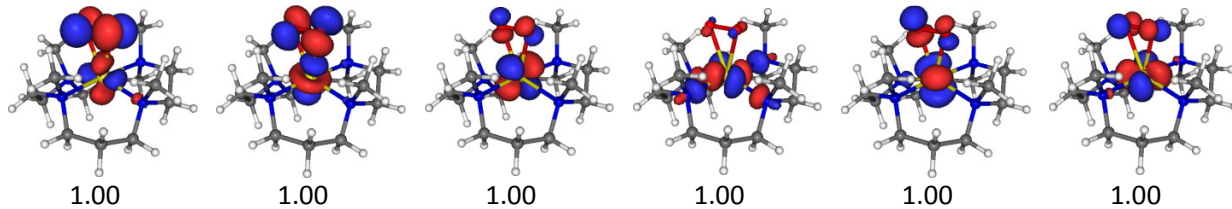

*Septet O<sub>2</sub>-unbound*

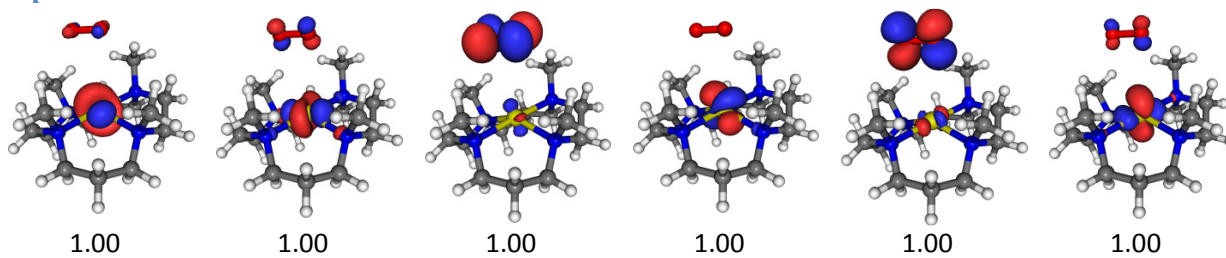

*Singlet-inverted*

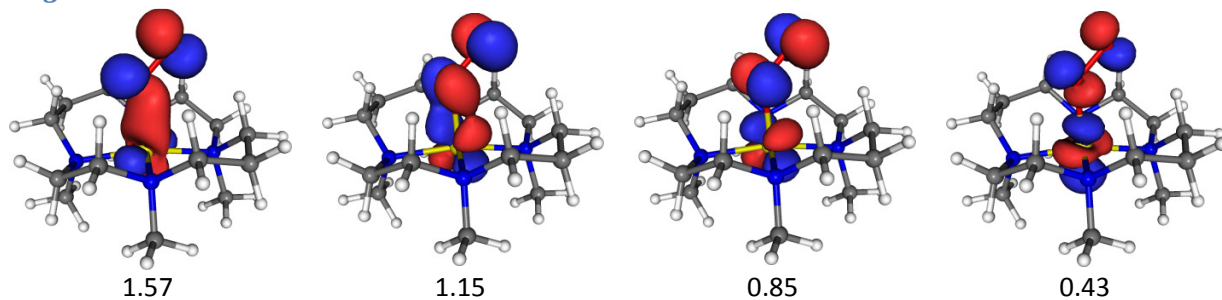

*Triplet-inverted*

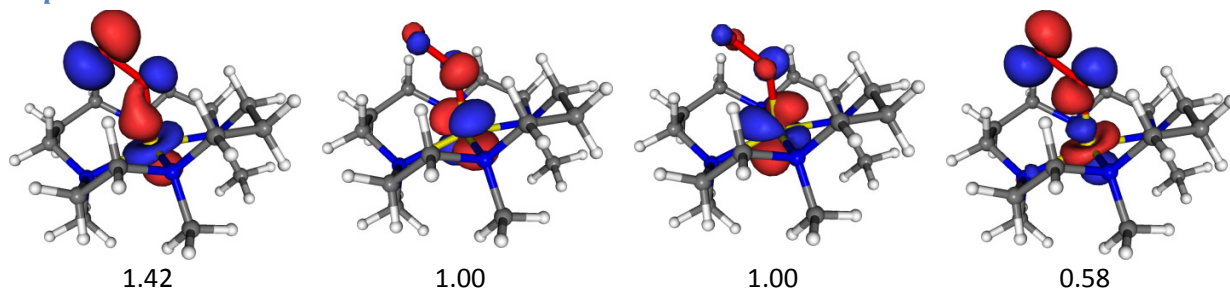

*Quintet-inverted I*

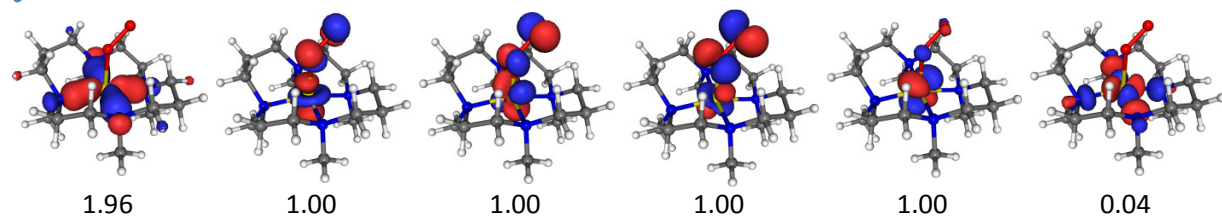

*Quintet-inverted II*

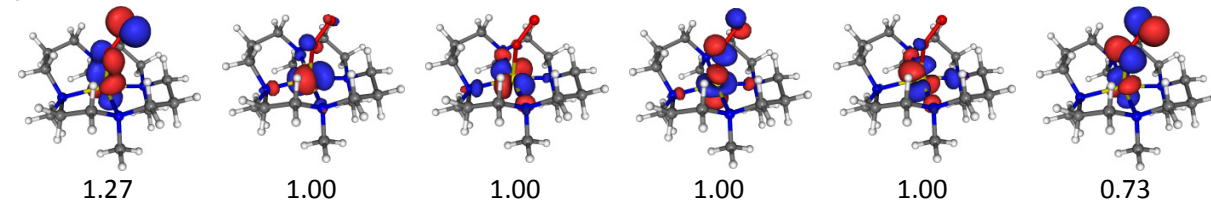

*Quintet-inverted-sideon*

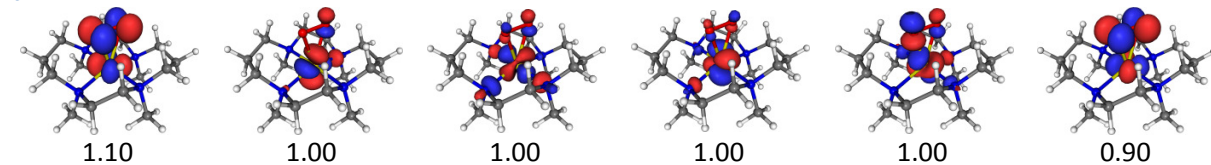

### Septet-inverted-sideon

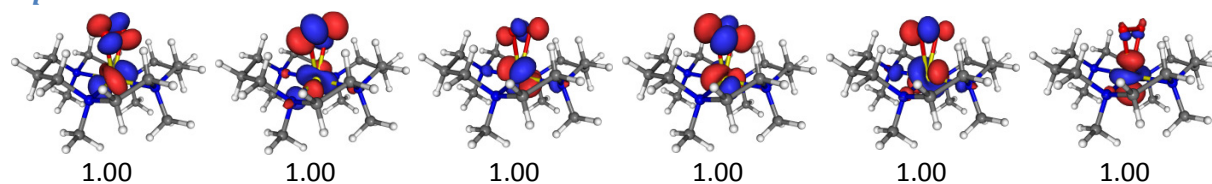

**Table SV-3. Relative energies (kcal/mol)**

These energies are not used in the main text, but rather, the energies in Table SV-6 is used.

|                                     | $\Delta\text{lacvp}$ | $\Delta\text{lacv3p}^{*+}$ | $\Delta E^a$ | $\Delta Z_0$ | $\Delta E_{\text{thermal}}^b$ | $-\Delta S^b$ | Dispersion   | $\Delta G^c$ |
|-------------------------------------|----------------------|----------------------------|--------------|--------------|-------------------------------|---------------|--------------|--------------|
| Singlet                             | 11.27                | +6.00                      | <b>17.27</b> | +2.18        | -0.92                         | +4.72         | -4.59        | <b>18.67</b> |
| Triplet I                           | 12.02                | +7.26                      | <b>19.28</b> | +1.76        | -0.78                         | +3.64         | -4.77        | <b>19.14</b> |
| Triplet II                          | 18.17                | +7.33                      | <b>25.50</b> | +2.23        | -0.98                         | +4.19         | -5.49        | <b>25.44</b> |
| Triplet sideon                      | 14.63                | +7.18                      | <b>21.81</b> | +2.58        | -1.23                         | +5.05         | -5.38        | <b>22.84</b> |
| Quintet I                           | 11.28                | +7.22                      | <b>18.50</b> | +2.47        | -1.10                         | +4.30         | -4.27        | <b>19.90</b> |
| Quintet II                          | 12.15                | +1.44                      | <b>13.59</b> | +0.63        | -0.49                         | +2.38         | -2.12        | <b>14.00</b> |
| Quintet III                         | 12.18                | +1.37                      | <b>13.54</b> | +0.67        | -0.57                         | +2.70         | -2.06        | <b>14.28</b> |
| Quintet sideon I                    | 20.90                | +0.87                      | <b>21.76</b> | +0.82        | -0.63                         | +3.25         | -4.28        | <b>20.93</b> |
| Quintet sideon II                   | 9.76                 | +7.14                      | <b>16.91</b> | +2.04        | -1.00                         | +4.25         | -5.35        | <b>16.84</b> |
| Quintet sideon III                  | 12.43                | +1.82                      | <b>14.24</b> | +0.94        | -0.67                         | +3.38         | -3.63        | <b>14.26</b> |
| Septet O <sub>2</sub> -bound        | 7.34                 | +2.24                      | <b>9.58</b>  | +0.97        | -0.69                         | +3.22         | -3.53        | <b>9.54</b>  |
| <b>Septet O<sub>2</sub>-unbound</b> | <b>0.00</b>          | <b>+0.00</b>               | <b>0.00</b>  | <b>+0.00</b> | <b>+0.00</b>                  | <b>+0.00</b>  | <b>+0.00</b> | <b>0.00</b>  |
| Singlet-inverted <sup>d</sup>       | 13.63                | +7.52                      | <b>21.15</b> | +2.27        | -0.90                         | +4.68         | -6.23        | <b>20.96</b> |
| Triplet-inverted <sup>d</sup>       | 15.85                | +9.11                      | <b>24.96</b> | +2.51        | -1.09                         | +4.38         | -6.45        | <b>24.31</b> |
| Quintet-inverted I <sup>d</sup>     | 12.67                | +9.32                      | <b>21.99</b> | +2.26        | -0.97                         | +4.08         | -6.35        | <b>21.01</b> |
| Quintet-inverted II <sup>d</sup>    | 18.60                | +4.03                      | <b>22.63</b> | +0.67        | -0.54                         | +2.91         | -4.62        | <b>21.06</b> |
| Quintet-inv-sideon <sup>d</sup>     | 22.69                | +3.55                      | <b>26.24</b> | +0.82        | -0.55                         | +2.78         | -4.60        | <b>24.69</b> |
| Septet-inv-sideon <sup>d</sup>      | 17.39                | +3.67                      | <b>21.06</b> | +0.97        | -0.66                         | +3.10         | -4.50        | <b>19.97</b> |

<sup>a</sup> Sum of the previous two columns. <sup>b</sup> T=298.15 K. <sup>c</sup>  $\Delta G$ =Sum of the previous five columns. <sup>d</sup> The four ligand methyl groups are pointing in the opposite direction as the Fe-O vector.

**Table SV-4. Mulliken spin density distribution**

|                                  | Fe   | O <sub>inner</sub> | O <sub>outer</sub> | 4 x ligated N | Rest  |
|----------------------------------|------|--------------------|--------------------|---------------|-------|
| Singlet                          | 1.76 | -0.80              | -0.91              | -0.10         | 0.05  |
| Triplet I                        | 3.15 | -0.18              | -0.59              | -0.41         | 0.04  |
| Triplet II                       | 1.40 | 0.17               | 0.58               | -0.17         | 0.01  |
| Triplet sideon                   | 3.18 | -0.36              | -0.38              | -0.44         | 0.01  |
| Quintet I                        | 3.04 | 0.56               | 0.80               | -0.42         | 0.02  |
| Quintet II                       | 4.28 | -0.09              | -0.54              | 0.23          | 0.12  |
| Quintet III                      | 4.08 | 0.01               | -0.46              | 0.27          | 0.10  |
| Quintet sideon I                 | 4.11 | -0.27              | -0.26              | 0.35          | 0.07  |
| Quintet sideon II                | 3.12 | 0.67               | 0.67               | -0.42         | -0.04 |
| Quintet sideon III               | 4.27 | -0.32              | -0.32              | 0.27          | 0.10  |
| Septet O <sub>2</sub> -bound     | 4.23 | 0.73               | 0.73               | 0.22          | 0.08  |
| Septet O <sub>2</sub> -unbound   | 3.73 | 1.00               | 1.00               | 0.07          | 0.20  |
| Singlet-inverted <sup>a</sup>    | 1.78 | -0.80              | -0.90              | -0.13         | 0.05  |
| Triplet-inverted <sup>a</sup>    | 2.95 | -0.10              | -0.55              | -0.30         | 0.00  |
| Quintet-inverted I <sup>a</sup>  | 3.19 | 0.60               | 0.75               | -0.50         | -0.04 |
| Quintet-inverted II <sup>a</sup> | 4.25 | -0.10              | -0.55              | 0.29          | 0.11  |
| Quintet-inv-sideon <sup>a</sup>  | 4.18 | -0.33              | -0.31              | 0.38          | 0.08  |
| Septet-inv-sideon <sup>a</sup>   | 4.16 | 0.74               | 0.74               | 0.24          | 0.13  |

<sup>a</sup> The four ligand methyl groups are pointing in the opposite direction as the Fe-O vector.

**Table SV-5. Geometries (Å and °)**

|                                  | D(Fe-O) | D(O-O) | D(Fe-N <sub>eq1</sub> ) | D(Fe-N <sub>eq2</sub> ) | D(Fe-N <sub>eq3</sub> ) | D(Fe-N <sub>eq4</sub> ) | A(Fe-O-O) |
|----------------------------------|---------|--------|-------------------------|-------------------------|-------------------------|-------------------------|-----------|
| Singlet                          | 2.07    | 1.28   | 2.10                    | 2.13                    | 2.12                    | 2.10                    | 125.73    |
| Triplet I                        | 1.97    | 1.36   | 2.12                    | 2.14                    | 2.12                    | 2.13                    | 123.57    |
| Triplet II                       | 1.91    | 1.34   | 2.11                    | 2.10                    | 2.12                    | 2.09                    | 114.68    |
| Triplet sideon                   | 2.17    | 1.38   | 2.14                    | 2.14                    | 2.12                    | 2.15                    | 71.96     |
| Quintet I                        | 2.13    | 1.34   | 2.12                    | 2.12                    | 2.13                    | 2.15                    | 113.24    |
| Quintet II                       | 2.02    | 1.34   | 2.20                    | 2.23                    | 2.25                    | 2.22                    | 119.29    |
| Quintet III                      | 1.95    | 1.32   | 2.22                    | 2.23                    | 2.25                    | 2.19                    | 131.69    |
| Quintet sideon I                 | 2.00    | 1.41   | 2.19                    | 2.24                    | 2.22                    | 2.19                    | 69.13     |
| Quintet sideon II                | 2.16    | 1.37   | 2.14                    | 2.14                    | 2.12                    | 2.14                    | 71.78     |
| Quintet sideon III               | 2.15    | 1.37   | 2.19                    | 2.23                    | 2.20                    | 2.20                    | 71.66     |
| Septet O <sub>2</sub> -bound     | 2.18    | 1.35   | 2.20                    | 2.23                    | 2.20                    | 2.20                    | 72.10     |
| Septet O <sub>2</sub> -unbound   | 3.61    | 1.25   | 2.19                    | 2.22                    | 2.24                    | 2.19                    | 79.59     |
| Singlet-inverted <sup>a</sup>    | 2.14    | 1.29   | 2.08                    | 2.08                    | 2.09                    | 2.08                    | 127.62    |
| Triplet-inverted <sup>a</sup>    | 1.93    | 1.36   | 2.09                    | 2.10                    | 2.12                    | 2.08                    | 134.47    |
| Quintet-inverted I <sup>a</sup>  | 2.15    | 1.34   | 2.07                    | 2.09                    | 2.11                    | 2.07                    | 128.45    |
| Quintet-inverted II <sup>a</sup> | 2.00    | 1.34   | 2.17                    | 2.16                    | 2.17                    | 2.18                    | 135.41    |
| Quintet-inv-sideon <sup>a</sup>  | 2.20    | 1.36   | 2.16                    | 2.18                    | 2.21                    | 2.15                    | 70.36     |
| Septet-inv-sideon <sup>a</sup>   | 2.23    | 1.34   | 2.16                    | 2.18                    | 2.20                    | 2.16                    | 72.08     |

<sup>a</sup> The four ligand methyl groups are pointing in the opposite direction as the Fe-O vector.



## Reactivity with 1,4-cyclohexadiene

Table SV-6. Relative energies (kcal/mol)

|                                                      | $\Delta\text{lacvp}$ | $\Delta\text{lacv3p}^{*+}$ | $\Delta E^a$ | $\Delta Z_0$ | $\Delta E_{\text{Thermal}}^b$ | $-\text{T}\Delta S^b$ | $\Delta_{\text{Disp}}$ | $\Delta G^c$  |
|------------------------------------------------------|----------------------|----------------------------|--------------|--------------|-------------------------------|-----------------------|------------------------|---------------|
| <b>Singlet</b>                                       |                      |                            |              |              |                               |                       |                        |               |
| Reactants, complexed                                 | 10.98                | +6.28                      | <b>17.26</b> | +2.43        | -1.04                         | +6.16                 | -6.05                  | <b>18.75</b>  |
| Transition state                                     | 21.78                | +13.42                     | <b>35.20</b> | -1.55        | -1.62                         | +8.52                 | -7.23                  | <b>33.30</b>  |
| Intermediate                                         | 9.08                 | +10.70                     | <b>19.78</b> | +2.54        | -1.68                         | +8.49                 | -7.99                  | <b>21.14</b>  |
| <b>Triplet</b>                                       |                      |                            |              |              |                               |                       |                        |               |
| Reactants, complexed, T1                             | 11.32                | +7.65                      | <b>18.98</b> | +2.54        | -1.15                         | +5.41                 | -6.04                  | <b>19.74</b>  |
| Transition state, T1                                 | 17.94                | +12.30                     | <b>30.24</b> | -0.43        | -1.93                         | +8.72                 | -8.00                  | <b>28.60</b>  |
| Intermediate, T1                                     | 3.74                 | +9.47                      | <b>13.21</b> | +1.37        | -1.23                         | +6.40                 | -7.18                  | <b>12.57</b>  |
| <b>Quintet</b>                                       |                      |                            |              |              |                               |                       |                        |               |
| Reactants, complexed, Q1                             | 10.86                | +7.93                      | <b>18.79</b> | +2.48        | -1.08                         | +4.63                 | -5.50                  | <b>19.31</b>  |
| Transition state, Q1                                 | 19.58                | +12.47                     | <b>32.05</b> | -0.67        | -1.88                         | +8.24                 | -7.82                  | <b>29.91</b>  |
| Intermediate, Q1                                     | -14.87               | +10.46                     | <b>-4.41</b> | +0.04        | -0.60                         | +5.05                 | -3.74                  | <b>-3.67</b>  |
| Reactants, complexed, QII                            | 11.59                | +1.61                      | <b>13.19</b> | +1.54        | -0.98                         | +4.36                 | -2.12                  | <b>15.99</b>  |
| Reactants, complexed, QIII                           | 11.69                | +4.02                      | <b>15.72</b> | -0.07        | -0.88                         | +5.65                 | -4.00                  | <b>16.41</b>  |
| Transition state, QIII                               | 12.24                | +7.64                      | <b>19.88</b> | -1.94        | -1.53                         | +7.37                 | -4.66                  | <b>19.12</b>  |
| Intermediate, QIII                                   | -13.00               | +9.47                      | <b>-3.53</b> | +0.48        | -0.71                         | +5.01                 | -4.11                  | <b>-2.86</b>  |
| Reactants, complexed, QSIII                          | 12.23                | +1.41                      | <b>13.64</b> | +1.48        | -0.95                         | +4.55                 | -3.18                  | <b>15.54</b>  |
| <b>Transition state, QSIII</b>                       | <b>14.14</b>         | <b>+5.56</b>               | <b>19.70</b> | <b>-0.06</b> | <b>-1.61</b>                  | <b>+7.96</b>          | <b>-6.38</b>           | <b>19.59</b>  |
| Intermediate, QSIII                                  | -15.84               | +10.70                     | <b>-5.14</b> | +0.32        | -0.66                         | +4.95                 | -4.64                  | <b>-5.17</b>  |
| <b>Septet</b>                                        |                      |                            |              |              |                               |                       |                        |               |
| Reactants, comp, O <sub>2</sub> -bound               | 7.04                 | +2.12                      | <b>9.16</b>  | +1.67        | -1.01                         | +4.83                 | -4.42                  | <b>10.24</b>  |
| Transition state, O <sub>2</sub> -bound              | 14.02                | +8.32                      | <b>22.34</b> | -1.63        | -1.75                         | +7.91                 | -6.56                  | <b>20.31</b>  |
| Intermediate, O <sub>2</sub> -bound                  | 1.30                 | +4.47                      | <b>5.77</b>  | -0.01        | -0.81                         | +4.38                 | -4.14                  | <b>5.19</b>   |
| Reactants, comp, O <sub>2</sub> -unb                 | 0.00                 | +0.00                      | <b>0.00</b>  | +0.00        | +0.00                         | +0.00                 | +0.00                  | <b>0.00</b>   |
| Transition state, O <sub>2</sub> -unb                | 15.74                | +10.26                     | <b>26.00</b> | -2.86        | -1.29                         | +6.13                 | -3.55                  | <b>24.43</b>  |
| Intermediate, O <sub>2</sub> -unb                    | 0.48                 | +4.30                      | <b>4.78</b>  | +0.34        | -1.07                         | +5.47                 | -4.59                  | <b>4.93</b>   |
| <b>With 2x[CF<sub>3</sub>SO<sub>3</sub>]</b>         |                      |                            |              |              |                               |                       |                        |               |
| <b>Reactants, complexd, Septet O<sub>2</sub>-unb</b> | <b>0.00</b>          | <b>+0.00</b>               | <b>0.00</b>  | <b>+0.00</b> | <b>+0.00</b>                  | <b>+0.00</b>          | <b>+0.00</b>           | <b>0.00</b>   |
| Reactants, complexd, Septet O <sub>2</sub> -bound    | 6.28                 | +1.69                      | <b>7.97</b>  | +0.85        | -0.59                         | +2.44                 | -3.09                  | <b>7.59</b>   |
| Reactants, complexed, QSIII                          | 11.41                | +1.21                      | <b>12.61</b> | +1.04        | -1.30                         | +5.58                 | -3.85                  | <b>14.08</b>  |
| Transition state, QSIII                              | 15.04                | +4.86                      | <b>19.90</b> | -0.67        | -1.22                         | +4.61                 | -6.85                  | <b>15.76</b>  |
| Intermediate, QSIII                                  | -20.25               | +11.15                     | <b>-9.10</b> | -0.50        | -0.63                         | +3.58                 | -4.11                  | <b>-10.76</b> |

<sup>a</sup> Sum of the previous two columns. <sup>b</sup> T=298.15 K. <sup>c</sup>  $\Delta G$ = Sum of the previous five columns. This value is however deemed unreliable and is not used.

**Table SV-7. Mulliken spin density distribution**

|                                                          | Fe   | O <sub>inner</sub> | O <sub>outer</sub> | 4 x ligated N | Substrate         | Rest |
|----------------------------------------------------------|------|--------------------|--------------------|---------------|-------------------|------|
| <b>Singlet</b>                                           |      |                    |                    |               |                   |      |
| Reactants, complexed                                     | 1.65 | -0.78              | -0.90              | -0.06         | -0.01             | 0.09 |
| Transition state                                         | 1.91 | -0.55              | -0.59              | -0.10         | -0.72             | 0.06 |
| Intermediate                                             | 1.02 | 0.07               | 0.00               | -0.11         | -0.99             | 0.02 |
| <b>Triplet</b>                                           |      |                    |                    |               |                   |      |
| Reactants, complexed, T1                                 | 3.18 | -0.19              | -0.59              | -0.43         | 0.00              | 0.03 |
| Transition state, T1                                     | 2.90 | 0.20               | -0.32              | -0.34         | -0.46             | 0.01 |
| Intermediate, T1                                         | 3.00 | 0.27               | 0.04               | -0.36         | -0.98             | 0.02 |
| <b>Quintet</b>                                           |      |                    |                    |               |                   |      |
| Reactants, complexed, Q1                                 | 3.08 | 0.60               | 0.76               | -0.48         | 0.00              | 0.04 |
| Transition state, Q1                                     | 2.87 | 0.40               | 0.54               | -0.31         | 0.49              | 0.01 |
| Intermediate, Q1                                         | 3.85 | 0.10               | 0.02               | -0.04         | 0.00 <sup>a</sup> | 0.06 |
| Reactants, complexed, QII                                | 4.29 | -0.09              | -0.56              | 0.24          | 0.00              | 0.12 |
| Reactants, complexed, QIII                               | 4.06 | 0.10               | -0.29              | 0.19          | -0.16             | 0.09 |
| Transition state, QIII                                   | 4.07 | 0.35               | -0.09              | 0.14          | -0.54             | 0.08 |
| Intermediate, QIII                                       | 3.83 | 0.09               | 0.03               | -0.03         | 0.01 <sup>a</sup> | 0.07 |
| Reactants, complexed, QSIII                              | 4.30 | -0.32              | -0.33              | 0.27          | 0.00              | 0.09 |
| Transition state, QSIII                                  | 4.26 | -0.04              | -0.17              | 0.22          | -0.33             | 0.07 |
| Intermediate, QSIII                                      | 3.82 | 0.10               | 0.03               | -0.02         | 0.00 <sup>a</sup> | 0.07 |
| <b>Septet</b>                                            |      |                    |                    |               |                   |      |
| Reactants, comp, O <sub>2</sub> -bound                   | 4.24 | 0.74               | 0.73               | 0.21          | 0.00              | 0.07 |
| Transition state, O <sub>2</sub> -bound                  | 4.26 | 0.41               | 0.45               | 0.18          | 0.64              | 0.06 |
| Intermediate, O <sub>2</sub> -bound                      | 4.22 | 0.35               | 0.09               | 0.26          | 0.99              | 0.10 |
| Reactants, comp, O <sub>2</sub> -unb                     | 3.69 | 1.00               | 0.99               | 0.10          | 0.01              | 0.21 |
| Transition state, O <sub>2</sub> -unb                    | 3.83 | 0.59               | 0.66               | 0.05          | 0.74              | 0.13 |
| Intermediate, O <sub>2</sub> -unb                        | 4.21 | 0.36               | 0.11               | 0.24          | 0.99              | 0.09 |
| <b>With 2x[CF<sub>3</sub>SO<sub>3</sub>]<sup>-</sup></b> |      |                    |                    |               |                   |      |
| Reactants, complexed, Septet O <sub>2</sub> -unb         | 3.53 | 1.00               | 1.01               | 0.21          | 0.00              | 0.24 |
| Reactants, complexed, Septet O <sub>2</sub> -bound       | 4.36 | 0.72               | 0.73               | 0.13          | 0.00              | 0.06 |
| Reactants, complexed, QSIII                              | 4.38 | -0.31              | -0.34              | 0.19          | 0.00              | 0.08 |
| Transition state, QSIII                                  | 4.28 | -0.03              | -0.21              | 0.19          | -0.32             | 0.09 |
| Intermediate, QSIII                                      | 3.88 | 0.13               | 0.03               | -0.10         | 0.00 <sup>a</sup> | 0.06 |

<sup>a</sup> No spin on the substrate after the reaction indicate that a hydride, rather than a hydrogen atom, transfer has occurred. This could be self-interaction errors within DFT, or a real effect due to the specific substrate used. As the spin density distribution at the transition states are characteristic of hydrogen atom transfers, the state of the intermediates are immaterial for the barrier discussions.

**Table SV-8. Geometries (Å and °)**

|                                                          | D <sub>Fe-O</sub> | D <sub>O-O</sub> | D <sub>Fe-N(eq1)</sub> | D <sub>Fe-N(eq2)</sub> | D <sub>Fe-N(eq3)</sub> | D <sub>Fe-N(eq4)</sub> | D <sub>O-H</sub> | D <sub>H-C</sub> | A <sub>O-O-H</sub> |
|----------------------------------------------------------|-------------------|------------------|------------------------|------------------------|------------------------|------------------------|------------------|------------------|--------------------|
| <b>Singlet</b>                                           |                   |                  |                        |                        |                        |                        |                  |                  |                    |
| Reactants, complexed                                     | 2.05              | 1.29             | 2.10                   | 2.13                   | 2.12                   | 2.10                   | 2.76             | 1.10             | 116.05             |
| Transition state                                         | 2.10              | 1.37             | 2.13                   | 2.12                   | 2.11                   | 2.12                   | 1.27             | 1.37             | 108.57             |
| Intermediate                                             | 1.78              | 1.50             | 2.10                   | 2.12                   | 2.10                   | 2.11                   | 1.00             | 2.15             | 101.36             |
| <b>Triplet</b>                                           |                   |                  |                        |                        |                        |                        |                  |                  |                    |
| Reactants, complexed, T1                                 | 1.96              | 1.36             | 2.14                   | 2.14                   | 2.12                   | 2.11                   | 2.69             | 1.10             | 93.43              |
| Transition state, T1                                     | 1.88              | 1.43             | 2.13                   | 2.12                   | 2.12                   | 2.14                   | 1.42             | 1.23             | 104.96             |
| Intermediate, T1                                         | 1.89              | 1.50             | 2.13                   | 2.12                   | 2.12                   | 2.15                   | 1.00             | 2.12             | 101.13             |
| <b>Quintet</b>                                           |                   |                  |                        |                        |                        |                        |                  |                  |                    |
| Reactants, complexed, Q1                                 | 2.10              | 1.34             | 2.10                   | 2.13                   | 2.12                   | 2.10                   | 2.68             | 1.10             | 97.15              |
| Transition state, Q1                                     | 1.91              | 1.41             | 2.14                   | 2.12                   | 2.11                   | 2.14                   | 1.44             | 1.22             | 103.47             |
| Intermediate, Q1                                         | 1.98              | 1.54             | 2.24                   | 2.31                   | 2.30                   | 2.24                   | 0.98             | 4.67             | 100.90             |
| Reactants, complexed, QII                                | 1.99              | 1.35             | 2.20                   | 2.26                   | 2.22                   | 2.21                   | 2.63             | 1.10             | 106.85             |
| Reactants, complexed, QIII                               | 2.00              | 1.33             | 2.22                   | 2.24                   | 2.25                   | 2.19                   | 1.87             | 1.13             | 107.04             |
| Transition state, QIII                                   | 1.96              | 1.38             | 2.23                   | 2.25                   | 2.26                   | 2.20                   | 1.46             | 1.23             | 105.48             |
| Intermediate, QIII                                       | 1.97              | 1.52             | 2.23                   | 2.31                   | 2.30                   | 2.25                   | 0.98             | 2.87             | 100.71             |
| Reactants, complexed, QSIII                              | 2.15              | 1.37             | 2.22                   | 2.22                   | 2.21                   | 2.20                   | 2.75             | 1.10             | 104.75             |
| Transition state, QSIII                                  | 2.04              | 1.43             | 2.23                   | 2.22                   | 2.23                   | 2.21                   | 1.77             | 1.14             | 106.12             |
| Intermediate, QSIII                                      | 1.99              | 1.54             | 2.25                   | 2.29                   | 2.29                   | 2.25                   | 0.98             | 3.68             | 101.37             |
| <b>Septet</b>                                            |                   |                  |                        |                        |                        |                        |                  |                  |                    |
| Reactants, comp, O <sub>2</sub> -bound                   | 2.17              | 1.35             | 2.21                   | 2.21                   | 2.21                   | 2.21                   | 3.11             | 1.10             | 73.48              |
| Transition state, O <sub>2</sub> -bound                  | 1.96              | 1.47             | 2.23                   | 2.24                   | 2.25                   | 2.25                   | 1.41             | 1.26             | 108.44             |
| Intermediate, O <sub>2</sub> -bound                      | 1.88              | 1.48             | 2.20                   | 2.25                   | 2.24                   | 2.18                   | 1.00             | 2.10             | 102.53             |
| Reactants, comp, O <sub>2</sub> -unb                     | 3.57              | 1.26             | 2.19                   | 2.23                   | 2.23                   | 2.18                   | 2.77             | 1.10             | 91.23              |
| Transition state, O <sub>2</sub> -unb                    | 2.23              | 1.36             | 2.23                   | 2.21                   | 2.22                   | 2.23                   | 1.28             | 1.36             | 105.89             |
| Intermediate, O <sub>2</sub> -unb                        | 1.88              | 1.47             | 2.19                   | 2.26                   | 2.25                   | 2.18                   | 1.00             | 2.10             | 101.49             |
| <b>With 2x[CF<sub>3</sub>SO<sub>3</sub>]<sup>-</sup></b> |                   |                  |                        |                        |                        |                        |                  |                  |                    |
| Reactants, cmpl, Septet O <sub>2</sub> -unb              | 3.60              | 1.25             | 2.19                   | 2.22                   | 2.23                   | 2.20                   | 2.80             | 1.10             | 119.03             |
| Reactants, cmpl, Septet O <sub>2</sub> -bound            | 2.16              | 1.36             | 2.21                   | 2.21                   | 2.21                   | 2.22                   | 4.39             | 1.10             | 106.75             |
| Reactants, complexed, QSIII                              | 2.13              | 1.37             | 2.21                   | 2.22                   | 2.21                   | 2.20                   | 3.38             | 1.10             | 112.39             |
| Transition state, QSIII                                  | 2.02              | 1.43             | 2.22                   | 2.22                   | 2.24                   | 2.22                   | 1.77             | 1.14             | 111.85             |
| Intermediate, QSIII                                      | 1.94              | 1.53             | 2.24                   | 2.32                   | 2.33                   | 2.25                   | 0.99             | 4.99             | 99.30              |

Figure S1. Functional dependence on the CHD C-H activation by 4.

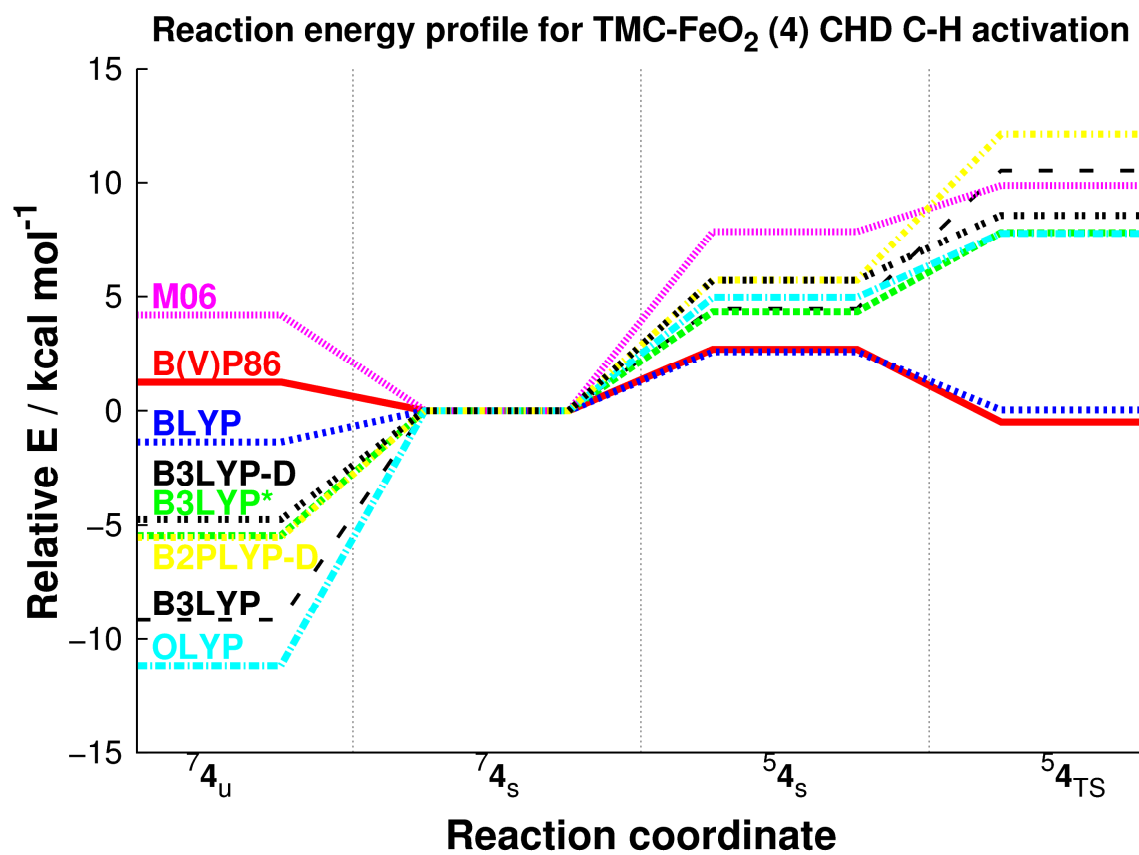

## Coordinates

The coordinates are in xyz-file format, with a comment field in the second line, with charge/multiplicity in parenthesis.

### [(N4Py)FeO]<sup>2+</sup> (1)

```

51
FeO (2/3)
Fe 6.13944 4.43470 4.89867
N 5.49937 2.48100 4.82551
N 6.67035 3.89321 6.73618
N 7.84076 3.60192 4.29395
N 4.29973 4.79054 5.51502
N 5.48034 4.49691 3.04016
O 6.67379 6.00010 4.96977
C 6.81677 4.69015 7.81483
C 7.17307 4.15048 5.02277
C 7.37185 2.77091 9.16591
C 7.21802 1.95186 8.03728
C 6.86806 2.54825 6.83183
C 6.72510 1.85406 5.48665
C 7.91531 2.28762 4.64614
C 9.01117 1.50603 4.30072
O 10.05471 2.10440 3.57873
C 9.96914 3.45577 3.22930
C 8.83884 4.18758 3.60042
C 3.77650 6.03345 5.65390
C 2.44940 6.21725 6.03144
C 1.64656 5.09361 6.26058
C 2.19535 3.81642 6.11375
C 3.53544 3.68850 5.74470
C 4.22943 2.35318 5.63330
C 5.30766 2.08710 3.38030
C 5.06532 3.30716 2.52668
C 4.49893 3.24013 1.25275
C 4.37622 4.41050 4.09817
C 4.82182 5.62419 1.03477
C 5.36769 5.63699 2.31524
H 6.65030 5.74761 7.66374
H 7.29050 4.80447 9.90678
H 6.74300 2.33317 1.11882
H 7.36457 0.88103 8.09639
H 6.64457 0.76919 5.57649
H 9.05010 0.46197 4.58394
H 10.92088 1.51933 3.29472
H 10.76258 3.94204 2.67711
H 8.71479 5.23440 3.36042
H 4.44755 6.85756 5.45598
H 2.05671 7.22009 6.13709
H 0.60826 5.20937 6.54706
H 1.59722 2.92985 6.28417
H 4.16360 2.28707 0.86270
H 3.93833 4.37565 -0.49208
H 4.74394 6.94805 0.47666
H 5.72336 6.54079 2.78995
H 3.57242 1.60405 5.18519
H 4.48129 1.99072 6.63463
H 4.48675 1.37172 3.29012
H 6.21026 1.57668 3.03098
    
```

```

C 4.72490 5.60333 0.90608
C 5.31349 5.68067 2.16521
H 6.78521 5.71896 7.88325
H 7.43855 4.63294 10.05511
H 7.73705 2.14634 10.11526
H 7.39291 0.82168 8.01812
H 6.60903 0.85562 5.55251
H 8.99808 0.43249 4.63617
H 10.93978 1.37086 3.36428
H 10.92025 3.78863 2.70821
H 8.93353 5.19517 3.33984
H 4.25314 6.96701 5.52797
H 1.81627 7.19644 6.10516
H 0.45840 5.10817 6.41270
H 1.57030 2.88508 6.16645
H 4.08145 2.25604 0.92030
H 3.79984 4.27382 -0.55245
H 4.61966 6.49646 0.30408
H 5.67367 6.61043 2.58472
H 3.65236 1.65326 5.24500
H 4.54605 2.15247 6.67142
H 4.52919 1.44001 3.34239
H 6.24156 1.69397 3.05024
    
```

```

H 8.24944 7.63453 9.74770
H 10.79024 7.33146 9.71406
H 10.00960 5.80704 9.39755
H 11.86669 6.19749 7.68424
H 11.02842 7.09286 5.59106

65
FeO + CHD TS (2/3)
Fe 6.16345 4.24193 4.85624
N 5.33109 2.37236 4.79125
N 6.59606 3.68265 6.71906
N 7.79151 3.23753 4.29877
N 4.34557 4.80402 5.40727
N 5.54607 4.35312 2.97815
O 6.80684 5.86741 4.88419
C 6.75319 4.46589 7.80673
C 6.97386 3.90216 9.06582
C 7.03152 2.51080 9.19236
C 6.86461 1.70421 8.05700
C 6.64642 2.32548 6.83266
C 6.47273 1.63331 5.49083
C 7.71868 1.92881 4.67172
C 8.71851 1.02046 4.34164
C 9.82083 1.47995 3.60642
C 9.88309 2.82340 3.22205
C 8.84354 3.68475 3.58081
C 3.94232 6.09311 5.50807
C 6.62801 6.41345 5.83959
C 1.71249 5.37823 6.06398
C 2.13831 4.05050 5.95802
C 3.47033 3.78798 5.63231
C 4.03693 2.38958 5.56879
C 5.12990 1.97821 3.34757
C 5.02972 3.20267 2.46956
C 4.49199 3.16864 1.18164
C 4.50232 4.33353 0.40823
C 5.04702 5.50768 0.94188
C 5.55961 5.48685 2.23681
H 6.70110 5.53378 7.64563
H 7.09507 4.54593 9.92728
H 7.19764 2.05511 10.16091
H 6.89456 0.62423 8.12599
H 6.28179 0.56303 5.59245
H 8.63681 -0.01626 4.64264
H 10.61403 0.79464 3.33350
H 10.71978 3.20349 2.65048
H 8.83131 4.72956 3.30335
H 4.70341 6.83698 5.31618
H 2.33097 7.45164 5.91402
H 6.08239 5.60055 6.31548
H 1.45230 3.22940 6.12674
H 4.07663 2.24602 0.79481
H 4.08938 4.32493 -0.59342
H 5.07051 6.42633 0.36996
H 5.98935 6.35504 2.71747
H 3.32058 1.69375 5.12508
H 4.23283 2.03502 6.58515
H 4.24210 1.34869 3.24880
H 5.98283 1.37289 3.02563
H 8.04089 6.21356 5.41190
C 9.09832 6.76409 5.77742
C 8.67279 7.88137 6.65218
C 8.94574 7.91486 7.97481
C 9.75608 6.85264 6.66896
C 10.27689 5.79267 7.73621
C 9.98891 5.77031 6.41623
H 9.43581 7.08691 4.78309
H 8.10550 6.87050 6.19314
H 8.60184 8.74813 8.58258
H 10.59836 7.31955 9.20856
H 9.15931 6.38746 9.47400
H 10.93472 5.04018 8.16406
H 10.41930 4.99852 5.78334

65
FeO+CHD Intermediate (2/3)
Fe 6.08891 4.18656 4.84125
N 5.28255 2.32839 4.75632
N 6.53423 3.62698 6.69823
N 7.73829 3.21406 4.29540
N 4.26956 4.74145 5.37391
N 5.48006 4.32909 2.96888
N 6.76087 5.87251 4.89550
C 6.69908 4.40585 7.78788
C 6.94053 3.83719 9.04072
C 7.00339 2.44528 9.15933
    
```

```

C 6.82504 1.64297 8.02235
C 6.59276 2.26900 6.80337
C 6.42464 1.58561 5.45559
C 7.67415 1.89892 4.64834
C 6.88792 1.00668 4.31880
C 9.79641 1.49060 3.60830
C 9.85165 2.84108 3.24882
C 8.79700 3.68539 3.60348
C 3.86319 6.02865 5.47112
C 2.54311 6.34151 5.78867
C 1.63009 5.30135 6.00038
C 2.06174 3.97474 5.89700
C 3.39831 3.71984 5.58648
C 9.80092 2.32794 5.52722
C 5.09005 1.94756 3.30465
C 4.97360 3.18249 2.44281
C 4.34462 3.16585 1.15556
C 4.43561 4.34532 0.40342
C 4.97188 5.51453 0.95622
C 5.48576 5.47625 2.25081
H 6.63324 5.47412 7.63406
H 7.07312 4.47751 9.90294
H 7.18354 1.98545 10.12338
H 6.86038 0.56287 8.08622
H 6.23608 0.51425 5.54553
H 8.61380 -0.03542 4.60243
H 10.60115 0.81835 3.33674
H 10.69435 3.23960 2.69916
H 8.77872 4.73471 3.34381
H 4.62690 6.77253 5.28932
H 2.23954 7.37788 5.86200
H 0.59616 5.51879 6.24053
H 1.37695 3.15084 6.05643
H 4.02590 2.24735 0.75225
H 4.02163 4.35106 -0.59783
H 4.98738 6.44257 0.39938
H 5.91116 6.33608 2.75021
H 3.27853 1.62181 5.07830
H 4.17778 1.67623 6.54428
H 4.21271 1.30523 3.98660
H 5.95412 1.36006 2.97969
H 7.63632 5.98278 5.32878
C 9.82578 6.97389 5.87926
C 9.17852 8.05695 6.54304
C 9.11562 8.12119 7.91272
C 9.73615 7.06689 8.79218
C 10.38332 5.94576 8.02098
C 10.41824 5.93044 6.64891
H 9.90548 6.96754 4.79703
H 8.73180 8.84798 5.94659
H 8.62078 8.95531 8.40234
H 10.47747 1.35275 9.47188
H 8.98033 6.66178 9.49220
H 10.84277 5.14393 8.59225
H 10.91032 5.11055 6.13243
    
```

```

65
FeO + CHD Reactant (2/5)
Fe 6.34876 4.06505 4.66101
N 5.22335 2.31956 4.76304
N 6.76482 3.43819 6.66482
N 7.82213 2.61983 4.15441
N 4.56222 4.92045 5.29262
N 5.62352 4.06952 2.70203
O 7.24123 5.44924 4.56883
C 7.14377 4.18429 7.72460
C 7.34160 3.59715 8.97734
C 7.13774 2.22186 9.12643
C 6.74440 1.45435 8.01966
C 5.68399 2.09792 6.79965
C 6.22396 1.41467 5.48546
C 7.48778 1.39274 4.63973
C 8.29040 0.27902 4.41666
C 9.46953 0.44590 3.67463
C 9.80638 1.71150 3.18351
C 8.95489 2.7891 3.43677
C 4.32120 6.25368 5.34444
C 3.06318 6.74493 5.68134
C 2.03446 6.83549 5.95862
C 2.29202 4.46201 5.90143
C 3.57681 4.02632 5.57123
C 3.96556 2.56908 5.57343
C 4.90606 1.83524 3.36181
C 4.89054 2.97283 2.37259
C 4.22814 2.89878 1.14604
C 4.34307 3.96475 0.24754
    
```

|                    |          |          |                                 |          |          |            |          |          |            |          |          |
|--------------------|----------|----------|---------------------------------|----------|----------|------------|----------|----------|------------|----------|----------|
| C 5.11384          | 5.08176  | 0.59410  | C 10.23293                      | 7.32572  | 8.35518  | C 8.34126  | 0.27218  | 4.60091  | H 6.91097  | 4.65337  | 9.91958  |
| C 5.74005          | 5.10707  | 1.83738  | C 10.80666                      | 7.35199  | 6.96331  | C 9.53867  | 0.52436  | 3.91417  | H 6.90831  | 2.17783  | 10.30003 |
| H 7.28757          | 5.24466  | 7.55838  | C 10.06545                      | 7.61284  | 5.86808  | C 9.81131  | 1.81475  | 3.45076  | H 6.66013  | 0.64096  | 8.33581  |
| H 7.64760          | 4.21156  | 9.81411  | H 8.28976                       | 8.70136  | 5.28427  | C 8.88390  | 2.83672  | 3.67393  | H 6.18858  | 0.45231  | 5.77744  |
| H 7.28081          | 1.74788  | 10.08993 | H 7.00789                       | 8.28487  | 7.40870  | C 4.33039  | 6.04407  | 5.18210  | H 8.56799  | -0.25901 | 5.00673  |
| H 6.57903          | 0.38793  | 8.10716  | H 8.33586                       | 7.81609  | 9.39970  | C 3.07158  | 6.57932  | 5.44520  | H 10.64548 | 0.40487  | 3.77207  |
| H 5.81588          | 0.41340  | 5.63827  | H 10.82408                      | 7.98303  | 9.01551  | C 2.00462  | 5.70946  | 5.69813  | H 10.87626 | 2.76211  | 2.95403  |
| H 8.00604          | -0.68980 | 4.80759  | H 10.36574                      | 6.32182  | 8.79734  | C 2.22632  | 4.32892  | 5.69070  | H 9.01955  | 4.38891  | 3.39289  |
| H 10.11324         | -0.40421 | 3.48393  | H 11.87412                      | 7.16727  | 6.86899  | C 3.51066  | 3.84699  | 5.43455  | H 4.84954  | 6.75786  | 5.05614  |
| H 10.71106         | 1.86670  | 2.61025  | H 10.53382                      | 7.63432  | 4.88688  | C 3.85631  | 2.37914  | 5.48098  | H 2.47724  | 7.47653  | 5.40699  |
| H 9.16147          | 3.78918  | 3.08318  |                                 |          |          | C 4.95972  | 1.65124  | 3.34804  | H 0.72392  | 5.70240  | 5.77538  |
| H 5.15567          | 6.89978  | 5.10739  | 65                              |          |          | C 5.09883  | 2.80337  | 2.38275  | H 1.41891  | 3.30142  | 5.79131  |
| H 2.89376          | 7.81312  | 5.71886  | FeO+CHD Intermediate (2/5)      |          |          | C 4.63290  | 2.74880  | 1.06827  | H 4.32653  | 1.93344  | 0.76838  |
| H 1.04330          | 6.19082  | 6.21403  | Fe 6.50284                      | 4.19892  | 4.86463  | C 4.87755  | 3.82704  | 0.21221  | H 4.51622  | 3.92234  | -0.73445 |
| H 1.51201          | 3.74069  | 6.11163  | N 5.22400                       | 2.32366  | 4.81271  | C 5.58387  | 4.93648  | 0.69027  | H 5.54419  | 6.03241  | 0.16430  |
| H 3.63821          | 2.02451  | 0.90021  | N 6.73861                       | 3.33371  | 6.85046  | C 6.01407  | 4.94749  | 2.01502  | H 6.31710  | 6.06952  | 2.55448  |
| H 3.83602          | 3.92452  | -0.70905 | N 7.90007                       | 2.61860  | 4.32894  | H 6.94630  | 5.25955  | 7.43328  | H 3.30355  | 1.64225  | 5.09662  |
| H 5.22241          | 5.92028  | -0.08138 | N 4.57791                       | 4.94513  | 5.44858  | H 7.19329  | 4.40001  | 9.78188  | H 4.13588  | 2.06022  | 6.55814  |
| H 6.33758          | 5.94456  | 2.17179  | N 5.78622                       | 4.21097  | 2.85430  | H 6.89465  | 1.94949  | 10.21087 | H 4.32206  | 1.16581  | 3.27059  |
| H 3.15268          | 1.94575  | 5.19303  | O 7.50762                       | 5.67568  | 4.92037  | H 6.37329  | 0.42762  | 8.29002  | H 6.07317  | 1.12713  | 3.15395  |
| H 4.15032          | 2.25272  | 6.60461  | C 7.07872                       | 3.99440  | 7.97916  | H 5.79860  | 0.25976  | 5.73740  | H 8.16362  | 6.01907  | 5.38169  |
| H 3.95556          | 1.29667  | 3.36238  | C 7.18648                       | 3.32507  | 9.20039  | H 8.10177  | -0.71726 | 4.96953  | C 9.22833  | 6.55250  | 5.74461  |
| H 5.67657          | 1.11871  | 3.06248  | C 6.93274                       | 1.95030  | 9.24540  | H 10.24488 | -0.27944 | 3.74511  | C 8.82050  | 7.82564  | 6.38253  |
| H 8.06201          | 7.67063  | 5.55827  | C 6.57969                       | 1.27219  | 8.06983  | H 10.72848 | 2.03664  | 2.92081  | C 8.97837  | 8.06177  | 7.70319  |
| C 8.61143          | 8.25911  | 6.31201  | C 6.49268                       | 1.99767  | 6.88467  | H 9.04733  | 3.85266  | 3.33533  | C 9.63012  | 7.07620  | 8.63728  |
| C 7.96349          | 8.08240  | 7.66525  | C 6.18824                       | 1.39520  | 5.51886  | H 5.18504  | 6.67130  | 4.97235  | C 10.15212 | 5.84774  | 7.94029  |
| C 8.61302          | 7.62042  | 8.74553  | C 7.48893                       | 1.38544  | 4.72567  | H 2.94424  | 7.65504  | 5.44343  | C 9.97980  | 5.62547  | 6.61868  |
| C 10.07182         | 7.22637  | 8.73748  | C 8.24737                       | 0.24698  | 4.46577  | H 1.01306  | 6.09890  | 5.89635  | H 9.66227  | 6.67351  | 4.73309  |
| C 10.71834         | 7.39862  | 7.38271  | C 9.46138                       | 0.39312  | 3.77939  | H 1.41930  | 3.63246  | 5.88279  | H 8.35653  | 8.57596  | 5.74715  |
| C 10.06887         | 7.86131  | 6.30427  | C 9.87768                       | 1.66619  | 3.37594  | H 4.09459  | 1.87416  | 0.72435  | H 8.65052  | 9.00517  | 8.13311  |
| H 8.50584          | 9.30632  | 5.98071  | C 9.06841                       | 2.76679  | 3.66628  | H 4.52388  | 3.79940  | -0.81146 | H 10.44961 | 7.56860  | 9.18907  |
| H 6.91315          | 8.35854  | 7.74178  | C 4.31800                       | 6.27386  | 5.54500  | H 5.80181  | 5.78406  | 0.05378  | H 8.91925  | 6.78531  | 9.43204  |
| H 8.08788          | 7.52358  | 9.69418  | C 3.03623                       | 6.74662  | 5.81167  | H 6.57146  | 5.77365  | 2.43431  | H 10.70912 | 5.13694  | 8.54602  |
| H 10.62110         | 7.81480  | 9.49222  | C 1.99667                       | 4.82133  | 5.97122  | H 3.06117  | 1.77306  | 5.04003  | H 10.40127 | 4.73339  | 6.16176  |
| H 10.17999         | 6.18194  | 9.07547  | C 2.27145                       | 4.45480  | 8.86793  | H 3.95285  | 2.06134  | 6.52364  | Cl 4.36960 | 10.12192 | 4.45821  |
| H 11.77042         | 7.12943  | 7.30892  | C 3.58159                       | 4.03892  | 5.61206  | H 3.98577  | 1.16617  | 3.24728  | O 5.22170  | 9.16090  | 5.27807  |
| H 10.59639         | 7.96712  | 5.35790  | C 3.95761                       | 2.57413  | 5.57633  | H 5.71469  | 0.89414  | 3.11491  | O 4.59149  | 9.85226  | 2.97155  |
|                    |          |          | C 4.96971                       | 1.95713  | 3.38008  | H 8.44499  | 7.58906  | 5.08909  | O 2.89787  | 9.91149  | 4.79482  |
| 65                 |          |          | C 5.04036                       | 3.15085  | 2.45302  | C 8.95366  | 8.13560  | 5.89871  | O 4.76397  | 11.55435 | 4.77647  |
| FeO + CHD TS (2/5) |          |          | C 4.42211                       | 3.14698  | 1.19926  | C 8.07663  | 8.15214  | 7.12854  | Cl 9.30628 | 7.25427  | 1.29416  |
| Fe 6.36017         | 4.18402  | 4.87789  | C 4.59384                       | 4.24407  | 3.43992  | C 8.47338  | 7.70061  | 8.32888  | O 10.34630 | 8.35091  | 1.13405  |
| N 5.20713          | 2.33427  | 4.79944  | C 5.37763                       | 5.32604  | 0.77129  | C 9.84623  | 7.12544  | 8.59337  | O 9.00051  | 6.63631  | -0.06169 |
| N 6.65995          | 3.37869  | 6.85107  | C 5.95730                       | 5.28023  | 2.03612  | C 10.70822 | 7.07221  | 7.35304  | O 9.85265  | 6.17558  | 2.23081  |
| N 7.86177          | 2.71970  | 4.34720  | H 7.26232                       | 5.05751  | 7.88517  | C 10.31092 | 7.52395  | 6.15415  | O 8.03030  | 7.84213  | 1.88604  |
| N 4.44697          | 4.90682  | 5.44399  | H 7.46195                       | 3.87317  | 10.09214 | H 9.07189  | 9.16236  | 5.51124  |            |          |          |
| N 5.72420          | 4.24453  | 8.70750  | H 7.00607                       | 1.40979  | 10.18150 | H 7.07602  | 8.56037  | 7.00040  |            |          |          |
| O 7.23549          | 5.62671  | 4.95025  | H 6.37564                       | 0.20865  | 8.07689  | H 7.79402  | 7.74808  | 9.17848  |            |          |          |
| C 6.97860          | 4.05216  | 7.97702  | H 5.78515                       | 0.38325  | 5.61855  | H 10.35360 | 7.71396  | 9.37738  |            |          |          |
| C 7.10970          | 3.38650  | 9.19844  | H 7.90006                       | -0.72685 | 4.78819  | H 9.75287  | 6.11628  | 9.02887  |            |          |          |
| C 6.90348          | 2.00402  | 9.24448  | H 10.06985                      | -0.47671 | 3.56287  | H 11.70176 | 6.64288  | 7.46994  |            |          |          |
| C 6.57630          | 1.31166  | 8.06921  | H 10.81023                      | 1.80884  | 2.84539  | H 10.98285 | 7.45840  | 5.30004  |            |          |          |
| C 6.46383          | 2.03291  | 6.88435  | H 9.33872                       | 3.77429  | 3.37864  | Cl 4.46897 | 10.32576 | 4.66448  |            |          |          |
| C 6.19381          | 1.42495  | 5.51428  | H 5.16010                       | 6.93638  | 5.39766  | O 5.38901  | 9.11635  | 4.81476  |            |          |          |
| C 7.50042          | 1.46657  | 4.73336  | H 2.85710                       | 7.81157  | 5.88496  | O 4.21920  | 10.59296 | 3.18774  |            |          |          |
| C 8.30848          | 0.36328  | 4.47417  | H 0.98647                       | 6.15944  | 6.16973  | O 3.14113  | 10.03981 | 5.36102  |            |          |          |
| C 9.52177          | 0.56720  | 3.80069  | H 1.48467                       | 3.71937  | 5.98538  | O 5.12256  | 11.54124 | 5.30256  |            |          |          |
| C 9.88679          | 1.85956  | 3.40951  | H 3.82050                       | 2.29843  | 0.89639  | Cl 9.67019 | 6.70248  | 1.39666  |            |          |          |
| C 9.02813          | 2.92319  | 3.69757  | H 4.12109                       | 4.25584  | -0.62506 | O 10.73395 | 7.82274  | 1.29869  |            |          |          |
| C 4.14429          | 6.22499  | 5.54345  | H 5.53071                       | 6.18985  | 0.13725  | O 9.52185  | 6.00508  | 0.05275  |            |          |          |
| C 2.84302          | 6.65242  | 5.79366  | H 6.56225                       | 6.08671  | 2.42884  | O 10.08363 | 5.68224  | 2.45507  |            |          |          |
| C 1.83244          | 5.69244  | 5.93264  | H 3.13800                       | 1.98293  | 5.15580  | O 8.33822  | 7.33397  | 1.79220  |            |          |          |
| C 2.15249          | 4.33536  | 5.82740  | H 4.09303                       | 2.22765  | 6.60602  |            |          |          |            |          |          |
| C 3.47872          | 3.96551  | 5.58885  | H 4.00068                       | 1.45770  | 3.28301  |            |          |          |            |          |          |
| C 3.91546          | 2.51960  | 5.55228  | H 5.72578                       | 1.23155  | 3.06338  |            |          |          |            |          |          |
| C 4.98082          | 1.95956  | 3.35733  | H 7.92774                       | 6.49667  | 5.25003  |            |          |          |            |          |          |
| C 5.03269          | 3.15804  | 4.34375  | C 8.55596                       | 8.41224  | 6.07096  |            |          |          |            |          |          |
| C 4.45611          | 3.14135  | 1.16485  | H 7.91149                       | 8.22312  | 7.33082  |            |          |          |            |          |          |
| C 4.61273          | 4.25261  | 0.33072  | C 8.57557                       | 7.66946  | 8.39644  |            |          |          |            |          |          |
| C 5.33877          | 5.36073  | 7.80595  | C 10.01640                      | 7.23971  | 8.30481  |            |          |          |            |          |          |
| C 5.87926          | 5.32718  | 2.06841  | C 10.63298                      | 7.48149  | 6.95241  |            |          |          |            |          |          |
| H 7.13130          | 5.12027  | 7.88083  | C 9.92462                       | 8.03899  | 5.91738  |            |          |          |            |          |          |
| H 7.36734          | 3.94397  | 10.08969 | H 8.02954                       | 8.90207  | 5.25814  |            |          |          |            |          |          |
| H 6.99538          | 1.46723  | 10.18104 | H 6.87578                       | 8.53175  | 7.44246  |            |          |          |            |          |          |
| H 6.41242          | 0.24128  | 8.07724  | H 8.07361                       | 7.54241  | 9.35160  |            |          |          |            |          |          |
| H 5.81513          | 0.40295  | 5.59987  | H 10.61203                      | 7.74956  | 9.08687  |            |          |          |            |          |          |
| H 8.00076          | -0.62684 | 4.78695  | H 10.11160                      | 6.17087  | 8.57799  |            |          |          |            |          |          |
| H 10.16947         | -0.27394 | 3.58478  | H 11.67497                      | 7.20512  | 6.81936  |            |          |          |            |          |          |
| H 10.81769         | 2.04523  | 2.88952  | H 10.41089                      | 8.20722  | 4.96049  |            |          |          |            |          |          |
| H 9.25685          | 3.94282  | 3.41695  |                                 |          |          |            |          |          |            |          |          |
| H 4.96800          | 6.91378  | 5.41273  | 75                              |          |          |            |          |          |            |          |          |
| H 2.62705          | 7.71026  | 5.87028  | FeO+CHD+counterions React (0/3) |          |          |            |          |          |            |          |          |
| H 0.80887          | 5.99630  | 6.11738  | Fe 6.26457                      | 3.85591  | 4.74299  |            |          |          |            |          |          |
| H 1.38841          | 3.57430  | 5.93034  | N 5.16152                       | 2.11928  | 4.76875  |            |          |          |            |          |          |
| H 3.89818          | 2.27313  | 0.83564  | N 6.53674                       | 3.37768  | 6.65357  |            |          |          |            |          |          |
| H 4.17222          | 4.25471  | -0.65923 | N 7.73617                       | 2.58082  | 4.33699  |            |          |          |            |          |          |
| H 5.47796          | 6.23543  | 0.16384  | N 4.53653                       | 4.70398  | 5.17847  |            |          |          |            |          |          |
| H 6.43905          | 6.15237  | 2.48768  | N 5.76640                       | 3.89863  | 2.83746  |            |          |          |            |          |          |
| H 3.13329          | 1.89158  | 5.11616  | O 7.16399                       | 5.24433  | 4.74634  |            |          |          |            |          |          |
| H 4.05848          | 2.12738  | 6.58041  | C 6.82182                       | 4.21197  | 8.76750  |            |          |          |            |          |          |
| H 4.02670          | 1.43541  | 3.25141  | C 6.96040                       | 3.71811  | 8.97455  |            |          |          |            |          |          |
| H 5.76023          | 1.25400  | 3.05334  | C 6.79651                       | 2.34929  | 9.20898  |            |          |          |            |          |          |
| H 8.05771          | 6.97295  | 5.42431  | C 6.50419                       | 1.49143  | 8.13805  |            |          |          |            |          |          |
| C 8.59415          | 7.86021  | 5.92575  | C 6.38407                       | 2.04046  | 6.86689  |            |          |          |            |          |          |
| C 8.04831          | 7.98370  | 7.31054  | C 6.15186                       | 1.27904  | 5.57109  |            |          |          |            |          |          |
| C 8.78124          | 7.72137  | 8.41209  | C 7.45957                       | 1.32795  | 4.79708  |            |          |          |            |          |          |

|                                 |          |          |                              |          |          |             |          |          |                   |         |          |
|---------------------------------|----------|----------|------------------------------|----------|----------|-------------|----------|----------|-------------------|---------|----------|
| H 4.01214                       | 2.04072  | 6.49567  | Cl 5.56380                   | 9.24221  | 2.16756  | N 4.10483   | 4.80698  | 5.39940  | C 10.06811        | 2.05559 | 3.59231  |
| H 4.23737                       | 1.11319  | 3.22078  | O 5.86030                    | 8.54695  | 3.49276  | N 5.35389   | 4.15806  | 2.79511  | C 9.99550         | 3.40767 | 3.24407  |
| H 5.99024                       | 1.07378  | 3.11719  | O 6.12174                    | 8.40726  | 1.01805  | O 6.82970   | 5.98334  | 4.77570  | C 8.87366         | 4.15112 | 3.61734  |
| H 7.79292                       | 5.75964  | 5.22287  | O 4.05796                    | 9.39198  | 2.00099  | O 6.82175   | 4.36959  | 7.88332  | C 3.78000         | 6.03580 | 5.60762  |
| C 9.46617                       | 7.38880  | 5.78094  | O 6.21788                    | 10.61470 | 2.15935  | C 7.05688   | 3.77788  | 9.12680  | C 2.44646         | 6.22189 | 5.96210  |
| C 8.55695                       | 7.98595  | 6.70338  | Cl 10.17726                  | 6.57678  | 2.03544  | C 6.99987   | 2.38466  | 9.23719  | C 1.64239         | 5.09983 | 6.19318  |
| C 8.71931                       | 7.84504  | 8.05955  | O 9.69862                    | 7.86606  | 2.69174  | C 6.71738   | 1.61130  | 8.10212  | C 2.19505         | 3.82117 | 6.07105  |
| C 9.86482                       | 7.06539  | 8.65290  | O 11.19905                   | 6.90369  | 0.95498  | C 6.49745   | 2.26301  | 6.89135  | C 3.54104         | 3.69222 | 5.72682  |
| C 10.77764                      | 6.45900  | 7.61807  | O 10.82374                   | 5.67694  | 3.08525  | C 6.25679   | 1.56085  | 5.56097  | C 4.24247         | 2.35809 | 5.64541  |
| C 10.56755                      | 6.62990  | 6.27240  | O 8.99119                    | 5.84824  | 1.41092  | C 7.52247   | 1.71776  | 4.72735  | C 5.31901         | 2.08867 | 3.38877  |
| H 9.33337                       | 7.52373  | 4.71319  |                              |          |          | C 8.44037   | 0.69961  | 4.48558  | C 5.05652         | 3.31137 | 2.54407  |
| H 7.71711                       | 8.55892  | 6.31858  | 75                           |          |          | C 9.60049   | 1.00207  | 3.75690  | C 4.47068         | 3.24781 | 1.27936  |
| H 8.01954                       | 8.31000  | 8.74890  | FeO+CHD+counterions TS (0/5) |          |          | C 9.80344   | 2.30515  | 3.29322  | C 4.33278         | 4.42215 | 0.53279  |
| H 10.44762                      | 7.71279  | 9.33800  | Fe 6.30016                   | 4.09569  | 5.03662  | C 8.83881   | 3.28017  | 3.56126  | C 4.77995         | 5.63504 | 1.06929  |
| H 9.47829                       | 6.27559  | 9.32631  | N 5.16078                    | 2.25028  | 4.84297  | C 3.63782   | 6.08099  | 5.44811  | C 5.34373         | 5.63477 | 2.34242  |
| H 11.62431                      | 5.87871  | 7.97477  | N 6.61351                    | 3.15505  | 6.95158  | C 2.30241   | 6.35518  | 5.73156  | H 6.69128         | 5.71642 | 7.70866  |
| H 11.25289                      | 6.18179  | 5.55784  | N 7.80284                    | 2.69393  | 4.03546  | C 1.42713   | 5.28572  | 5.95924  | H 7.31133         | 4.45166 | 9.93818  |
| Cl 4.47544                      | 10.13963 | 4.68893  | N 4.40044                    | 4.76190  | 5.69977  | C 1.91434   | 3.97692  | 5.90398  | H 7.64422         | 2.27608 | 10.13296 |
| O 5.15289                       | 9.13950  | 5.62409  | N 5.60443                    | 4.31343  | 3.05868  | C 3.26825   | 3.76361  | 5.62710  | H 7.35937         | 0.84099 | 8.09852  |
| O 4.93961                       | 9.89233  | 3.26081  | O 7.17668                    | 5.52262  | 5.22382  | C 3.87112   | 2.37628  | 5.63902  | H 6.64534         | 0.74972 | 5.58255  |
| O 2.96315                       | 9.96113  | 4.77235  | C 6.92656                    | 3.75291  | 8.12072  | C 4.91554   | 1.82901  | 3.43980  | H 9.04444         | 0.42281 | 4.59354  |
| O 4.84176                       | 11.55462 | 5.10858  | C 7.07348                    | 3.00578  | 9.29192  | C 4.77962   | 2.97469  | 2.46058  | H 10.92722        | 1.46143 | 3.30583  |
| Cl 9.59796                      | 6.93456  | 1.41954  | C 6.88843                    | 1.62011  | 9.24065  | C 4.14333   | 2.81098  | 1.22661  | H 10.79168        | 3.88601 | 2.68898  |
| O 10.71862                      | 7.84601  | 0.94350  | C 6.56487                    | 1.00714  | 8.02120  | C 4.11716   | 3.87918  | 0.32532  | H 8.76884         | 5.19718 | 0.53720  |
| O 9.10439                       | 6.08130  | 2.60004  | C 6.43596                    | 1.80855  | 6.89031  | C 4.72128   | 5.09192  | 0.67889  | H 4.44919         | 6.86093 | 5.40521  |
| O 10.12599                      | 6.02381  | 2.52883  | C 6.16144                    | 1.29884  | 5.48156  | C 5.32813   | 5.20289  | 1.92782  | H 2.04958         | 7.22506 | 6.06457  |
| O 8.44773                       | 7.77696  | 1.95802  | C 7.46035                    | 1.41155  | 4.69496  | H 6.86142   | 5.44121  | 7.73767  | H 0.59935         | 5.21732 | 6.46102  |
|                                 |          |          | C 8.27835                    | 0.34044  | 3.49808  | C 5.27867   | 4.39918  | 9.98489  | H 1.59497         | 2.93595 | 6.24145  |
|                                 |          |          | C 9.48353                    | 0.60814  | 3.68219  | H 7.17340   | 1.90279  | 10.19195 | H 4.13222         | 2.29589 | 0.88932  |
| 75                              |          |          | C 9.82879                    | 1.92955  | 3.88399  | H 6.66908   | 0.53090  | 8.15885  | H 3.88056         | 4.39058 | -0.45108 |
| FeO+CHD+counterions React (0/5) |          |          | C 8.96069                    | 2.96121  | 3.75267  | H 6.02217   | 0.50333  | 5.71537  | H 4.68778         | 6.56162 | 0.51793  |
| Fe 6.33037                      | 4.10438  | 4.77539  | C 4.09797                    | 6.06606  | 5.91589  | H 8.25607   | -0.30192 | 4.85447  | H 5.69619         | 6.54974 | 2.81641  |
| N 5.22401                       | 2.34531  | 4.84062  | C 2.80300                    | 6.46536  | 6.23557  | H 10.33104  | 0.22734  | 3.55638  | H 3.59410         | 1.59506 | 5.20891  |
| N 6.71896                       | 3.45629  | 6.77865  | C 1.79896                    | 5.49240  | 6.32248  | H 10.68869  | 2.57725  | 2.73358  | H 4.49658         | 2.01852 | 6.65389  |
| N 7.82554                       | 2.68344  | 4.27120  | C 2.11881                    | 4.15036  | 6.09549  | H 8.94679   | 4.29845  | 3.21258  | H 4.50578         | 1.36438 | 3.30380  |
| N 4.51506                       | 4.93356  | 5.36685  | C 3.43885                    | 3.80749  | 5.79021  | H 4.35643   | 6.86525  | 5.24949  | H 6.22600         | 1.59088 | 3.03332  |
| N 5.61000                       | 4.14068  | 2.81481  | C 3.87417                    | 2.37040  | 5.61735  | H 1.95748   | 7.38071  | 5.76533  | O 7.86107         | 6.50198 | 5.47777  |
| O 7.21872                       | 5.49233  | 4.74198  | C 4.92589                    | 1.98036  | 3.37929  | H 0.38050   | 5.46840  | 6.17265  |                   |         |          |
| O 5.21872                       | 5.49233  | 4.74198  | C 4.91835                    | 3.25025  | 2.55998  | H 1.25857   | 3.13127  | 6.07367  |                   |         |          |
| C 7.07410                       | 4.19393  | 7.85224  | C 4.29554                    | 3.32375  | 1.31232  | H 3.68024   | 1.86303  | 0.97988  |                   |         |          |
| C 7.26126                       | 3.59434  | 9.10077  | C 4.39839                    | 4.50408  | 0.56814  | H 6.32919   | 3.76808  | -0.63592 | 52                |         |          |
| C 7.07283                       | 2.21475  | 9.22997  | C 5.11664                    | 5.58705  | 1.08806  | H 4.71666   | 5.93940  | 0.00543  | FeO Triplet (2/3) |         |          |
| C 6.70625                       | 1.45588  | 8.10826  | C 5.70597                    | 5.46262  | 2.34498  | H 5.79368   | 6.12226  | 2.25942  | Fe 6.13884        | 4.37302 | 4.90493  |
| C 6.53917                       | 2.11214  | 6.89360  | H 7.05717                    | 4.82721  | 8.09661  | H 7.14499   | 1.64461  | 5.27033  | N 5.50661         | 2.45959 | 4.83288  |
| C 6.22319                       | 1.44217  | 5.56522  | H 7.32639                    | 3.50271  | 10.21959 | H 4.08675   | 2.10336  | 6.67716  | N 6.65711         | 3.86788 | 6.75052  |
| C 7.49980                       | 1.44654  | 4.73827  | H 6.99301                    | 1.02037  | 10.13682 | H 5.49554   | 2.18306  | 3.39086  | N 7.84116         | 3.57168 | 4.28190  |
| C 8.31900                       | 3.04562  | 4.51504  | H 6.41514                    | -0.06334 | 7.95520  | H 5.76732   | 1.21338  | 3.13327  | N 4.31530         | 4.79176 | 5.51974  |
| C 9.50704                       | 0.53572  | 3.79249  | H 5.79256                    | 0.26957  | 5.49473  | H 6.80331   | 6.96853  | 4.76103  | N 5.49554         | 4.49490 | 3.04737  |
| C 9.83420                       | 1.81071  | 3.32144  | H 7.98492                    | -0.67381 | 4.58999  | C 9.43120   | 7.98918  | 6.23128  | O 6.60398         | 6.22702 | 4.90409  |
| C 8.96653                       | 2.87728  | 3.57472  | H 10.13860                   | -0.20751 | 3.40023  | C 8.64066   | 8.11384  | 7.40938  | C 6.79044         | 4.66000 | 7.83547  |
| C 4.24698                       | 6.26250  | 5.38833  | H 10.75218                   | 2.16810  | 2.87214  | C 9.04471   | 7.57471  | 8.60571  | C 7.14868         | 4.11747 | 9.07142  |
| C 2.97094                       | 6.73135  | 6.99171  | H 9.17948                    | 3.99709  | 3.53374  | C 10.34506  | 6.82413  | 8.74531  | C 3.76329         | 2.73996 | 9.17690  |
| C 1.95518                       | 5.80597  | 5.96339  | H 4.91623                    | 6.76693  | 5.81957  | C 11.12446  | 6.73225  | 7.45792  | C 7.22090         | 1.92407 | 8.04341  |
| C 2.24042                       | 4.43684  | 5.92713  | H 2.58680                    | 7.51237  | 6.40472  | C 10.67083  | 7.29118  | 6.28872  | C 6.86811         | 2.52301 | 6.84153  |
| C 3.53999                       | 4.02309  | 5.62905  | H 0.78030                    | 5.77537  | 5.56022  | H 9.08978   | 8.42578  | 5.30022  | C 6.72921         | 1.83017 | 5.49398  |
| C 3.95287                       | 2.57217  | 5.63600  | H 1.35996                    | 3.37948  | 6.15527  | H 7.69783   | 8.65108  | 7.35013  | C 9.01993         | 2.26031 | 4.65015  |
| C 4.93351                       | 1.87966  | 4.42751  | H 3.74386                    | 2.47201  | 9.32292  | H 8.43190   | 7.68637  | 9.49645  | C 7.91570         | 1.47692 | 4.31374  |
| C 4.89621                       | 3.03754  | 2.46205  | H 3.92149                    | 4.57623  | -0.40241 | H 10.96878  | 7.29077  | 9.53362  | C 10.05711        | 2.06916 | 3.58197  |
| C 4.22609                       | 2.98128  | 1.23948  | H 5.22374                    | 6.51761  | 0.54595  | H 10.15512  | 5.80894  | 9.14671  | C 9.96756         | 3.30294 | 3.21528  |
| C 4.30591                       | 4.07617  | 0.37106  | H 6.26083                    | 6.27189  | 2.79957  | H 12.07363  | 6.20347  | 7.48412  | C 8.83660         | 4.14900 | 3.57533  |
| C 5.04752                       | 5.20272  | 7.04550  | H 3.08767                    | 1.78710  | 5.12991  | H 11.26205  | 7.20185  | 5.38119  | C 3.79568         | 6.03728 | 5.64692  |
| C 5.68883                       | 5.20792  | 1.98279  | H 4.02165                    | 1.92945  | 6.60822  | Cl 6.43142  | 9.45952  | 3.38299  | C 2.47178         | 6.22612 | 6.03085  |
| H 7.21033                       | 5.25697  | 7.69909  | H 3.99113                    | 1.42851  | 3.24407  | O 6.32019   | 8.67993  | 4.71184  | C 1.66890         | 5.10476 | 6.27377  |
| H 7.54792                       | 4.20186  | 9.94912  | H 5.72812                    | 1.33273  | 3.01223  | O 6.12309   | 8.51504  | 2.23094  | C 2.21212         | 3.82417 | 6.13196  |
| H 7.20824                       | 1.73068  | 10.18944 | H 8.06750                    | 6.85772  | 5.66587  | O 5.42932   | 10.59516 | 3.40913  | C 3.54972         | 3.69017 | 5.75816  |
| H 6.55510                       | 0.38616  | 8.17979  | C 8.66133                    | 7.76810  | 6.04488  | O 8.39358   | 10.00671 | 3.24453  | C 4.23308         | 2.34734 | 5.64110  |
| H 5.82454                       | 0.43385  | 5.69827  | C 8.04439                    | 8.20875  | 7.33217  | Cl 10.68859 | 6.45574  | 1.87303  | C 5.31550         | 2.07727 | 3.38235  |
| H 8.04106                       | -0.63047 | 4.89126  | C 6.68876                    | 8.14773  | 8.51444  | O 10.92874  | 7.79348  | 2.56020  | C 5.08646         | 3.30294 | 2.52926  |
| H 10.16399                      | -0.30384 | 3.60148  | C 10.11060                   | 7.66910  | 8.65045  | O 11.31766  | 6.47107  | 0.48710  | C 4.52674         | 3.23899 | 1.25283  |
| H 10.74591                      | 1.98420  | 2.76383  | C 10.75532                   | 7.32894  | 7.33214  | O 11.31558  | 5.33841  | 2.70104  | C 4.40429         | 4.41287 | 0.50294  |
| H 9.17294                       | 3.88206  | 3.23238  | C 10.10237                   | 7.39012  | 6.15461  | O 9.18649   | 6.20955  | 1.74413  | C 4.83851         | 5.62802 | 1.04691  |
| H 5.06447                       | 6.92487  | 5.13673  | H 8.48296                    | 8.48852  | 5.23207  |             |          |          | C 5.37599         | 5.63913 | 2.33042  |
| H 2.77953                       | 7.79689  | 5.70348  | H 7.02298                    | 8.58087  | 7.28991  |             |          |          | H 6.61448         | 5.71667 | 7.69544  |
| H 0.95215                       | 6.14466  | 6.19335  | H 8.19121                    | 8.47343  | 9.42521  |             |          |          | H 7.25441         | 4.76736 | 9.92992  |
| H 1.46906                       | 3.70274  | 6.12565  | H 10.71179                   | 8.43217  | 9.17491  |             |          |          | H 7.63666         | 2.30000 | 10.12815 |
| C 3.65356                       | 2.10078  | 0.97481  | H 10.15002                   | 6.79512  | 9.32520  |             |          |          | H 7.37807         | 0.85460 | 8.09853  |
| H 3.78972                       | 4.05054  | -0.58124 | H 11.80366                   | 7.03986  | 7.36019  |             |          |          | H 6.64475         | 0.74560 | 5.58256  |
| H 5.12345                       | 6.07323  | 0.10776  | H 10.61617                   | 7.14168  | 5.22948  |             |          |          | H 9.05804         | 0.43653 | 4.60937  |
| H 6.25939                       | 6.05744  | 2.32920  | Cl 6.39931                   | 9.54217  | 1.94513  |             |          |          | H 10.92421        | 1.48226 | 3.30463  |
| C 3.15511                       | 1.93705  | 5.24287  | O 6.58580                    | 8.74388  | 3.23390  |             |          |          | H 10.75782        | 3.89403 | 2.65015  |
| H 4.12985                       | 2.25545  | 6.66841  | O 6.53874                    | 8.60965  | 0.74552  |             |          |          | H 8.71484         | 5.91922 | 3.31845  |
| H 3.99688                       | 1.31671  | 3.40804  | O 5.01418                    | 10.17312 | 1.93708  |             |          |          | H 4.46739         | 6.85760 | 5.43357  |
| H 5.72599                       | 1.89899  | 3.12392  | O 7.45699                    | 10.63132 | 1.86670  |             |          |          | H 2.08000         | 7.22986 | 6.13040  |
| H 8.11464                       | 7.66128  | 5.86630  | Cl 10.37506                  | 6.34895  | 1.95307  |             |          |          |                   |         |          |

|                            |                            |                            |                            |
|----------------------------|----------------------------|----------------------------|----------------------------|
| Fe 6.18317 4.53519 4.95890 | H 1.77983 7.15491 6.12204  | C 5.10524 3.32557 2.54080  | C 7.25425 1.82247 8.01970  |
| N 5.53005 2.57113 4.87071  | H 0.44674 5.04200 6.38489  | C 4.52254 3.22341 1.27457  | C 6.92507 2.54458 6.87515  |
| N 6.79019 3.96815 6.79298  | H 1.59806 2.84133 6.12356  | C 4.37985 4.36741 0.48704  | C 6.74344 1.92025 5.49539  |
| N 8.00854 3.49785 4.26794  | H 4.10785 2.24071 0.94766  | C 4.82218 5.59792 0.98562  | C 7.97177 2.27984 4.66627  |
| N 4.13293 4.81295 5.61339  | H 3.82418 4.23768 -0.52455 | C 5.38401 5.64736 2.25728  | C 8.99129 1.38461 4.35254  |
| N 5.53692 4.65758 3.06686  | H 4.65045 6.47069 0.27589  | H 6.69498 5.72410 7.80252  | C 10.10224 1.85512 3.63876 |
| O 6.56459 6.40636 5.25267  | H 5.70488 6.61417 2.53991  | H 7.25220 4.69373 10.01543 | C 10.15896 3.20037 3.26039 |
| C 7.00089 4.74925 7.87415  | H 3.64947 1.64327 5.24450  | H 7.56780 2.20920 10.14789 | C 9.10039 4.00440 3.60222  |
| C 7.37405 4.18675 9.09600  | H 4.54834 2.13398 6.66883  | H 7.31501 0.83972 8.06495  | C 3.59647 6.11796 5.73739  |
| C 7.52359 2.79931 9.18876  | H 4.54278 1.43690 3.31925  | H 6.69191 0.78605 5.60577  | C 2.23442 6.20696 6.01077  |
| C 7.30218 1.99650 8.05909  | H 6.25801 1.68138 3.04742  | H 8.99943 0.41398 4.61394  | C 1.49422 5.02472 6.13349  |
| C 6.93549 2.61130 6.86787  | O 6.84682 6.41834 5.02645  | H 10.90327 1.36139 3.28909 | C 2.13929 3.79312 5.98823  |
| C 6.73717 1.90388 5.53295  |                            | H 10.83430 3.77679 2.61776 | C 3.51253 3.76588 5.72851  |
| C 7.95518 2.20214 4.67121  | 52                         | H 8.86535 5.16389 3.29830  | C 4.27492 2.45813 5.65350  |
| C 8.95716 1.29168 4.35317  | FeO Quintet QIII (2/5)     | H 4.40413 6.92018 5.51274  | C 5.33837 2.18749 3.40539  |
| C 10.04950 1.74558 3.59789 | Fe 6.25007 4.64595 4.89494 | H 2.01630 7.21281 6.16252  | C 5.04935 3.7995 2.51489   |
| C 10.10035 3.08178 3.18842 | N 5.54512 2.56032 4.83366  | H 0.60527 5.16411 6.53316  | C 4.40039 3.22454 1.28642  |
| C 9.05439 3.94086 5.53770  | N 6.81028 3.91256 6.84635  | H 1.65379 2.91342 6.25068  | C 4.22922 4.33642 0.45709  |
| C 3.49913 6.00371 7.53993  | N 8.01789 3.57565 4.27040  | H 4.18992 2.25641 0.91732  | C 4.70473 5.58548 0.36222  |
| C 2.13273 6.07012 6.00379  | N 4.24385 4.89766 5.57446  | H 3.92952 4.30115 -0.49600 | C 5.33010 5.68236 2.11499  |
| C 1.40935 4.87668 6.12406  | N 5.51014 4.57078 2.91298  | H 4.73027 6.50740 2.06644  | H 8.86799 5.64985 8.01707  |
| C 2.07110 3.65144 5.98903  | O 6.66598 7.48149 5.86538  | H 5.73762 6.57429 2.68526  | H 7.47788 4.47819 10.14627 |
| C 3.44509 3.65186 5.74076  | C 7.00971 4.62489 7.97725  | H 3.58129 1.64100 5.19147  | H 7.71477 1.98166 10.12271 |
| C 4.26361 2.38509 5.67756  | C 7.34672 3.99252 9.17578  | H 4.49707 2.01270 6.63816  | H 7.34677 0.74427 7.97823  |
| C 5.33442 2.22751 3.40936  | C 7.47177 2.59968 9.19641  | H 4.52229 1.38936 3.27656  | H 6.63319 0.83491 5.57507  |
| C 5.10640 3.46165 2.56718  | C 7.26361 1.86715 8.01863  | H 6.24634 1.59283 3.03593  | H 8.91953 0.34707 4.65442  |
| C 4.53007 3.39254 1.29815  | C 6.93512 2.55762 6.85589  | O 7.29222 6.43328 4.42878  | H 10.90797 1.17824 3.38121 |
| C 4.41212 4.55858 5.03517  | C 6.75282 1.91361 5.48711  | 52                         | H 11.00344 3.59221 2.70835 |
| C 4.86943 5.77460 1.05682  | C 7.97523 2.26990 4.65099  | FeO Quintet QSII (2/5)     | H 9.09202 5.09090 3.32647  |
| C 5.42455 7.92629 2.33242  | C 9.00535 1.38797 4.33848  | Fe 6.25472 4.70186 4.94172 | H 4.21117 7.00026 5.61717  |
| H 6.86413 5.81384 7.73765  | C 10.10656 1.87211 3.61772 | N 5.55199 2.59468 4.86008  | H 1.76670 7.17738 6.11571  |
| H 7.54096 4.82686 9.95217  | C 10.14381 3.21616 3.23244 | N 6.80491 3.91662 6.88394  | H 0.43019 5.06138 6.33490  |
| H 7.80726 2.34155 10.12855 | C 9.07551 4.04818 5.37277  | N 8.02270 3.60259 4.31593  | H 1.58834 2.86453 6.07563  |
| H 7.41034 0.92058 8.10778  | C 3.63927 6.10474 5.71587  | N 4.21678 4.91473 5.55086  | H 4.03788 2.24828 0.98777  |
| H 6.58113 0.83007 5.65823  | C 2.28081 6.20771 6.00167  | N 5.50404 4.59764 2.94524  | H 3.72886 4.23076 -0.49820 |
| H 8.89016 0.26158 4.68000  | C 1.52841 5.03428 6.13377  | O 6.72062 6.68759 5.68802  | H 4.58748 6.46722 0.25848  |
| H 10.84625 1.06086 3.33359 | C 2.15786 3.79431 5.98917  | C 6.99678 4.61650 8.02488  | H 5.70218 6.26595 2.49201  |
| H 10.93225 3.45682 2.60642 | C 3.52732 3.75100 5.71663  | C 2.33455 3.97188 9.21669  | H 6.63343 1.66860 5.25035  |
| H 9.03451 4.98314 3.24874  | C 4.28512 2.44464 6.64500  | C 7.47035 2.58018 9.22213  | H 4.53906 2.15598 6.67183  |
| H 4.10988 6.88929 5.62123  | C 5.34620 2.16620 3.39551  | C 7.26796 1.86035 8.03562  | H 4.53656 1.44804 3.31618  |
| H 1.64790 7.03267 6.10358  | C 5.06951 3.35384 2.49918  | C 6.93711 2.56265 6.88106  | H 6.25056 1.70208 3.04409  |
| H 0.34344 4.89926 6.31710  | C 4.44372 3.20651 1.25860  | C 6.75444 1.93368 5.50787  | O 7.40678 7.74092 5.16901  |
| H 1.53394 2.71505 6.07714  | C 4.28966 4.32480 0.43407  | C 7.97478 2.29119 4.67317  | 52                         |
| H 4.18293 2.44088 0.91521  | C 4.75869 5.57145 0.86749  | C 8.99309 1.40564 4.33458  | FeO Septet sideoen (2/7)   |
| H 3.96698 4.51829 -0.45162 | C 5.36087 5.66213 2.11866  | H 10.08980 1.89282 3.60877 | Fe 6.25379 4.69902 4.94169 |
| H 4.79244 6.69393 0.49150  | H 6.89921 5.69962 7.90592  | C 10.13287 3.24279 3.24681 | N 5.55412 2.59903 4.86096  |
| H 5.78542 6.70332 2.78849  | H 7.50491 4.58261 10.00905 | C 9.07636 4.07858 3.61534  | N 6.81078 3.92213 6.89059  |
| H 3.68395 1.55702 6.26198  | H 7.72664 2.08623 10.11559 | C 3.59462 6.11687 5.65905  | N 8.03150 3.60811 4.31550  |
| H 4.54618 2.09709 6.69466  | H 7.35417 0.78822 8.00755  | C 2.23507 6.20854 5.94142  | N 4.21445 4.92333 5.55280  |
| H 4.50069 1.52953 3.30336  | H 6.63574 0.83026 5.57510  | C 1.49931 5.02813 6.10512  | N 5.50347 4.60623 2.94057  |
| H 6.22746 1.70957 3.04831  | H 8.95026 0.35136 4.64632  | C 2.14555 3.79396 5.99005  | O 6.73252 6.68023 5.68884  |
| O 7.63399 6.76358 4.48834  | H 10.92106 1.20578 3.36070 | C 3.51557 3.76374 5.71794  | C 7.00100 4.61507 8.03645  |
| 52                         | H 10.98137 3.61678 2.67647 | C 4.29309 2.47022 5.67239  | C 7.33524 3.96476 9.22607  |
| FeO Quintet QII (2/5)      | H 9.05019 5.09370 3.29442  | C 5.35013 2.19695 3.42389  | C 7.46946 2.57295 9.22554  |
| Fe 6.23520 4.66040 4.92990 | H 4.26482 6.98046 5.99841  | C 5.06393 3.38154 2.53141  | C 7.26801 1.85956 8.03524  |
| N 5.54221 2.56186 4.84241  | H 1.82535 7.18348 6.10974  | C 4.43227 3.23298 1.29389  | C 6.94043 2.56771 6.88303  |
| N 6.78783 3.89504 6.87416  | H 0.46679 5.08382 6.34441  | C 4.26891 4.35139 0.47178  | C 6.75742 1.94046 5.50865  |
| N 8.01680 3.59623 4.30843  | H 1.59837 2.87223 6.08823  | C 4.73750 5.59826 0.90452  | C 7.97855 2.29685 4.67382  |
| N 4.21781 4.89110 5.57512  | H 4.08676 2.23266 9.04657  | C 5.34723 5.68855 2.15217  | C 8.99244 1.40595 4.33514  |
| N 5.49623 4.58116 2.93701  | H 3.80746 4.22580 -0.53111 | H 6.87831 5.68983 7.96499  | C 10.09076 1.88616 3.60753 |
| O 7.27043 7.66512 5.11119  | H 4.65409 6.45628 0.25325  | H 7.48580 4.55315 10.11693 | C 10.13920 3.23521 3.24306 |
| C 6.96927 4.59388 8.01725  | H 5.72918 6.60061 2.51193  | H 7.72800 2.05798 10.13557 | C 9.08707 4.07630 3.61183  |
| C 7.30347 3.94911 9.20990  | H 3.64826 1.65206 5.24198  | H 7.36431 0.78214 8.01157  | C 3.58514 6.12227 5.66033  |
| C 7.44488 2.55771 9.21308  | H 4.55240 2.14399 6.66293  | H 6.62732 0.85064 5.58375  | C 2.22499 6.20831 5.94131  |
| C 7.25217 1.83889 8.02439  | H 4.53831 1.43298 3.31634  | H 8.93182 0.36441 4.62514  | C 1.49397 5.02495 6.10435  |
| C 6.92491 2.54160 6.86865  | H 6.25413 1.66859 3.04557  | H 10.89538 1.22440 3.33003 | C 2.14604 3.79404 5.98937  |
| C 6.75115 1.91317 5.49229  | O 6.83008 6.44617 5.04566  | H 10.96649 3.64658 2.68717 | C 3.51673 3.76961 5.71878  |
| C 7.97381 2.28365 4.66284  | 52                         | H 9.05834 5.12911 3.35881  | C 4.29587 2.47614 5.67308  |
| C 9.00145 1.40605 4.33042  | FeO Quintet QSI (2/5)      | H 4.20920 6.99527 5.51227  | C 5.35278 2.20326 3.42502  |
| C 10.10080 1.90252 3.61502 | Fe 6.23800 4.55553 4.91997 | H 1.76584 7.18027 6.02384  | C 5.06526 3.38751 2.53105  |
| C 10.13838 3.25370 3.25606 | N 5.52349 2.45466 4.83406  | H 0.43743 5.06837 6.31633  | C 4.43212 3.23245 1.29479  |
| C 9.07277 4.08086 3.61741  | N 6.71711 3.90901 6.79099  | H 1.59942 2.86665 6.11175  | C 4.26468 4.34649 0.46793  |
| C 3.60056 6.09247 5.71491  | N 7.92295 3.59812 4.28876  | H 4.07822 2.25771 10.98302 | C 4.73033 5.59619 0.89545  |
| C 2.24466 6.18346 6.01461  | N 4.32438 4.83899 5.53546  | H 3.78092 4.25233 -0.49046 | C 5.34125 5.69293 2.14199  |
| C 1.50629 5.00251 6.16198  | N 5.52077 4.53017 3.01833  | H 4.62750 6.48406 0.29262  | H 6.88325 5.68869 7.98341  |
| C 2.14693 3.76879 6.01523  | O 6.70291 6.59291 5.64528  | H 5.71901 6.62740 2.54087  | H 7.48499 4.54185 10.12928 |
| C 3.51425 3.73888 5.72835  | C 6.84152 4.65928 7.90874  | H 3.67199 1.65919 5.28150  | H 7.72458 2.04604 10.13701 |
| C 4.28165 2.43767 5.65175  | C 7.15316 4.07105 9.13603  | H 4.56401 2.19306 6.69563  | H 7.36201 0.78122 8.00629  |
| C 5.34741 2.17328 3.40358  | C 7.33018 2.68636 9.20499  | H 4.54672 1.45836 3.34993  | H 6.63258 0.85709 5.58519  |
| C 5.06822 3.36358 2.51304  | C 7.19243 1.91512 8.04241  | H 6.25990 1.70532 3.06577  | H 8.92595 0.36533 4.62691  |
| C 4.45385 3.21638 1.26640  | C 6.88647 2.55827 6.84811  | O 7.31359 6.52017 4.46394  | H 10.89281 2.1340 3.32900  |
| C 4.29781 4.33618 0.44493  | C 6.74779 1.87247 5.49792  | 52                         | H 10.97364 3.63430 2.68120 |
| C 4.75510 5.58395 0.88740  | C 7.94646 2.28692 4.65870  | FeO Septet endon (2/7)     | H 9.07440 5.12580 3.35135  |
| C 5.34605 5.67352 2.14387  | C 9.00539 1.45415 4.31389  | Fe 6.23014 4.63912 4.92527 | H 1.19415 7.00418 5.51289  |
| H 6.84319 5.66698 7.95988  | C 10.06659 1.98917 3.57029 | N 5.53567 2.56404 4.84520  | H 1.75162 7.17813 6.02304  |
| H 7.44685 4.52891 10.11239 | C 10.03147 3.33431 3.19274 | N 6.79577 3.89948 6.89850  | H 0.43169 5.06046 6.31447  |
| H 7.69922 2.03491 10.12715 | C 8.93881 4.11983 3.56487  | N 8.03231 3.58792 4.29488  | H 1.60384 2.86419 6.10964  |
| H 7.35257 0.76102 7.99984  | C 3.76358 6.06746 5.68537  | N 2.42206 4.92009 5.60000  | H 4.07985 2.25493 0.98879  |
| H 6.63783 0.82837 5.56716  | C 2.42975 6.21908 6.05035  | N 5.49829 4.59912 2.91591  | H 3.7578 4.24207 -0.49331  |
| H 8.94574 0.36369 4.61824  | C 1.64911 5.07609 6.25716  | O 6.92439 6.55595 5.06324  | H 4.61708 6.47941 0.28036  |
| H 10.91341 1.24019 3.34207 | C 2.23145 3.81710 6.09917  | N 6.89850 4.57514 8.05430  | H 5.70878 6.63540 2.52524  |
| H 10.97437 3.66390 2.70462 | C 3.57934 3.71945 5.74299  | C 7.32645 3.91233 9.23612  | H 3.67363 1.66515 2.83554  |
| H 9.04776 5.13181 3.36118  | C 4.26392 2.37419 5.63139  | C 7.45904 2.52022 9.21813  | H 4.56672 2.19968 6.69657  |
| H 4.21587 6.97166 5.57730  | C 5.34544 2.10033 3.39532  |                            | H 4.54990 1.46407 3.34934  |



H 6.26286 1.71252 3.06635  
 O 7.31706 6.52235 4.46991

52

FeO Septet O2-unbound (2/7)

Fe 6.22438 4.66340 5.00289  
 N 5.54837 2.57327 4.81655  
 N 6.78632 3.83409 6.97488  
 N 8.07672 3.64877 4.36045  
 N 4.18212 4.89919 5.66445  
 N 5.53416 4.70240 2.95527  
 O 13.05745 23.30950 5.83139  
 C 6.96277 4.43673 8.17213  
 C 7.27832 3.70583 9.31987  
 C 7.40407 2.31628 9.22258  
 C 7.21501 1.69255 7.98196  
 C 6.90810 2.48257 6.87488  
 C 6.75235 1.92589 5.46040  
 C 7.99835 2.32665 4.67252  
 C 9.01843 1.43575 4.34185  
 C 10.14886 1.92446 3.67320  
 C 10.22461 3.28420 3.35437  
 C 9.16436 4.12088 6.71068  
 C 3.52918 6.07538 5.83762  
 C 2.15369 6.12887 6.05332  
 C 1.43142 4.92971 6.07946  
 C 2.10649 3.71895 5.89839  
 C 3.49101 3.72879 5.69942  
 C 4.27601 2.43295 5.59228  
 C 5.38231 2.26985 3.36001  
 C 5.08437 3.49753 2.51555  
 C 4.42640 3.38381 1.28605  
 C 4.24559 4.52395 0.49769  
 C 4.72147 5.75868 0.95567  
 C 5.35733 5.81101 2.19409  
 H 8.84604 5.51267 8.19501  
 H 7.41807 4.21653 10.26414  
 H 7.64238 1.72369 10.09788  
 H 7.30167 0.61767 7.87903  
 H 8.66294 0.83505 5.49400  
 H 8.93102 0.38662 4.59692  
 H 10.95426 1.25144 3.40404  
 H 11.08418 3.69172 2.83764  
 H 9.17012 5.17850 3.47987  
 H 4.13386 6.97236 5.79428  
 H 1.66303 7.08433 6.18872  
 H 0.35880 4.93732 6.23421  
 H 1.56984 2.77767 5.91148  
 H 4.06379 2.41790 9.95459  
 H 3.73764 4.45084 -0.45687  
 H 4.59666 6.66144 0.37136  
 H 5.73286 6.74035 2.60332  
 H 3.64644 1.65170 5.15315  
 H 4.52232 2.09993 6.60581  
 H 4.59621 1.52097 3.21589  
 H 6.30985 1.82040 2.99060  
 O 13.51757 24.47547 5.86240

66

FeO + CHD React (2/1)

Fe 6.21526 4.36853 4.71321  
 N 5.47366 2.50270 4.91922  
 N 6.69592 4.10201 6.62880  
 N 7.86279 3.37690 4.22184  
 N 4.40350 4.96484 5.25352  
 N 5.59859 4.22677 2.83893  
 O 7.04679 6.01136 4.39430  
 C 6.85753 5.02659 7.59848  
 C 7.18380 4.64184 8.90179  
 C 7.32991 3.28408 9.19881  
 C 7.15355 2.32890 8.18511  
 C 6.84038 2.77364 6.90766  
 C 6.66291 1.90462 5.67316  
 C 7.87276 2.13447 4.78171  
 C 8.92517 1.25313 4.56966  
 C 9.99401 1.67561 3.76394  
 C 9.97495 2.95541 3.20049  
 C 8.88446 3.79306 3.44569  
 C 3.93062 6.23457 5.19697  
 C 2.61534 6.53331 5.54108  
 C 1.76502 5.49688 5.94277  
 C 2.25674 4.18963 5.99356  
 C 3.58671 3.94743 5.64743  
 C 4.20260 5.72226 5.73238  
 C 5.25665 1.91083 3.54458  
 C 5.12150 2.96646 5.50413  
 C 4.58457 2.76056 1.23762  
 C 4.55472 3.80187 3.05044  
 C 5.05991 5.05832 0.66084  
 C 5.57276 5.24236 1.94157  
 H 6.72811 6.05925 7.30368  
 H 7.31904 5.39983 9.66183  
 H 7.57395 2.96591 10.20504  
 H 7.25350 1.27015 8.38753  
 H 6.51020 0.85198 5.91694

H 8.91341 0.26680 5.01533  
 H 10.82831 1.00968 3.58053  
 H 10.78873 3.30508 2.57895  
 H 8.81189 4.79374 3.04208  
 H 4.62662 6.99992 4.88763  
 H 2.26885 7.55714 5.48921  
 H 0.73488 5.70195 6.20782  
 H 1.62217 3.36597 6.29656  
 H 4.20077 1.77873 0.98928  
 H 4.14224 3.63543 -0.68232  
 H 5.05467 5.88449 -0.03803  
 H 5.97770 6.18830 2.27316  
 H 3.50087 1.80721 5.39252  
 H 4.43811 2.34309 6.77583  
 H 4.37698 1.26357 3.55488  
 H 6.11219 1.27559 3.29622  
 H 9.16197 7.72916 6.20250  
 C 10.12990 7.67800 6.72836  
 C 9.92471 7.90389 8.20778  
 C 10.32369 7.04012 9.15342  
 C 11.02620 5.73685 8.85127  
 C 11.20515 5.49675 7.37035  
 C 10.80692 6.36193 6.42517  
 H 10.71862 8.50834 6.30140  
 H 9.42683 8.82876 8.49376  
 H 10.14885 7.26621 10.20378  
 H 12.00767 5.71459 9.35531  
 H 10.46950 4.89784 9.30170  
 H 11.69342 4.56692 7.08394  
 H 10.97362 6.13081 5.37443  
 O 6.90033 7.03470 5.28031

FeO + CHD TS (2/1)

Fe 6.31850 4.35650 4.90260  
 N 5.48273 2.50427 4.99118  
 N 6.68814 3.97927 6.82964  
 N 7.94789 3.30084 4.57103  
 N 4.49791 4.98902 5.37300  
 N 5.78298 4.28511 2.98959  
 O 7.15745 5.94978 4.66290  
 C 6.82284 4.85017 7.85127  
 C 7.04515 4.39387 9.15384  
 C 7.12002 3.01948 9.39556  
 C 6.97093 2.12040 8.32846  
 C 6.75640 2.63553 7.05605  
 C 6.60695 1.82689 5.78262  
 C 7.86903 2.03610 4.95708  
 C 8.88143 1.10712 4.74676  
 C 10.00397 1.50334 4.00432  
 C 10.07583 2.80568 3.49978  
 C 9.02246 3.69084 3.74213  
 C 4.08276 6.27911 5.33516  
 C 2.75587 6.61968 5.58824  
 C 1.83555 5.60582 5.87633  
 C 2.27040 4.27763 5.91101  
 C 3.61382 3.99417 5.66039  
 C 4.17675 2.59670 7.74286  
 C 5.30889 1.96779 3.58997  
 C 5.26483 3.09427 5.86242  
 C 4.77200 2.93037 1.29034  
 C 4.82849 4.00591 0.39892  
 C 5.37502 5.22238 0.82470  
 C 5.84157 5.33247 2.13221  
 H 6.75933 5.89750 7.58942  
 H 7.15516 5.11020 9.95744  
 H 7.28575 2.64631 10.39893  
 H 7.01393 1.05011 8.48573  
 H 6.40101 0.77240 5.97182  
 H 8.79713 0.10390 5.14492  
 H 10.80782 0.80047 3.82226  
 H 10.93117 3.13562 2.92469  
 H 9.01695 4.71006 3.38159  
 H 4.83838 7.01971 5.11623  
 H 2.45460 7.65870 5.55350  
 H 0.79596 5.84381 6.06727  
 H 1.58186 3.47040 6.12890  
 H 4.35464 1.97757 0.98834  
 H 4.45055 3.89628 -0.61052  
 H 5.43618 6.07408 0.15966  
 H 6.27404 6.24132 2.52735  
 H 3.46709 1.86170 5.35565  
 H 4.35534 2.34110 6.79151  
 H 4.40651 1.35425 3.53381  
 H 6.15151 1.30954 3.35690  
 H 8.27709 7.27548 6.13160  
 C 9.41844 7.60796 6.16250  
 C 9.37103 7.71111 7.98452  
 C 9.97138 6.80474 8.79039  
 C 10.77222 5.64984 8.25654  
 C 10.93210 5.66375 6.76218  
 C 10.32888 6.58326 5.97084  
 H 9.45882 8.57274 5.99231  
 H 8.81854 8.54215 8.41450  
 H 9.90820 6.90557 9.87065  
 H 11.76529 5.62863 8.73777

H 10.31186 4.69619 8.57475  
 H 11.58654 4.91280 6.32749  
 H 10.49902 6.57484 4.89811  
 O 7.00843 6.98753 5.65358

FeO + CHD Intermediate (2/1)

Fe 6.31948 4.23142 4.96362  
 O 7.26427 5.76579 4.82823  
 C 6.84730 4.55007 7.93896  
 C 7.05821 4.01636 9.21386  
 C 7.06739 2.62901 9.38394  
 C 6.87014 1.79474 8.27317  
 C 6.67333 2.38488 7.03069  
 C 6.49869 1.65096 5.71134  
 C 7.77805 1.84800 4.91412  
 C 8.75462 0.88988 4.66796  
 C 9.90486 1.27867 3.96508  
 C 10.03977 2.60311 3.53664  
 C 9.01951 3.51735 3.81099  
 C 4.15792 6.22178 5.44279  
 C 2.83935 6.60189 5.68454  
 C 1.87541 5.61404 5.91309  
 C 2.25900 4.26949 5.90222  
 C 3.59545 3.94499 5.66646  
 C 4.10588 2.52603 5.69868  
 C 5.23261 1.95922 3.52391  
 C 5.24813 3.13443 2.57775  
 C 4.76931 3.05732 1.26879  
 C 4.88019 4.17485 0.43600  
 C 5.46527 5.34590 0.93228  
 C 5.91632 5.36989 2.24953  
 H 6.83281 5.61149 7.73280  
 H 7.20674 4.68440 10.05285  
 H 7.22156 2.19639 10.36502  
 H 8.66551 0.71685 8.37427  
 H 6.24280 0.59811 5.84488  
 H 8.62376 -0.12867 5.01076  
 H 10.68225 0.55375 3.75648  
 H 10.91894 2.92835 2.99587  
 H 9.06503 4.55461 3.50933  
 H 4.94693 6.93954 5.27196  
 H 2.57834 7.65241 5.68673  
 H 0.84184 5.88425 6.09344  
 H 1.53540 3.48178 6.07264  
 H 4.32069 2.13832 0.91205  
 H 4.51375 4.13240 -0.58265  
 H 5.56801 6.22820 0.31391  
 H 6.37551 6.24011 2.69754  
 H 3.37568 1.83210 5.27608  
 H 4.26855 2.22261 6.73697  
 H 4.30499 1.38963 3.43110  
 H 6.04912 1.27797 3.26676  
 H 7.95623 7.19015 5.97515  
 C 9.91138 8.09767 6.31826  
 C 9.62993 8.33749 6.97905  
 C 9.98013 7.43073 8.66569  
 C 10.68097 6.13883 8.33637  
 C 10.95922 5.96188 8.86670  
 C 10.58980 6.90128 5.93653  
 H 9.67674 8.85263 5.57477  
 H 9.13171 9.26115 7.97835  
 H 9.76079 7.63032 9.71074  
 H 11.62472 6.06400 8.91094  
 H 10.09075 5.28169 8.71556  
 H 11.47792 5.05808 6.55931  
 H 10.82036 6.74007 4.88711  
 O 7.04584 6.79493 5.90601

66

FeO + CHD React (2/3)

Fe 6.17369 4.30206 4.73268  
 N 5.43039 2.43742 4.87214  
 N 6.63358 3.98118 6.64398  
 N 7.83251 3.34205 4.25983  
 N 4.36312 4.90317 5.24448  
 N 5.59223 4.23301 2.84883  
 O 6.96511 6.02216 4.41847  
 C 6.78231 4.87781 7.64237  
 C 7.06773 4.45291 8.94274  
 C 7.19226 3.08606 9.20550  
 C 7.03429 2.16073 8.16105  
 C 6.75694 2.64365 6.88996  
 C 6.60211 1.81285 5.62678  
 C 7.83055 2.07675 4.76851  
 C 8.89901 1.20718 4.54272  
 C 9.97457 1.66531 3.77867  
 C 9.96710 2.96780 3.26932  
 H 8.87010 3.79337 3.52460  
 C 3.89894 6.17749 5.21174  
 C 5.75756 6.47216 5.53282

C 1.71373 5.42825 5.88550  
 C 2.19740 4.11717 5.91282  
 C 3.53416 3.87755 5.59277  
 C 4.14308 2.49701 5.66031  
 C 5.23544 1.89328 3.47453  
 C 5.11752 3.01382 2.46847  
 C 4.59795 2.82204 1.18772  
 C 4.58475 3.89413 0.29035  
 C 5.08704 5.13766 0.69351  
 C 5.58094 5.27893 1.98668  
 H 6.68022 5.91881 7.36657  
 H 7.19135 5.18820 9.72662  
 H 7.40710 2.73765 10.20837  
 H 7.12025 1.09598 8.33613  
 H 6.44842 0.75269 5.83472  
 H 8.87091 0.20301 4.94617  
 H 10.81381 1.00825 3.58593  
 H 10.79461 3.34351 2.68221  
 H 8.80131 4.49882 3.16157  
 H 4.60737 6.94453 4.93777  
 H 2.23579 7.49938 5.50208  
 H 0.67860 5.63138 6.13196  
 H 1.55165 3.28943 6.17856  
 H 4.21461 1.85069 0.90087  
 H 4.18606 3.76121 -0.70811  
 H 5.09219 5.98594 0.02174  
 H 5.98221 6.21023 2.36157  
 H 3.44402 1.74273 5.29214  
 H 4.35632 2.24704 6.70380  
 H 4.35565 1.24647 3.44724  
 H 6.09492 1.26640 3.21794  
 H 9.13814 7.87877 6.30361  
 C 10.05435 7.81216 6.91315  
 C 9.70004 7.86837 8.38064  
 C 10.05091 6.92390 9.20627  
 C 10.84457 5.69062 8.90203  
 C 11.17300 5.61889 7.42884  
 C 10.82274 6.56465 6.54399  
 H 10.63783 8.70677 6.63481  
 H 9.13115 8.73595 8.71043  
 H 9.76694 7.02810 10.31202  
 H 11.77476 5.65522 9.49482  
 H 10.29245 4.78595 9.20735  
 H 11.73145 4.74534 7.09702  
 H 11.09896 6.45566 5.49655  
 O 6.91353 6.94769 5.42865

66

FeO + CHD TS (2/3)

Fe 6.30998 4.28436 4.92941  
 N 5.43821 2.45792 4.93928  
 N 6.66423 3.81804 6.84114  
 N 7.92300 3.20858 4.45351  
 N 4.49694 4.94914 5.39594  
 N 5.79543 4.31586 3.01824  
 O 7.28984 5.83179 4.83700  
 C 6.84009 4.64460 7.89330  
 C 7.07177 4.13115 9.17276  
 C 7.10842 2.74645 9.35974  
 C 6.91965 1.89439 8.26102  
 C 6.70279 2.46530 7.10177  
 C 6.53584 1.71453 5.70141  
 C 7.80863 1.92571 4.89695  
 C 8.79867 0.98037 4.65426  
 C 9.93761 1.37907 3.93880  
 C 10.04789 2.70045 3.49419  
 C 9.01503 3.60093 3.76650  
 C 4.09999 6.24594 5.38730  
 C 2.77374 6.59990 5.62489  
 C 1.83267 5.95281 5.86547  
 C 2.24703 4.25766 5.86892  
 C 3.59088 3.96099 5.63611  
 C 4.12965 2.55248 5.68686  
 C 5.25741 1.98813 3.51385  
 C 5.25310 3.15708 2.55823  
 C 4.77322 3.06203 1.25064  
 C 4.86838 4.17347 0.40776  
 C 5.44000 5.35633 0.89198  
 C 5.89236 5.39767 2.20835  
 H 6.80396 5.70331 7.67343  
 H 7.21628 4.81119 10.00218  
 H 7.27779 2.32951 10.34512  
 H 6.93732 0.81803 8.37592  
 H 6.29957 0.65860 5.84741  
 H 8.68568 -0.03651 5.00828  
 H 10.72467 0.66410 3.73207  
 H 10.91741 3.03351 2.94257  
 H 9.04149 4.63542 3.45342  
 H 4.87098 6.98066 5.20317  
 H 2.48899 7.64414 5.61482  
 H 0.79319 5.84130 6.04325  
 H 1.54193 3.45534 6.04883  
 H 4.33632 2.13420 9.00224  
 H 4.50108 4.11724 -0.60993  
 H 5.53172 6.23364 0.26481

H 6.34357 6.27793 2.64515  
 H 3.41039 1.83851 5.27853  
 H 4.30087 2.26863 6.72936  
 H 4.33763 1.40483 3.42673  
 H 6.08235 1.31673 3.25738  
 H 8.31852 7.38785 8.16283  
 C 9.41488 7.77456 6.51468  
 C 9.37994 7.93293 7.98684  
 C 10.01517 7.07763 8.81944  
 C 10.84603 5.92816 8.32164  
 C 11.01159 5.90243 6.82818  
 C 10.37247 6.76831 6.00694  
 H 9.43703 8.72524 5.96617  
 H 8.80120 8.75957 8.38995  
 H 9.95631 7.21530 9.89591  
 H 11.83644 5.94257 8.80782  
 H 10.40451 4.97359 8.66418  
 H 11.69737 5.16507 6.41918  
 H 10.54103 6.72906 4.93457  
 O 7.00117 6.86641 5.78993

66

FeO + CHD Inter (2/3)  
 Fe 6.31804 4.23898 4.97164  
 N 5.41808 2.42572 4.93656  
 N 6.65198 3.72847 8.87917  
 N 7.92040 3.14898 4.49189  
 N 4.51494 4.91524 5.43722  
 N 5.82053 4.30640 3.05371  
 O 7.26233 5.77584 4.86187  
 C 6.83357 4.52715 7.95251  
 C 7.04286 3.97969 9.22175  
 C 7.05241 2.59091 9.37766  
 C 6.85843 1.76822 8.25782  
 C 6.66435 2.37138 7.02121  
 C 6.49801 1.65094 5.69345  
 C 7.78171 1.85879 4.09592  
 C 8.76126 0.90509 4.65446  
 C 9.91502 1.30360 3.96288  
 C 10.05064 2.63310 3.55079  
 C 9.02728 3.54235 3.82957  
 C 4.14492 6.21990 5.44748  
 C 8.22254 6.59325 5.67807  
 C 1.86038 5.60015 8.98084  
 C 2.24892 4.25715 5.87470  
 C 3.58887 3.93936 5.65002  
 C 4.10412 2.52225 5.67654  
 C 5.24358 1.97965 5.02039  
 C 5.26908 3.16302 2.56677  
 C 4.80484 3.09662 1.25195  
 C 4.92387 4.22126 0.43002  
 C 5.50234 5.38856 0.94264  
 C 5.93880 5.40174 2.26489  
 H 6.81933 5.90799 7.75786  
 H 7.19112 4.63798 10.07689  
 H 7.20507 2.14863 10.35463  
 H 6.85499 0.68935 8.34748  
 H 6.24334 0.59631 5.81462  
 H 8.62991 -0.11757 4.98452  
 H 10.69459 0.58221 3.75033  
 H 10.93258 2.96612 3.01937  
 H 9.07336 4.58333 3.54087  
 H 4.93287 6.94139 5.28859  
 H 2.55720 7.64260 5.68370  
 H 0.82392 5.86521 6.06220  
 H 1.52661 3.46558 6.03238  
 H 4.36125 2.18024 0.88236  
 H 4.56891 4.18714 -0.59301  
 H 5.61133 6.27613 0.33294  
 H 6.39257 6.26833 2.72529  
 H 3.37878 1.82772 5.24652  
 H 4.26296 2.21340 6.71388  
 H 4.31462 1.41423 3.39787  
 H 6.05938 1.29789 3.24436  
 H 7.92366 7.20190 6.02694  
 C 9.82759 8.17342 4.74961  
 C 9.53301 8.19834 7.87624  
 C 9.94481 7.19012 8.71108  
 C 10.73168 6.00746 8.21017  
 C 11.01986 6.05794 6.73255  
 C 10.58468 7.09071 5.93981  
 H 9.54094 9.00732 5.84690  
 H 8.97412 9.03795 8.28018  
 H 9.71395 7.22588 9.71199  
 H 11.67877 5.91646 8.77683  
 H 10.20114 5.06795 8.46062  
 H 11.59849 5.24350 6.30595  
 H 10.82338 7.09365 4.87986  
 O 7.01970 6.79557 5.94360

66

FeO + CHD React QI (2/5)  
 Fe 6.19231 4.46371 4.76574  
 N 5.41279 2.54667 4.88493  
 N 6.73292 4.06000 6.67952

N 7.96413 3.22850 4.24257  
 N 4.16880 4.96342 5.33960  
 N 5.63211 4.38537 2.84960  
 O 7.09422 6.16373 4.50071  
 C 6.96698 4.92995 7.68461  
 C 7.26900 4.47342 8.96953  
 C 7.31987 3.09727 9.20847  
 C 7.07299 2.19942 8.15837  
 C 6.78247 2.71091 6.89925  
 C 6.56113 1.87831 5.64388  
 C 7.81166 1.99419 4.78617  
 C 8.75472 0.98819 4.60205  
 C 9.89348 1.28028 3.83612  
 C 10.04725 2.55561 3.28264  
 C 9.05469 3.51527 3.50079  
 C 3.60921 6.19902 5.33270  
 C 2.24918 6.38027 5.57157  
 C 1.44959 5.25626 5.81355  
 C 2.03301 3.98524 5.82158  
 C 3.40478 3.86995 5.58857  
 C 4.12955 2.54822 3.48726  
 C 5.21036 2.04238 3.47104  
 C 5.12891 3.17409 2.47283  
 C 4.61759 2.99377 1.18697  
 C 4.64213 4.06226 0.28476  
 C 5.17595 5.29379 0.68410  
 C 5.66258 5.42591 1.98073  
 H 6.90304 5.98147 7.43574  
 H 7.46061 5.18904 9.75773  
 H 7.54483 2.72104 10.19901  
 H 7.10192 1.12945 8.32004  
 H 6.32891 0.83768 5.88005  
 H 8.60807 0.00855 5.03959  
 H 10.64665 0.51867 3.67432  
 H 10.91686 2.80607 2.68898  
 H 9.11698 4.51440 3.08962  
 H 4.27257 7.03035 5.13479  
 H 1.82808 7.37722 5.56172  
 H 0.38669 5.36728 5.99178  
 H 1.43777 3.09975 6.00815  
 H 4.21182 2.03227 0.89795  
 H 4.24908 3.93463 -0.71664  
 H 5.21127 6.13759 0.00775  
 H 6.08521 6.34961 2.35053  
 H 3.49126 1.72338 5.35639  
 H 4.37941 2.36125 6.73147  
 H 4.30998 1.42501 3.42702  
 H 6.04997 1.39258 3.20679  
 H 8.98650 7.92399 6.44913  
 C 9.96051 7.87753 9.66500  
 C 9.74975 7.84492 8.46035  
 C 10.22691 6.87612 9.25639  
 C 11.03143 5.70081 8.75198  
 C 11.22500 5.72258 7.25371  
 C 10.74982 6.69333 6.45853  
 H 10.46723 8.81527 6.67879  
 H 9.18045 8.66764 8.88926  
 H 10.04441 6.91598 10.32885  
 H 12.01292 5.67500 9.25572  
 H 10.54591 4.75741 9.05379  
 H 11.79185 4.89831 6.82450  
 H 10.93406 6.65435 5.38626  
 O 6.80370 7.08125 5.45969

66

FeO + CHD TS QI (2/5)  
 Fe 6.29706 4.53512 4.99788  
 N 5.47100 2.60891 4.99965  
 N 6.70564 4.00466 6.97381  
 N 8.07605 3.25366 4.55836  
 N 4.23487 5.03149 5.41852  
 N 5.85259 4.48081 3.00266  
 O 6.98766 6.25810 4.80930  
 C 6.88413 4.80201 8.04797  
 C 7.07578 4.26252 9.32274  
 C 7.07329 2.87392 9.48080  
 C 6.88052 2.05013 8.36158  
 C 6.69977 2.64709 7.11814  
 C 6.54645 1.88640 5.80782  
 C 7.85606 2.00520 5.04404  
 C 8.78087 0.97745 4.88151  
 C 9.97011 1.25744 4.19249  
 C 10.19092 2.54436 3.69089  
 C 9.21632 3.52660 3.88954  
 C 3.69732 6.27517 5.38534  
 C 2.32464 6.47577 5.51733  
 C 1.49099 5.36105 5.67267  
 C 2.05237 4.08017 5.70459  
 C 3.43727 3.94634 5.58283  
 C 4.13684 2.61414 5.70677  
 C 5.35611 2.13935 3.56618  
 C 5.35408 3.28706 2.58074  
 C 4.91370 3.12940 1.26436  
 C 5.00551 4.20902 0.38011  
 C 5.53085 5.42767 0.82854

C 5.94182 5.53245 2.15455  
 H 6.87005 5.86605 7.85127  
 H 7.22107 4.92229 10.16815  
 H 7.21433 2.43221 10.45992  
 H 6.86769 0.97165 8.45723  
 H 6.27884 0.84100 5.98070  
 H 8.58016 -0.01123 5.27543  
 H 10.70894 0.47841 4.04763  
 H 11.09819 2.78661 3.15244  
 H 9.33270 4.53621 3.51869  
 H 4.39170 7.09450 5.25460  
 H 1.91984 7.47934 5.49051  
 H 0.41875 5.48671 5.76577  
 H 1.43022 3.20148 5.82428  
 H 4.50908 2.17854 0.93957  
 H 4.66862 4.10115 -0.64406  
 H 5.61418 6.28074 0.16777  
 H 6.34460 6.44495 2.57605  
 H 3.50987 1.80212 5.32850  
 H 4.31228 2.41103 6.76763  
 H 4.45395 1.53369 3.44674  
 H 6.20351 1.48402 3.34347  
 H 8.28004 7.41318 6.34078  
 C 9.42283 7.74014 6.61566  
 C 9.56536 7.61003 8.08136  
 C 10.29121 6.61898 8.64893  
 C 11.04774 5.60456 7.83957  
 C 11.02477 5.86688 6.36097  
 C 10.29563 6.86588 5.80739  
 H 9.37638 8.77778 6.26086  
 H 9.04722 8.33387 8.70426  
 H 10.36510 6.54402 9.73046  
 H 12.09167 5.54591 8.19252  
 H 10.65102 4.59258 8.04490  
 H 11.64696 5.23202 5.73606  
 H 10.32843 7.03740 4.73523  
 O 6.91577 7.08396 5.96728

66

FeO + CHD Interm QI (2/5)  
 Fe 6.26398 4.48048 5.01262  
 N 5.44790 2.57355 4.96944  
 N 6.66774 3.91613 6.96721  
 N 8.04850 3.22255 4.54848  
 N 4.20890 4.96873 5.44583  
 N 5.82544 4.48585 3.03289  
 O 6.92247 6.17525 4.83733  
 C 6.84060 4.69074 8.06082  
 C 7.03119 4.12304 9.32323  
 C 7.03644 2.73157 9.45211  
 C 6.85146 1.93185 8.31462  
 C 6.66966 2.55472 7.08461  
 C 6.52194 1.82402 5.75899  
 C 7.83334 1.96201 5.00247  
 C 8.76562 0.94441 4.82520  
 C 9.95828 1.25048 4.14969  
 C 10.17497 2.55134 3.68314  
 C 9.19184 3.52203 3.89692  
 C 6.37938 6.21572 5.43994  
 C 2.31000 6.41983 5.59744  
 C 1.47405 5.30593 5.74909  
 C 2.02825 4.02131 5.74790  
 C 3.41018 3.88424 5.60070  
 C 4.11132 2.55016 5.67940  
 C 5.33266 2.13258 3.52420  
 C 5.33342 3.30367 2.57081  
 C 4.90285 3.18556 1.24771  
 C 4.99704 4.29254 0.39824  
 C 5.51399 5.49860 0.88833  
 C 9.91571 5.56469 2.21938  
 H 6.82822 5.75792 7.88684  
 H 7.16930 4.76555 10.18304  
 H 7.17776 2.26976 10.42181  
 H 6.84497 0.85148 8.38571  
 H 6.24825 0.77608 5.90197  
 H 8.56937 -0.05503 5.19016  
 H 10.70380 0.48050 3.99154  
 H 11.08563 2.81289 3.15975  
 H 9.30244 4.54176 3.55266  
 H 4.37675 7.03172 5.30363  
 H 1.90880 7.42515 5.59336  
 H 0.40422 5.43521 5.86252  
 H 1.40295 3.14397 5.86057  
 H 4.50396 2.24389 0.89112  
 H 4.66785 4.21533 -0.63113  
 H 5.98000 6.37233 0.25536  
 H 6.30982 6.46533 2.67296  
 H 3.48927 1.74917 5.27168  
 H 4.28899 2.30967 6.73183  
 H 4.43005 1.53080 3.39282  
 H 6.18029 1.48214 3.28926  
 H 8.05426 7.15137 6.11522  
 H 10.00117 8.02731 6.44618  
 C 9.84497 8.03033 7.86547  
 H 10.26781 6.97377 8.63153

C 10.91921 5.75789 8.02767  
 C 11.07347 5.83587 6.53189  
 C 10.63395 6.91768 5.80957  
 H 9.70993 8.89581 5.86442  
 H 9.38428 8.89155 8.34106  
 H 10.14364 6.99240 9.71047  
 H 11.90510 5.58302 8.50023  
 H 10.34783 4.84942 8.30211  
 H 11.55715 5.00134 6.03254  
 H 10.77479 6.94048 4.73251  
 O 7.07591 6.96253 6.09574

66

FeO + CHD React QIII (2/5)  
 Fe 6.39675 4.16188 5.85118  
 N 5.49751 2.37312 4.92814  
 N 9.52592 2.93833 7.56767  
 N 8.08529 2.82383 5.69385  
 N 4.35514 4.76973 5.92836  
 N 6.61744 4.66245 3.80722  
 O 7.05913 5.68380 6.76157  
 C 5.71119 3.33999 8.83995  
 C 5.40115 2.41861 9.84243  
 C 5.30657 1.06274 9.51250  
 C 5.52978 0.65382 8.18967  
 C 5.84125 1.62084 7.23871  
 C 6.18787 1.32719 5.78468  
 C 7.69074 1.52282 5.62746  
 C 8.61282 0.48958 5.49028  
 C 9.97610 0.81255 5.42511  
 C 10.37311 2.15136 5.49859  
 C 9.39814 3.14249 5.62989  
 C 3.92944 6.03677 5.96587  
 C 2.61016 6.41480 5.73342  
 C 1.71317 5.23440 5.23440  
 C 2.15781 4.15917 4.99373  
 C 3.49010 3.83247 5.25879  
 C 4.00688 2.41943 5.11339  
 C 5.89961 2.33417 3.47974  
 C 6.22212 3.70547 2.92682  
 C 6.18373 3.96956 1.55534  
 C 6.57435 5.22894 1.09070  
 C 6.99396 6.20155 2.00693  
 C 6.99920 5.88811 3.36300  
 H 5.79507 4.40092 9.03972  
 H 5.23702 2.76132 10.85575  
 H 5.06153 3.02993 10.27173  
 H 5.46164 -0.38938 7.90762  
 H 5.89059 0.31238 5.50667  
 H 8.27786 -0.53868 5.43441  
 H 10.71427 0.02709 5.31692  
 H 11.41820 2.42890 5.45305  
 H 9.65302 4.19386 5.68612  
 H 4.66376 6.73464 6.34698  
 H 2.29794 7.43176 5.93262  
 H 0.68279 5.73103 5.03411  
 H 1.48382 3.40356 6.09000  
 H 5.85475 3.20090 0.86681  
 H 6.54937 5.44874 0.03004  
 H 7.30439 7.18563 1.68049  
 H 7.30642 6.60541 4.11390  
 H 3.50706 1.91206 4.28325  
 H 3.75042 1.86234 6.02005  
 H 5.11414 1.85937 2.88006  
 H 6.88868 1.70354 3.38163  
 H 8.00033 7.93476 7.43219  
 C 9.65954 8.28092 6.83457  
 C 10.62649 7.14221 6.31409  
 C 11.06185 6.76274 5.40182  
 C 10.63187 7.42714 4.11498  
 C 9.60710 8.51619 4.33136  
 C 9.17302 8.89551 5.54359  
 H 10.13313 9.05581 7.46191  
 H 10.98506 6.62846 7.50410  
 H 11.77594 5.94580 5.31288  
 H 11.51316 7.84123 3.59555  
 H 10.23516 6.67152 3.41679  
 H 9.22598 9.01014 3.43936  
 H 8.43955 9.69486 5.63132  
 O 6.69515 6.52121 7.73147

66

FeO + CHD TS QIII (2/5)  
 Fe 6.52197 4.15136 5.50789  
 N 5.36733 2.34701 4.86745  
 N 6.25067 3.06664 7.37132  
 N 8.08164 2.66002 5.18980  
 N 4.49847 4.87087 5.67061  
 N 6.43284 4.47666 3.40567  
 O 7.43768 5.69186 6.10875  
 C 6.25699 3.56595 8.62660  
 C 6.03453 2.73992 9.73098  
 C 5.79494 1.37782 9.52133  
 C 5.78861 0.86791 8.21489  
 C 6.02336 1.74356 7.51793



|                           |         |          |                              |         |          |            |          |          |                           |          |          |
|---------------------------|---------|----------|------------------------------|---------|----------|------------|----------|----------|---------------------------|----------|----------|
| H 3.56101                 | 1.90091 | 5.14480  | N 4.39902                    | 5.21011 | 5.65583  | H 6.42551  | 5.84126  | 8.50702  | H 6.05125                 | 6.30320  | 2.41313  |
| H 4.23663                 | 2.35060 | 6.69956  | N 5.83167                    | 4.75120 | 3.14037  | H 6.81281  | 4.55140  | 10.62159 | H 3.35645                 | 1.92403  | 5.36014  |
| H 4.75737                 | 1.63809 | 3.40854  | O 7.00534                    | 6.97059 | 6.21261  | H 7.14354  | 2.07003  | 10.47667 | H 4.27329                 | 2.42397  | 6.77110  |
| H 6.49369                 | 1.88517 | 3.39993  | C 6.67118                    | 4.69510 | 8.41925  | H 7.07012  | 0.96129  | 8.23169  | H 4.26066                 | 1.39616  | 3.51811  |
| H 8.77165                 | 7.79048 | 7.43006  | C 6.77132                    | 4.01648 | 9.63558  | H 6.60236  | 1.20198  | 5.75581  | H 6.00272                 | 1.34730  | 3.30977  |
| C 9.86171                 | 7.89548 | 7.55841  | C 6.84282                    | 2.62011 | 9.63110  | H 8.99368  | 0.83293  | 5.02055  | H 9.28150                 | 7.75700  | 6.17691  |
| C 10.37090                | 6.84439 | 8.51677  | C 6.80808                    | 1.93150 | 8.41037  | H 11.04441 | 1.80864  | 3.96279  | C 10.24987                | 7.62161  | 6.68637  |
| C 11.35148                | 5.97974 | 8.21661  | C 6.70888                    | 2.66792 | 7.23325  | H 11.10199 | 4.26601  | 3.45806  | C 10.07228                | 7.78502  | 8.17750  |
| C 12.06271                | 5.95340 | 6.88398  | C 6.69544                    | 2.06172 | 5.83880  | H 9.11913  | 5.66654  | 4.03237  | C 10.42351                | 6.85123  | 9.07404  |
| C 11.52432                | 6.97607 | 5.91097  | C 8.03422                    | 2.36454 | 5.18015  | H 4.01160  | 7.30295  | 5.81644  | C 11.04169                | 5.52434  | 8.69925  |
| C 10.54308                | 7.84087 | 6.21154  | C 9.05083                    | 1.43477 | 4.98327  | H 1.53971  | 7.39435  | 6.07802  | C 11.19533                | 5.35041  | 7.20580  |
| H 9.98893                 | 8.89857 | 8.00111  | C 10.25507                   | 1.87054 | 4.41163  | H 0.24740  | 5.23074  | 6.12889  | C 10.84219                | 6.28393  | 6.30868  |
| H 9.90254                 | 6.81405 | 9.49891  | C 10.40503                   | 3.21508 | 4.05584  | H 1.49394  | 3.07591  | 5.91774  | H 10.88400                | 8.43498  | 6.29314  |
| H 11.67598                | 5.24920 | 8.95541  | C 9.34549                    | 4.09758 | 4.27734  | H 4.42024  | 2.87683  | 1.06407  | H 9.63421                 | 8.72271  | 8.51528  |
| H 13.14460                | 6.11220 | 7.03336  | C 3.86600                    | 6.45467 | 5.76047  | H 4.14419  | 4.96290  | -0.28303 | H 10.27011                | 7.03353  | 10.13632 |
| H 11.99462                | 4.94474 | 6.44297  | C 2.49707                    | 6.64454 | 5.92350  | H 4.83479  | 7.16084  | 0.72179  | H 12.02319                | 5.41562  | 9.19229  |
| H 11.98050                | 6.99501 | 4.92280  | C 1.66084                    | 5.52170 | 5.96848  | H 5.74171  | 7.18452  | 3.04605  | H 10.43661                | 4.69970  | 9.11245  |
| H 10.20555                | 8.55848 | 5.46613  | C 2.21788                    | 4.24444 | 5.85867  | H 3.65765  | 1.98471  | 5.20370  | H 11.62415                | 4.40837  | 6.86790  |
| O 7.36776                 | 6.68391 | 4.93727  | C 3.60149                    | 4.11246 | 5.70919  | H 4.38997  | 2.41317  | 6.73975  | H 10.98401                | 6.09805  | 5.24556  |
|                           |         |          | C 4.26392                    | 2.75154 | 5.67063  | H 4.75875  | 1.91356  | 3.36956  | O 6.94589                 | 7.01163  | 5.47855  |
| 66                        |         |          | C 5.59643                    | 2.36388 | 3.59673  | H 6.47575  | 2.26242  | 3.27996  | Cl 4.51008                | 9.35279  | 4.44488  |
| FeO + CHD TS sideon (2/7) |         |          | C 5.40549                    | 3.54766 | 2.68167  | H 8.79897  | 7.68454  | 7.91714  | O 4.40566                 | 9.33116  | 3.96877  |
| Fe 6.48232                | 4.92540 | 5.28482  | C 4.87239                    | 3.41466 | 1.39666  | C 9.87187  | 7.67621  | 8.17216  | O 5.79836                 | 8.65458  | 2.01722  |
| N 5.66039                 | 2.82271 | 5.08384  | C 4.79526                    | 4.54007 | 0.57115  | C 10.23195 | 6.36748  | 8.83585  | O 3.31570                 | 8.62630  | 1.84451  |
| N 6.64094                 | 4.07324 | 7.30335  | C 5.24584                    | 5.77581 | 1.05150  | N 11.19556 | 5.54856  | 8.38778  | O 4.52975                 | 10.79243 | 1.95955  |
| N 8.22920                 | 3.71226 | 4.90556  | C 5.75290                    | 5.84925 | 2.34653  | C 12.03839 | 5.83905  | 7.16797  | Cl 10.74665               | 6.74905  | 1.68087  |
| N 4.40784                 | 5.25746 | 5.64780  | H 6.60325                    | 5.77251 | 8.36471  | C 11.65951 | 7.13417  | 6.48865  | O 10.83883                | 8.08126  | 2.40836  |
| N 5.87785                 | 4.79027 | 3.16540  | H 6.78972                    | 4.57552 | 10.56212 | H 6.78972  | 4.57552  | 10.56212 | O 11.42806                | 6.85543  | 0.32533  |
| O 6.98466                 | 6.91253 | 6.16831  | H 6.91785                    | 2.07111 | 10.56199 | H 9.98805  | 8.50500  | 8.89163  | O 11.43508                | 5.66645  | 2.51129  |
| C 6.62501                 | 4.74029 | 8.47857  | H 6.84945                    | 0.84991 | 8.37597  | H 9.66610  | 6.10190  | 9.72698  | O 9.27976                 | 6.37469  | 1.48359  |
| C 6.69531                 | 4.06358 | 9.69834  | H 6.51762                    | 0.98356 | 5.88406  | H 11.40819 | 4.62098  | 8.91643  |                           |          |          |
| C 6.78014                 | 2.66775 | 9.69589  | H 8.90653                    | 0.39905 | 5.26417  | H 13.10586 | 5.86069  | 7.44733  | 76                        |          |          |
| C 6.78246                 | 1.97935 | 8.47474  | H 11.06162                   | 1.16672 | 4.24537  | H 11.96121 | 5.00436  | 6.45122  | FeO+CHD+CI TS sideon(0/1) |          |          |
| C 6.70818                 | 2.71599 | 7.29522  | H 11.32338                   | 3.57796 | 3.61282  | H 12.21834 | 7.39490  | 5.59173  | Fe 6.33100                | 4.38588  | 4.86760  |
| C 6.71793                 | 2.10960 | 5.90090  | H 9.40314                    | 5.14866 | 4.02869  | H 10.47403 | 8.87355  | 6.40012  | N 5.42435                 | 2.56777  | 4.96800  |
| C 8.06499                 | 2.40942 | 5.25781  | H 4.56198                    | 7.28153 | 5.71361  | O 7.25443  | 6.95343  | 5.18001  | N 6.72428                 | 3.98610  | 6.79135  |
| C 9.07449                 | 1.47056 | 5.06427  | H 2.09714                    | 7.64681 | 6.00630  | Cl 3.67344 | 9.88642  | 4.07176  | N 7.90515                 | 3.26432  | 4.38499  |
| C 10.28079                | 1.89264 | 4.48747  | O 5.99001                    | 5.63929 | 6.08475  | O 4.97458  | 9.12215  | 4.31889  | N 4.54800                 | 5.08673  | 5.36793  |
| C 10.43895                | 3.23359 | 4.12165  | H 1.59230                    | 3.36059 | 5.89008  | O 3.00180  | 9.35324  | 2.81433  | N 5.74817                 | 4.34895  | 2.97036  |
| C 9.38756                 | 4.12578 | 4.34470  | H 4.52672                    | 2.44711 | 1.05337  | O 2.74620  | 9.69390  | 5.26727  | O 6.21932                 | 5.94905  | 4.61997  |
| C 3.86049                 | 6.49740 | 5.72336  | H 4.38539                    | 4.45524 | -0.42834 | O 9.98065  | 11.36515 | 3.90043  | C 9.91176                 | 4.84439  | 7.81663  |
| C 2.48597                 | 6.67904 | 5.84660  | H 5.19781                    | 6.66791 | 0.44032  | Cl 9.25570 | 7.72036  | 1.56876  | C 7.12920                 | 4.37038  | 9.11411  |
| C 1.65753                 | 5.55021 | 5.88377  | H 6.09840                    | 6.77641 | 2.78357  | O 10.20732 | 8.44390  | 0.62865  | C 7.14619                 | 2.99264  | 9.34818  |
| C 2.22850                 | 4.27683 | 5.80634  | H 3.62244                    | 2.03778 | 5.14534  | O 8.92633  | 6.34633  | 1.00243  | C 6.94483                 | 2.10788  | 8.27812  |
| C 3.61704                 | 4.15517 | 5.69511  | H 4.35851                    | 2.38444 | 6.69744  | O 9.92229  | 7.55547  | 2.93396  | C 6.73625                 | 2.63964  | 7.01121  |
| C 4.29009                 | 2.79881 | 5.69531  | H 4.81609                    | 1.61462 | 3.43031  | O 7.97608  | 8.53171  | 1.72296  | C 6.53338                 | 1.84361  | 5.73313  |
| C 5.64802                 | 2.40579 | 3.64485  | H 6.54852                    | 1.88356 | 3.35097  |            |          |          | C 7.78836                 | 2.00441  | 4.89083  |
| C 5.44855                 | 3.58251 | 2.71211  | H 7.93887                    | 7.17685 | 6.50640  |            |          |          | C 8.76062                 | 1.03724  | 4.66586  |
| C 4.90628                 | 3.43472 | 1.44120  | C 6.69674                    | 8.07215 | 7.31830  |            |          |          | C 9.88563                 | 1.38973  | 3.90412  |
| C 4.82255                 | 4.55078 | 6.00373  | C 9.83620                    | 7.19995 | 8.43720  |            |          |          | C 9.99598                 | 2.68623  | 3.39342  |
| C 5.27698                 | 5.79128 | 1.06755  | C 10.71306                   | 6.14589 | 8.39596  |            |          |          | C 8.97905                 | 3.61124  | 3.64659  |
| C 5.79354                 | 5.87761 | 2.35857  | C 11.55846                   | 5.85584 | 7.18419  |            |          |          | C 4.18460                 | 6.39148  | 5.31481  |
| H 6.54655                 | 5.81703 | 8.42167  | C 11.33599                   | 6.81914 | 6.04821  |            |          |          | C 2.87461                 | 6.78703  | 5.57831  |
| H 6.68103                 | 4.62246 | 10.62516 | C 10.44353                   | 7.85826 | 6.13758  |            |          |          | C 1.92031                 | 5.81486  | 5.89626  |
| H 6.83457                 | 2.11932 | 10.62862 | H 9.03401                    | 8.94852 | 7.40157  |            |          |          | C 2.30210                 | 4.47004  | 5.94169  |
| H 6.83065                 | 0.89793 | 8.44155  | H 9.25754                    | 7.38544 | 9.33783  |            |          |          | C 3.62887                 | 4.12984  | 5.67423  |
| H 6.54176                 | 1.03083 | 5.94607  | H 10.82939                   | 5.49334 | 9.25652  |            |          |          | C 4.13599                 | 2.70967  | 5.74298  |
| H 8.92109                 | 0.43702 | 5.34876  | H 12.62955                   | 5.84822 | 7.46624  |            |          |          | C 5.20794                 | 2.04498  | 3.56754  |
| H 11.08091                | 1.18122 | 4.32213  | H 11.38603                   | 4.81758 | 6.84058  |            |          |          | C 5.18019                 | 3.71906  | 2.57118  |
| H 11.35670                | 3.58569 | 3.66848  | H 11.92351                   | 6.67557 | 5.14586  |            |          |          | C 4.64571                 | 3.04383  | 1.28893  |
| H 9.45086                 | 5.17477 | 4.08919  | H 10.32561                   | 8.54134 | 5.30105  |            |          |          | C 4.70634                 | 4.12845  | 0.40778  |
| H 4.55192                 | 7.32869 | 5.68700  | O 7.17466                    | 6.60013 | 4.74634  |            |          |          | C 5.29568                 | 5.32425  | 0.83237  |
| H 2.07627                 | 7.67912 | 5.90607  |                              |         |          |            |          |          | C 5.80717                 | 5.40664  | 2.12611  |
| H 0.58298                 | 5.66021 | 9.69679  | 76                           |         |          |            |          |          | H 6.89418                 | 5.89396  | 7.56029  |
| H 1.61005                 | 3.38775 | 5.83362  | FeO+CHD+CI React sideon(0/7) |         |          |            |          |          | H 7.27856                 | 5.07677  | 9.92040  |
| H 4.55882                 | 2.46318 | 1.11085  | Fe 6.18330                   | 5.07857 | 5.34505  |            |          |          | H 7.30741                 | 2.60664  | 10.34774 |
| H 4.40547                 | 4.45495 | -0.39188 | N 5.55198                    | 2.97061 | 5.05345  |            |          |          | H 6.94308                 | 1.03573  | 8.42882  |
| H 5.22518                 | 6.67667 | 0.44679  | N 6.54526                    | 4.16248 | 7.28876  |            |          |          | H 6.28902                 | 0.79715  | 5.92694  |
| H 6.14475                 | 6.80889 | 2.78215  | N 8.03478                    | 4.06678 | 4.82375  |            |          |          | H 8.64478                 | 0.03892  | 5.06876  |
| H 3.66070                 | 2.06904 | 5.17655  | N 4.09139                    | 5.21981 | 5.76034  |            |          |          | H 10.66004                | 0.65665  | 3.71279  |
| H 4.37107                 | 2.45501 | 6.73126  | N 5.60423                    | 5.11759 | 3.28918  |            |          |          | H 10.85050                | 2.99353  | 2.80530  |
| H 4.87973                 | 1.64468 | 3.47365  | O 6.49978                    | 6.98009 | 6.31333  |            |          |          | H 9.01044                 | 4.62167  | 3.26488  |
| H 6.60863                 | 1.93814 | 3.40798  | C 6.57563                    | 4.77058 | 8.49628  |            |          |          | H 4.95462                 | 7.10501  | 5.06133  |
| H 8.18568                 | 7.15669 | 6.75323  | C 6.79188                    | 4.04113 | 9.66736  |            |          |          | H 2.61842                 | 7.36351  | 5.51777  |
| C 9.28065                 | 7.62499 | 7.23752  | C 6.97656                    | 2.65769 | 9.58204  |            |          |          | H 0.89316                 | 6.09566  | 6.09687  |
| C 9.71649                 | 6.73146 | 8.31594  | C 6.93856                    | 2.03188 | 8.32796  |            |          |          | H 1.58355                 | 3.69396  | 6.17591  |
| C 10.79591                | 5.91897 | 8.18406  | C 6.71952                    | 2.81661 | 7.19956  |            |          |          | H 4.19042                 | 2.10749  | 0.99003  |
| C 11.65085                | 5.91227 | 6.95153  | C 6.70086                    | 2.29075 | 5.77266  |            |          |          | H 4.29464                 | 4.04146  | -0.59073 |
| C 11.25419                | 6.92840 | 5.92298  | C 7.98862                    | 2.73397 | 5.92421  |            |          |          | H 5.35310                 | 6.18799  | 0.18295  |
| C 10.16604                | 7.73275 | 6.07464  | C 9.05566                    | 1.89126 | 4.79983  |            |          |          | H 6.26269                 | 6.30791  | 2.51127  |
| H 8.82781                 | 8.56782 | 7.56830  | C 10.20050                   | 2.44294 | 4.20616  |            |          |          | H 3.39070                 | 2.00662  | 5.36318  |
| H 9.14352                 | 6.72916 | 9.23848  | C 10.23770                   | 3.81151 | 3.92483  |            |          |          | H 4.32268                 | 2.43967  | 6.78658  |
| H 11.09036                | 5.26128 | 8.99691  | C 9.13265                    | 4.60555 | 4.24512  |            |          |          | H 4.28532                 | 1.46089  | 3.52505  |
| H 12.70965                | 6.05956 | 7.22986  | C 3.42278                    | 6.39718 | 5.86721  |            |          |          | H 6.02527                 | 1.36213  | 3.31676  |
| H 11.64988                | 4.90226 | 6.50017  | C 2.03776                    | 6.43659 | 6.00708  |            |          |          | H 8.47834                 | 7.16779  | 6.05783  |
| H 11.88734                | 7.02517 | 5.04722  | C 1.32648                    | 5.23107 | 6.02974  |            |          |          | C 9.65021                 | 7.44227  | 6.39691  |
| H 9.92694                 | 8.47460 | 5.31899  | C 2.02015                    | 4.02288 | 5.91164  |            |          |          | C 9.59708                 | 7.81516  | 7.82418  |
| O 7.26889                 | 6.66795 | 4.74333  | C 3.41103                    | 4.04375 | 5.78086  |            |          |          |                           |          |          |

H 10.23508 4.88169 8.97453  
H 11.54769 4.56811 6.75996  
H 10.64422 6.03737 5.02388  
O 7.17510 6.96083 5.64694  
Cl 4.73027 9.44276 2.57159  
O 4.63663 9.44763 4.09574  
O 6.01411 8.73711 2.14469  
O 3.52996 8.70841 1.99205  
O 4.74660 10.87469 2.06120  
Cl 10.66535 6.76680 1.72320  
O 10.60477 8.07128 2.50470  
O 11.44019 6.97751 0.43181  
O 11.36705 5.70103 2.56607  
O 9.25056 6.29850 1.39750

76

FeO+CHD+CI Interm sideon(0/1)

Fe 6.31545 4.21070 4.91372  
N 5.32846 2.44397 4.88611  
N 6.68047 3.66036 6.80591  
N 7.84319 3.04764 4.36569  
N 4.56699 4.96924 5.44218  
N 5.75347 4.33347 3.01839  
O 7.33436 5.69616 4.80013  
C 6.92751 4.43505 7.88402  
C 7.14059 3.86165 9.14110  
C 7.08828 4.47205 9.28036  
C 6.82648 1.67472 8.15622  
C 6.62949 2.30287 6.93249  
C 6.39046 1.60851 6.50257  
C 7.65904 1.76264 4.77949  
C 8.58614 0.76683 4.49651  
C 9.73717 1.11640 3.77326  
C 9.91835 2.43922 3.35942  
C 8.94427 3.39327 3.66741  
C 4.26266 6.29015 5.46270  
C 2.96690 6.72770 7.31746  
C 1.96512 5.78302 9.57966  
C 2.28609 4.42186 5.94691  
C 3.60028 4.03865 5.67742  
C 4.04192 2.59585 5.66480  
C 5.09454 2.02543 3.45190  
C 5.14021 3.22099 2.53223  
C 4.62594 3.19653 1.23507  
C 4.75290 4.33387 0.43085  
C 5.38588 5.47056 0.94570  
C 5.87534 5.44266 2.25014  
H 6.95969 5.50053 7.70161  
H 7.33969 4.50093 9.99151  
H 7.24434 2.01032 10.24783  
H 6.77322 0.59606 8.23251  
H 6.08800 0.56599 5.72021  
H 8.41756 -0.25028 4.82722  
H 10.47761 0.36134 3.53798  
H 10.79540 2.74531 2.80470  
H 9.03272 4.42584 3.36092  
H 5.07111 6.97958 5.27145  
H 2.75934 7.78960 5.73127  
H 0.94823 6.09747 6.17995  
H 1.52985 3.66677 6.12406  
H 4.13522 2.30411 0.86606  
H 4.35817 4.33288 -0.57820  
H 5.49423 6.37216 0.35710  
H 6.36226 6.29443 2.70310  
C 3.26910 1.94991 5.24111  
H 4.21166 2.25645 6.69079  
H 4.14000 1.50041 3.36804  
H 5.87370 1.31450 3.16191  
H 8.09941 7.11081 5.90489  
C 10.11801 7.94315 6.02002  
C 9.75842 8.60003 7.23497  
C 9.96954 8.00975 8.45634  
C 10.59584 6.64597 8.58789  
C 10.96495 6.02316 7.26667  
C 10.73237 6.65533 6.07078  
H 9.98975 8.44059 5.06429  
H 9.31022 9.58876 7.18544  
H 6.68953 8.52393 9.37150  
H 11.48784 6.70169 9.24221  
H 9.91933 5.97118 9.14852  
H 11.43710 5.04467 7.28889  
H 11.01923 6.17704 5.13850  
O 7.19129 6.70558 5.90905  
Cl 4.99707 9.49955 2.98868  
O 4.82659 9.44085 4.50469  
O 6.26790 8.75376 2.59226  
O 3.79601 8.84912 2.31733  
O 5.10433 10.95062 2.54775  
Cl 10.74524 6.49831 1.75207  
O 10.83922 7.85320 2.44021  
O 11.46066 6.55419 0.41085  
O 11.40179 5.43295 2.63054  
O 9.27934 6.13753 1.53243

### [(TMC)FeO]<sup>2+</sup> (3)

52

FeO syn (2/3)

Fe -0.06375 0.08747 -0.04494  
H 1.70767 -1.60981 -3.71189  
H -0.66835 -1.29297 -3.69455  
H -1.53514 0.98066 -3.64663  
H 1.44204 0.10664 -3.59275  
C 1.33748 -0.82895 -3.03634  
H -0.04632 1.59601 -2.89806  
C -0.12218 -1.15953 -2.75225  
C -1.02324 1.16989 -2.69694  
H -2.86898 -0.62383 -2.60437  
H 1.74471 1.75706 -2.27454  
H -0.18454 -2.10154 -2.19751  
H 3.28175 -0.73916 -2.09702  
H -1.59096 1.88569 -2.10671  
N -0.88937 -0.12402 -1.93958  
H 3.35500 1.60156 -1.55157  
C 2.23216 -0.85817 -1.80071  
C -2.27039 -0.70241 -1.69030  
H -2.14984 -1.76392 -1.46379  
C 2.27859 1.57301 -1.34829  
H 2.13684 -1.82658 -1.30156  
H -3.08095 1.08131 -0.78536  
N 1.92655 0.22168 -0.77904  
H 2.01172 2.34254 -0.62751  
C -2.92774 0.02791 -0.54756  
H -3.90785 -0.40535 -0.32022  
H 3.80322 -0.31016 0.11790  
O -0.09680 1.69445 0.14777  
C 2.80795 0.01647 0.43900  
H -2.14306 -2.16646 0.69599  
N -2.04632 -0.04193 0.68516  
H 2.08852 -1.97207 0.87537  
H 9.22243 0.98258 0.93191  
H -2.23163 2.04621 1.04763  
C 2.18122 -0.99823 1.36109  
C -2.29663 -1.35346 1.41096  
H 0.17525 -2.55559 1.57060  
H -3.35294 -1.36344 1.70725  
C -2.44530 1.11508 1.56747  
H -3.51673 1.04111 1.78492  
N 0.78675 -0.53941 1.74936  
H 2.78518 -1.13406 2.26523  
C 0.06517 -1.75720 2.31124  
H 1.39020 1.41812 2.36445  
C -1.41176 -1.56785 2.63595  
H -1.89684 1.10187 2.50287  
H -1.74742 -2.49875 3.10893  
C 0.89132 0.54832 2.78628  
H 0.61107 -2.06330 3.21250  
H -0.09605 0.85040 3.11957  
H -1.56707 -0.79078 3.38959  
H 1.45812 0.17305 3.64515

52

FeO syn (2/5)

Fe -0.06126 0.24043 -0.02970  
H 1.73722 -1.62793 -3.66587  
H -0.64758 -1.36856 -3.75437  
H -1.57321 0.88780 -3.75068  
H 1.42109 0.08040 -3.58454  
C 1.31811 -0.84891 -3.01714  
H -0.08285 1.51550 -3.01660  
C -0.14842 -1.21456 -2.78802  
H -1.06121 1.09473 -2.80338  
H -2.94150 -0.66001 -2.58482  
H 1.75408 1.80172 -2.28865  
H -0.21116 -2.15233 -2.22690  
H 3.24086 -0.77666 -2.03813  
H -1.62727 1.83091 -2.23586  
N -0.92910 -0.18085 -2.01439  
H 3.38169 1.62339 -1.60105  
C 2.18235 -0.84167 -1.75688  
H 1.80045 -1.18370 -3.94516  
H -0.59029 -0.91678 -3.95982  
H -1.83539 1.21796 -3.21584  
H 1.43951 0.46196 -3.52523  
C 1.37918 -0.56254 -3.14470  
H -1.6084 1.60335 -2.78152  
C -0.07822 -1.01586 -2.99421  
H -1.09304 1.18782 -2.41161  
H -2.82191 -0.84811 -2.67841  
H 1.67514 1.88685 -1.93609  
H -0.11776 -2.06271 -2.68805  
H 3.33396 -0.55201 -2.23951  
H -1.43869 1.80047 -1.57951  
N -0.89291 -0.23968 -1.97612  
H 3.31451 1.74341 -1.27651  
C 2.29913 -0.75387 -1.93121  
C -2.23288 -0.91788 -1.75646  
H -2.03100 -1.96925 -1.55054  
C 2.25031 1.58402 -1.06551  
H 2.24437 -1.78662 -1.57977

H 0.19377 -2.59129 1.53871  
H -3.31601 -1.34049 1.67919  
C -2.47916 1.16719 1.58331  
H -3.54633 1.06579 1.80929  
N 0.83466 -0.60125 1.81889  
H 2.87150 -1.13114 2.23992  
C 0.09532 -1.82149 2.31046  
H 1.46415 1.31661 2.53084  
C -1.38458 -1.57942 2.61067  
H -1.91699 1.14932 2.51226  
H -1.76930 -2.50610 3.05410  
C 0.93012 0.44227 2.89850  
H 0.60055 -2.18772 3.21482  
H -0.06004 0.75987 3.21304  
H -1.52199 -0.81562 3.38148  
H 1.46076 0.02608 3.76329

52

FeO anti (2/3)

Fe -0.04663 -0.33300 -0.09426  
H 1.80965 -1.17477 -3.95299  
H -0.58740 -0.84754 -3.98682  
H -1.89098 1.20913 -3.26033  
H 1.48656 0.47657 -3.51503  
C 1.38538 -0.55230 -3.15527  
H -0.21593 1.64554 -2.89449  
C -0.07845 -0.96415 -3.02155  
C -1.12649 1.22404 -2.47677  
H -2.79914 -0.81366 -2.71024  
H 1.46129 1.82726 -1.86145  
H -0.13779 -2.01316 -2.72706  
H 3.29564 -0.58009 -2.16068  
H -1.46145 1.86292 -1.65981  
N -0.87645 -0.18428 -1.99316  
H 3.13223 1.70855 -1.27562  
C 2.24765 -0.79312 -1.91673  
C -2.19891 -0.89840 -1.79699  
H -1.97785 -1.95090 -1.62165  
C 2.08194 1.52669 -1.02445  
H 2.17301 -1.83462 -1.59632  
H -3.28401 0.71672 -0.86277  
N 1.89148 0.05965 -0.70974  
H 1.81248 2.12675 -0.15433  
C -2.92796 -0.28602 -0.62250  
H -3.80325 -0.88555 -0.35741  
H 3.72511 -0.78156 0.04292  
O -0.01506 -1.94534 -0.28646  
C 2.83180 -0.29390 0.44241  
H -2.19955 -2.23832 1.00463  
N -2.00245 -0.17858 0.58940  
H 1.95019 -2.18134 1.01290  
H 3.15475 0.63618 0.91183  
H -1.98551 1.96223 0.55041  
C 2.13483 -1.19463 1.43690  
C -2.31538 -1.30504 1.55984  
H 0.12243 -2.57966 2.06513  
H -3.36940 -1.19825 1.84489  
C -2.26379 1.16274 1.23860  
H -3.32961 1.24543 1.47525  
N 0.78701 -0.59984 1.79468  
H 2.73875 -1.30941 2.34468  
C 0.02382 -1.63449 2.60123  
H 1.36505 1.46569 1.99302  
C -1.45460 -1.32423 2.82265  
H -1.69104 1.27457 2.15259  
H -1.84826 -2.13157 3.45287  
C 0.98624 0.65271 2.61072  
H 0.53180 -1.73229 3.56887  
H 0.04568 0.96669 3.05418  
H -1.59326 -0.41291 3.41278  
H 1.69947 0.45173 3.41703

52

FeO anti (2/5)

Fe -0.04427 -0.41110 -0.10067  
H 1.80045 -1.18370 -3.94516  
H -0.59029 -0.91678 -3.95982  
H -1.83539 1.21796 -3.21584  
H 1.43951 0.46196 -3.52523  
C 1.37918 -0.56254 -3.14470  
H -1.6084 1.60335 -2.78152  
C -0.07822 -1.01586 -2.99421  
H -1.09304 1.18782 -2.41161  
H -2.82191 -0.84811 -2.67841  
H 1.67514 1.88685 -1.93609  
H -0.11776 -2.06271 -2.68805  
H 3.33396 -0.55201 -2.23951  
H -1.43869 1.80047 -1.57951  
N -0.89291 -0.23968 -1.97612  
H 3.31451 1.74341 -1.27651  
C 2.29913 -0.75387 -1.93121  
C -2.23288 -0.91788 -1.75646  
H -2.03100 -1.96925 -1.55054  
C 2.25031 1.58402 -1.06551  
H 2.24437 -1.78662 -1.57977

H -3.31364 0.74712 -0.89671  
N 2.00091 0.13778 -0.73792  
H 1.95249 2.20606 -0.22064  
C -2.98092 -0.25108 -0.60830  
H -3.87846 -0.83051 -0.36724  
H 3.79743 -0.73423 0.06549  
O -0.01192 -2.06507 -0.30214  
C 2.88372 -0.25835 0.43690  
H -2.27270 -2.18690 0.99427  
N -2.11436 -0.10933 0.63474  
H 2.00851 -2.18376 0.95365  
H 3.18654 0.65598 0.94888  
H -2.15791 2.02347 0.62397  
C 2.17006 -1.20145 1.39855  
C -2.36815 -1.27068 1.58102  
H 0.10252 -2.61835 2.00771  
H -3.40825 -1.19126 1.92540  
C -2.42913 1.20583 1.29295  
H -3.50006 1.26359 1.52168  
N 0.80463 -0.64831 1.76602  
H 2.76206 -1.32439 2.31314  
C 0.02439 -1.68010 2.56020  
H 1.33255 1.43332 1.90065  
C -1.44910 -1.33489 2.80851  
H -1.87033 1.31743 2.21789  
H -1.83957 -2.14620 3.33601  
C 0.94794 0.63791 2.53666  
H 0.53683 -1.80150 3.52271  
H -0.01319 0.94682 2.93535  
H -1.54893 -0.43437 3.42219  
H 1.64029 0.47857 3.37039

58

FeO+CNCH3 syn (2/3)

Fe -0.05445 -0.14195 -0.07022  
H 1.77202 -1.21491 -3.96101  
H -0.59574 -0.75834 -3.99935  
H -1.72309 1.16969 -3.43607  
H 1.52007 0.44744 -3.51535  
C 1.37985 -0.57702 -3.15876  
H -0.19015 1.74604 -2.72283  
C -0.10297 -0.92345 -3.03257  
C -1.13667 1.25525 -2.51232  
H -2.82825 -0.72649 -2.70423  
H 1.64971 1.81440 -1.95758  
H -0.21166 -1.98002 -2.79200  
H 3.29812 -0.71253 -2.19003  
H -1.66791 1.84646 -1.77191  
N -0.89135 -0.13950 -1.99346  
H 3.33269 1.52857 -1.45720  
C 2.24214 -0.85102 -1.92392  
C -2.21943 -0.84500 -1.79952  
H -2.01966 -1.90718 -1.67398  
C 2.28370 1.48187 -1.14301  
H 2.12262 -1.88074 -1.58574  
H -3.33251 0.71875 -0.82193  
N 1.95219 0.06122 -0.74802  
C 2.11987 2.13957 -0.29328  
H -2.96016 -0.28278 -0.60431  
H -3.83038 -0.90719 -0.37639  
H 3.74986 -0.80498 0.05935  
O -0.08646 1.47942 0.12726  
C 2.85625 -0.29066 0.42741  
H -2.16192 -2.27282 0.98917  
N -2.06746 -0.18344 0.62752  
H 1.98129 -2.15930 1.06459  
H 3.18774 0.64415 0.88050  
H -2.31701 1.93545 0.67091  
C 2.14397 -1.15361 1.44702  
C -2.31620 -1.35511 1.55727  
H 0.18320 -2.56332 2.13848  
H -3.37433 -1.32061 1.84764  
C -2.45541 1.09127 1.34127  
H -3.50600 1.02206 1.64596  
N 0.79208 -0.56301 1.79975  
H 2.75078 -1.23808 2.35702  
C 0.03879 -1.59818 2.62180  
H 1.47977 1.45187 2.04901  
C -1.45484 -1.34452 2.82267  
H -1.83771 1.24891 2.21854  
H -1.81774 -2.16568 3.45394  
C 0.98835 0.67848 2.63233  
H 0.53111 -1.64846 3.60142  
H 0.02478 1.06601 2.95731  
H -1.62886 -0.43729 3.40857  
H 1.59223 0.43046 3.51228  
N -0.01932 -2.26510 -0.32822  
C -0.00513 -3.42342 -0.46859  
C 0.01226 -4.86294 -0.64083  
H 0.91996 -5.16698 -1.17090  
H -0.01048 -5.35832 0.33480  
H -0.85942 -5.18269 -1.21989

58

FeO+CNCH3 syn (2/5)

Fe -0.05579 -0.10812 -0.06827  
H 1.78015 -1.14194 -3.98817  
H -0.57268 -0.79584 -4.07116  
H -1.78687 1.17946 -3.53596  
H 1.48107 0.49606 -3.49249  
C 1.36667 -0.54220 -3.16700  
C -0.26475 1.74082 -2.80450  
C -0.11606 -0.92958 -3.08080  
C -1.20849 1.23667 -2.60568  
H -2.90354 -0.77436 -2.70962  
H 1.73134 1.84631 -1.92894  
H -0.20641 -1.98564 -2.82736  
H 3.30713 -0.70977 -2.24689  
H -1.75488 1.82168 -1.86926  
N -0.95074 -0.14842 -2.08469  
H 3.41711 1.54588 -1.44097  
C 2.25708 -0.83132 -3.14684  
C -2.25311 -0.86623 -1.82957  
H -2.03193 -1.92358 -1.69697  
C 2.36897 1.49515 -1.12267  
H 2.13249 -1.86170 -1.61187  
H -3.39585 0.68119 -0.84577  
N 2.02632 0.07559 -0.75306  
H 2.21179 2.14036 -0.26091  
C -2.99875 -0.30857 -0.61641  
H -3.85595 -0.95555 -0.39869  
H 3.77193 -0.87039 0.06506  
O -0.08668 1.51481 0.12713  
C 2.89438 -0.32490 0.42923  
H -2.17241 -2.25884 1.00801  
N -2.14267 -0.17034 0.63314  
H 1.99359 -2.18494 1.09123  
H 3.25835 0.59497 0.88890  
H -2.40473 1.94396 0.64385  
C 2.17612 -1.18175 1.47219  
C -2.33441 -1.34249 1.57664  
H 0.17416 -2.57910 2.16773  
H -3.38685 -1.33510 1.89260  
C -2.53557 1.10761 1.32726  
H -3.58396 1.04415 1.64267  
N 0.84814 -0.59222 1.88436  
H 2.82576 -1.27711 2.35237  
C 0.04713 -1.61713 2.66355  
H 1.58383 1.39887 2.14949  
C -1.44888 -1.31647 2.83337  
H -1.90888 1.28082 2.19759  
H -1.83446 -2.21087 2.48806  
C 1.05567 0.63817 2.71994  
H 0.50307 -1.70510 3.65939  
H 0.09342 1.04833 3.01880  
H -1.59991 -0.39000 3.39548  
H 1.63200 0.38201 3.61742  
N -0.01750 -2.22245 -0.32376  
C -0.00050 -3.38095 -0.46012  
C 0.02041 -4.82028 -0.62690  
H 0.92890 -5.12339 -1.15630  
H -0.00036 -5.31162 0.35096  
H -0.85083 -5.14414 -1.20443

58  
FeO+CNCH3 anti (2/3)  
Fe -0.00228 -0.37066 0.01591  
H -2.07113 0.08401 3.85242  
H -3.47118 0.18380 1.89888  
H -3.86585 -1.53731 0.36307  
H -2.01777 -1.47866 3.08823  
H -1.69863 -0.43949 2.96270  
C -2.45001 -2.39079 1.00519  
C -2.38193 0.22149 1.76803  
H -2.78692 -1.68918 0.24628  
H -3.68031 0.59910 -0.64316  
H -0.80892 -2.84182 2.00724  
H -2.07999 1.26798 1.72181  
H 0.19762 -0.66386 3.96607  
H -2.59079 -2.11637 -0.73434  
N -2.07657 -0.37436 0.40242  
H 0.45421 -2.82057 3.25295  
C -0.17373 -0.31841 2.99253  
C -2.58366 0.61504 -0.63007  
H -2.25833 1.60586 -0.31385  
C 0.23188 -2.60503 2.20168  
H 0.12981 0.71998 2.85454  
H -2.43851 -0.67279 -2.35120  
N 0.52666 -1.14747 1.92971  
H 0.86025 -3.23187 1.57598  
C -2.03936 0.27910 -1.99830  
H -2.33863 1.04347 -2.72396  
H 2.30174 -0.80882 3.09328  
O -0.05797 1.18132 0.55285  
C 2.03444 -0.97626 2.04414  
H -0.25446 2.22444 -1.55172  
N -0.52167 0.16535 -1.98373  
H 2.13492 1.11759 1.54414  
H 2.49905 -1.91532 1.74066  
H -0.71868 -1.71110 -2.99449

C 2.52709 0.16563 1.18767  
C 0.10696 1.51263 -2.29456  
H 1.93812 2.09621 -0.27693  
H -0.26161 1.81966 -3.28200  
C -0.14583 -0.79360 -3.08972  
H -0.38050 -0.32985 -4.05460  
N 2.05977 -0.00651 -0.24531  
H 3.62260 0.21284 1.21120  
C 2.30255 1.31889 -0.94881  
H 2.70151 -2.04413 -0.40539  
C 1.63721 1.49089 -2.31243  
H 0.91212 -1.03194 -3.06193  
H 1.95915 2.47162 -2.68512  
C 2.85073 -1.09502 -0.91489  
H 3.38946 1.43423 -1.05171  
H 2.53922 -1.20463 -1.95078  
H 2.01758 0.76942 -3.04227  
H 3.91589 -0.83862 -0.89277  
N 0.06653 -2.32863 -0.66256  
C 0.10730 -3.43256 -1.03433  
C 0.59122 -4.80691 -1.49318  
H 0.52773 -5.45657 -0.69338  
H -0.83956 -5.14273 -1.78851  
H 0.82931 -4.89142 -2.35392

58  
FeO+CNCH3 anti (2/5)  
Fe -0.13238 -0.29239 0.03312  
H -1.64618 -0.25257 4.15429  
H -3.31429 -0.27240 2.46845  
H -3.69016 -2.07785 0.98777  
H -1.45081 -1.75010 3.29418  
C -1.31898 -0.66827 3.19245  
H -2.04849 -2.67841 1.30941  
C -2.28011 -0.08627 2.14896  
C -2.64428 -2.03861 0.66128  
H -4.00527 0.10081 -0.05239  
H -0.07220 -2.90743 2.19918  
H -2.13446 0.99293 2.08669  
H 0.68660 -0.56625 3.98724  
H -2.57587 -2.41554 -0.35682  
N -2.14752 -0.62505 0.73344  
H 1.38981 -2.66173 3.17672  
C 0.16791 -0.30146 3.05488  
C -2.93212 0.27518 -2.20098  
H -2.71137 1.30362 0.08571  
C 0.92869 -2.48220 2.19711  
H 0.27604 0.77333 2.89851  
H -2.91140 -0.96213 -1.97292  
N 0.88525 -1.00553 1.92137  
H 1.51967 -2.98338 1.43379  
H 2.58597 0.03349 -1.66633  
H -3.13527 0.75424 -2.28485  
H 2.70860 -0.23809 2.75644  
O -0.35815 1.23545 0.60906  
C 2.30830 -0.50794 1.77120  
H -1.06339 2.20652 -1.51029  
N -1.10445 0.13603 1.96230  
H 1.92867 1.56155 1.25568  
H 2.90844 -1.34121 1.40157  
H -1.17407 -1.76598 -2.92857  
C 2.43642 0.69153 0.83926  
C -0.70251 1.55526 -2.30814  
H 1.27899 2.46609 -0.53155  
H 1.22482 1.82836 -3.23618  
C -0.78767 -0.76760 -3.12079  
H -1.25659 -0.37751 -4.03305  
N 1.82667 0.42964 -0.52375  
H 3.49820 0.94030 0.71671  
C 1.68558 1.75574 -1.25255  
H 2.78147 -1.46537 -0.78334  
C 0.80846 1.75443 -2.51069  
H 0.28590 -0.83376 -3.27919  
H 0.92717 2.75324 -2.95024  
C 2.67513 -0.52155 -1.31417  
H 2.69869 2.08481 -1.52013  
H 2.21837 -0.71665 -2.28261  
H 1.19858 1.06573 -3.26675  
H 3.66843 -0.08461 -1.47169  
N 0.14458 -2.21064 -0.67853  
C 0.30094 -3.29450 -1.07824  
C 0.49737 -4.64313 -1.57107  
H 1.55052 -4.80038 -1.82302  
H 0.20456 -5.36844 -0.80584  
H -0.10882 -4.80929 -2.46672

66  
FeO+CHD syn React (2/3)  
Fe -0.18684 -0.21182 -0.01303  
H 2.20510 -1.25958 -3.57862  
H -0.18393 -1.17356 -3.86590  
H -1.39988 0.89470 -3.65205  
H 1.71982 0.39199 -3.32113  
C 1.65835 -0.60901 -2.88504  
H -0.06636 1.59430 -2.71201

C 0.22507 -1.12655 -2.84874  
C -0.99452 1.03649 -2.64449  
H -2.56274 -0.98495 -2.96356  
H 1.58746 1.89026 -1.83978  
H 0.21755 -2.14213 -2.44080  
H 3.44248 -0.43378 -1.67704  
H -1.69391 1.61017 -2.04059  
N -0.75600 -0.31233 -2.01566  
H 3.13112 1.85330 -0.96913  
H 2.38360 -0.68839 -1.54399  
C -2.06261 -1.08647 -1.99401  
H -1.82170 -2.14263 -1.85483  
C 2.05309 1.67503 -0.88433  
H 2.33359 -1.71027 -1.15683  
H -3.19570 0.47594 -1.02821  
N 1.82706 0.23925 -0.47886  
H 1.62283 2.32794 -0.12851  
C -2.93497 -0.57216 -0.87780  
H -3.66999 -1.14030 -2.08200  
H 3.64887 -0.11749 0.59908  
O -0.46375 1.34611 0.32593  
C 2.58599 0.03211 0.81751  
H -1.98584 -2.77806 0.21731  
N -2.19805 -0.67561 0.44404  
H 2.12703 -2.07009 0.98261  
H 2.49522 0.94791 1.40259  
H -2.71640 1.31324 1.00763  
C 2.01653 -1.14916 1.55931  
C -2.33760 -2.08569 0.98713  
H 0.24679 -2.97397 1.34658  
H -3.40807 -2.27188 1.13937  
H -2.85814 0.30255 1.38371  
H -3.92713 0.06856 1.44163  
N 0.53429 -0.92946 1.80278  
H 2.52467 -1.29558 2.51880  
C -0.06151 -2.28901 2.14291  
H 0.78693 1.00023 2.68792  
H -1.57806 -2.33360 2.28875  
C -2.43349 0.23640 2.37964  
H -1.82818 -3.35197 2.61052  
C 0.35877 0.03441 2.94704  
H 0.41632 -2.62311 3.07253  
H -0.69436 0.17705 3.16459  
H -1.92962 -1.68300 3.09450  
H 0.85686 -0.36905 3.83539  
H -0.78099 3.84549 0.66655  
H -1.22541 4.64867 1.27802  
C -2.72774 4.49107 1.30626  
C -3.43869 4.34778 2.43510  
C -2.82188 4.33363 3.81445  
C -1.31955 4.49419 3.78661  
C -0.60965 4.63736 2.65754  
H -0.95546 5.58137 0.75394  
H -3.23615 4.50184 0.34358  
H -4.52081 4.24107 2.38920  
H -3.27154 5.12921 4.43290  
H -3.09552 3.39960 4.33638  
H -0.81309 4.49633 4.75016  
H 0.47131 4.75660 2.70851

FeO+CHD syn TS (2/3)  
Fe -0.25872 -0.06932 0.04272  
H 2.18721 -1.12047 -3.51324  
H -0.19804 -1.10034 -3.83115  
H -1.44302 0.95646 -3.63741  
H 1.65348 0.51863 -3.26848  
C 1.61464 -0.48219 -2.82901  
H -0.14948 1.68273 -2.66033  
C 0.19373 -1.03636 -2.80730  
C -1.06478 1.10166 -2.61897  
H -2.61954 -0.90741 -2.93630  
H 1.50252 2.03228 -1.79947  
H 0.20791 -2.04873 -2.39162  
H 3.38559 -0.26898 -1.60898  
H -1.79122 1.65491 -2.02793  
N -0.80956 -0.24232 -1.98926  
H 3.04475 2.01653 -0.92447  
C 2.32850 -0.53542 -1.47965  
C -2.10499 -1.02998 -1.97607  
H -1.85316 -2.08699 -1.87102  
C 1.96788 1.82717 -0.84118  
H 2.28972 -1.55495 -1.08627  
H -3.24019 0.49373 -0.95431  
N 1.75464 0.39343 -0.42665  
H 1.52608 2.47648 -0.09039  
H -2.97452 -0.55774 -0.83717  
H -3.90665 -1.13335 -0.79350  
H 3.58101 0.12718 0.66745  
H -0.61042 1.53747 0.42856  
C 2.50764 0.20735 0.87523  
H -1.87724 -2.76005 0.14625  
N -2.23544 -0.68990 0.47942  
H 2.17672 -1.92169 1.01062  
H 2.35314 1.10740 1.47206  
H -2.88261 1.22448 1.13510

C 2.00720 -1.01764 1.59875  
C -2.28341 -2.13386 0.94516  
H 0.33572 -2.92549 1.30289  
H -3.34123 -2.39918 1.07082  
C -2.95607 0.19179 1.46619  
H -4.00644 -0.11896 1.51673  
N 0.51760 -0.89384 1.84378  
H 2.52829 -1.14422 2.55506  
C -0.01117 -2.28877 2.12276  
H 0.66448 1.00947 2.80318  
C -1.52654 -2.40854 2.24337  
H -2.52083 0.11015 2.45668  
H -1.73530 -3.45117 2.51330  
C 0.28696 0.01297 3.02213  
H 0.46612 -2.64367 3.04601  
H -0.77347 0.09547 3.23705  
H -1.61655 -1.81304 3.07354  
H 0.79927 -0.39688 3.90066  
H -0.88250 2.94093 0.86564  
C -1.06620 4.05956 2.12065  
C -2.53024 4.31362 1.15179  
C -3.28346 4.48612 2.25839  
C -2.70639 4.48410 3.64843  
C -1.20537 4.38016 3.67517  
C -0.46265 4.20868 2.56161  
H -0.50738 4.59546 4.03101  
H -2.99243 4.34346 0.16815  
H -4.35318 4.65914 2.16977  
H -3.02732 5.39220 4.18682  
H -3.15017 3.66107 2.32755  
H -0.72284 4.47290 4.64509  
H 0.62121 4.15909 2.63224

FeO+CHD Intermediate (2/3)  
Fe -0.26321 0.07771 -0.10246  
H 2.32177 -1.61573 -3.33668  
H -0.04418 -1.61922 -3.76173  
H -1.15618 0.53141 -3.96355  
H 1.81046 0.04753 -3.38426  
C 1.73291 -0.86811 -2.79118  
H 0.07512 1.35268 -2.97901  
C 0.30100 -1.39070 -2.74430  
C -0.85925 0.80295 -2.94395  
H -2.50043 -1.15616 -3.06876  
H 1.77457 1.77667 -2.16974  
H 0.26763 -2.31751 -2.16290  
H 3.45557 -0.48957 -1.54488  
H -1.61235 1.44879 -2.49786  
N -0.70736 -0.44984 -2.12066  
H 3.17130 1.91410 -1.08965  
C 2.38866 -0.71580 -1.42068  
C -2.04007 -1.16781 -2.07385  
H -1.84975 -2.21041 -1.81308  
C 2.09154 1.73032 -1.13200  
H 2.31078 -1.66088 -0.87834  
H -3.15233 0.53340 -1.34223  
N 1.80368 0.37366 -0.54081  
H 1.54609 2.47692 -0.56086  
C -2.93839 -0.49907 -1.06255  
H -3.89629 -1.02587 -0.98072  
H 3.55988 0.22039 0.67751  
O -0.56291 1.86245 0.05896  
C 2.47787 0.33038 0.81663  
H -1.96898 -2.57059 0.23629  
N -2.26815 -0.46816 0.29835  
H 2.10517 -1.77039 1.17584  
H 2.30416 1.29583 1.29475  
H -2.93486 1.51915 0.65671  
C 1.92601 -0.80329 1.64907  
C -2.37956 -1.84114 0.93864  
H 0.18623 -2.70184 1.48501  
H -3.45072 -2.05273 1.05067  
C -3.01264 0.54421 1.12980  
H -4.06472 0.24363 1.19547  
N 0.43220 -0.63364 1.81206  
H 2.40665 -0.82609 2.63466  
C -4.05820 -1.96483 2.21716  
H 0.61057 1.35927 2.57272  
C -1.68272 -1.99489 2.28934  
H -2.60385 0.60033 2.13335  
H -1.95915 -2.98610 2.66890  
C 0.17630 0.40679 2.86963  
H 0.26568 -2.23794 3.19315  
H -0.88926 0.55095 3.01700  
H -2.06868 -1.28599 3.02774  
H 0.62315 0.08049 3.81619  
H -0.85554 5.53229 0.71094  
C -1.39500 4.59434 1.57379  
C -2.80170 4.42065 1.73766  
C -3.33985 4.04974 2.94410  
C -2.48570 3.81143 4.16183  
C -1.01517 0.02787 3.91755  
C -0.52757 4.39962 2.68915  
H -0.99533 4.93952 0.62488  
H -3.45533 4.95442 0.88712

H -4.41369 3.92664 3.05319  
H -2.82843 4.45625 4.99454  
H -2.65927 2.78973 4.52555  
H -0.34112 3.89021 4.75827  
H 0.53951 4.55924 2.55947

66

FeO+CHD syn React (2/5)

Fe -0.20130 -0.09995 -0.03575  
H 2.48971 -1.53697 -3.30485  
H 0.15875 -1.50972 -3.88351  
H -1.00380 0.62327 -3.97924  
H 1.97646 0.12280 -3.22555  
C 1.86271 -0.84510 -2.72884  
H 0.22526 1.36310 -2.93249  
C 0.43054 -1.37017 -2.82825  
C -0.71963 0.82730 -2.93998  
H -2.40240 -1.11241 -3.16789  
H 1.82141 1.78032 -1.81278  
H 0.36032 -2.34341 -2.33259  
H 3.52505 -0.64396 -1.36675  
H -1.47119 1.46245 -2.47503  
N -0.60109 -0.47206 -2.18945  
H 3.30020 1.72858 -0.83021  
C 2.44489 -0.83081 -1.31597  
C -1.94041 -1.16543 -2.17432  
H -1.77090 -2.22009 -1.94907  
C 2.21185 1.60435 -0.81511  
H 2.29981 -1.81191 -0.85721  
H -3.03625 0.53175 -1.38679  
N 1.88111 0.21082 -0.35487  
H 1.76339 2.31973 -0.12768  
C -2.85467 -0.51746 -1.14988  
H -3.82585 -1.02503 -1.12999  
H 3.58702 -0.14246 0.88624  
O -0.46413 1.51061 0.22617  
C 2.50916 0.00764 1.01474  
H -1.99414 -2.66767 0.08228  
N -2.25592 -0.56326 0.24774  
H 2.04679 -2.10573 1.19304  
H 2.36853 0.93403 1.57321  
H -2.81241 1.43814 0.69415  
C 1.89446 -1.17437 1.74183  
C -2.41692 -1.97208 0.81104  
H 0.08249 -2.99553 1.42895  
H -3.49715 -2.15810 0.86048  
H -2.98570 0.44166 1.09721  
H -4.05640 0.21083 1.08449  
N 0.40956 -0.96782 1.90612  
H 2.36779 -1.29290 2.72443  
C -0.26275 -2.28950 2.19035  
H 0.65243 0.95901 2.80554  
C -1.79050 -2.23084 2.18104  
H -2.62967 0.40747 2.12261  
H -2.14248 -3.22260 2.49111  
C 0.15846 0.01309 3.02013  
H 0.08806 -2.64957 3.16709  
H -0.90518 0.20601 3.12763  
H -2.17450 -1.54210 2.93908  
H 0.54295 -0.39701 3.96163  
H -3.93641 20.71863 2.93902  
C -4.28160 21.59448 3.51467  
C -5.39294 21.18662 4.45342  
C -5.34740 21.37046 5.78080  
C -4.17925 22.00720 6.49675  
C -3.06763 22.41446 5.55808  
C -3.11319 22.23070 4.23069  
H -4.67304 22.28556 2.74857  
H -6.26602 20.72080 3.99988  
H -6.18360 21.05330 6.40141  
H -4.52452 22.88361 7.07149  
H -3.78807 21.31673 7.26354  
H -2.19448 22.88013 6.01165  
H -2.27695 22.54777 3.61010

66

FeO+CHD syn Intermediate (2/5)

Fe -0.65421 0.76984 0.26133  
H 1.90622 -0.73350 -3.16702  
H -0.42842 -1.01825 -3.40927  
H -1.72901 1.02361 -3.64079  
H 1.24790 0.87666 -3.10544  
C 1.30269 -0.06127 -2.54425  
H -0.60440 2.00209 -2.66625  
C -0.07201 -0.71825 -2.41374  
C -1.46471 1.33865 -2.62379  
H -2.91315 -0.77950 -2.60786  
H 1.19500 2.61118 -1.83315  
H 0.10307 -1.62381 -1.80449  
H 3.10834 0.38872 -1.44006  
H -2.29492 1.89075 -2.18540  
N -1.15696 0.13187 -1.78147  
H 2.75924 2.72635 -0.99970  
C 2.06562 0.11138 -1.22883  
C -2.39968 -0.72056 -1.64012

H -2.07946 -1.73156 -1.38061  
C 1.68832 2.52598 -0.86755  
H 2.08148 -0.84430 -0.69886  
H -3.65930 0.85087 -0.84933  
N 1.49234 1.15116 -0.29391  
H 1.25803 3.26217 -0.19131  
C -3.33993 -0.16030 -0.58729  
H -4.24278 -0.78215 -0.52410  
H 3.28194 1.01233 0.88391  
O -1.15251 2.47317 0.45019  
C 2.19798 1.09132 1.04060  
H -2.22761 -2.15254 0.66555  
N -2.67740 -0.08392 0.76740  
H 1.91546 -1.02770 1.37671  
H 2.01281 2.03926 1.55098  
H -3.42565 1.85763 1.19342  
C 1.71107 -0.07951 1.87749  
C -2.62564 -1.45222 1.40423  
H 0.04791 -2.05009 1.65419  
H -3.65735 -1.75970 1.62726  
C -3.47933 0.85860 1.62213  
H -4.52232 0.51971 1.66851  
N 0.22033 -0.00174 2.12167  
H 2.23841 -0.09754 2.83936  
C -0.27200 -1.39141 2.46806  
H 0.38590 1.93465 3.00646  
C -1.78007 -1.53552 2.67756  
H -3.08083 0.88956 2.63416  
H -1.93809 -2.54031 3.08926  
C -0.06042 0.96791 3.23635  
H 0.25405 -1.70823 3.37959  
H -1.13167 1.11116 3.35518  
H -2.14433 -0.85018 3.44916  
H 0.36045 0.58683 4.17502  
H -1.07885 3.39634 0.77723  
C -0.85848 5.41911 1.43279  
C -2.17969 5.61170 0.92861  
C -3.27672 5.45330 1.73759  
C -3.14857 5.08840 3.18895  
C -1.72971 4.92812 3.65536  
C -0.66346 5.09337 2.80869  
H -0.00195 5.60482 0.79319  
H -2.31008 5.88725 -0.11350  
H -4.27732 5.60300 1.34333  
H -3.66637 5.84255 3.12970  
H -3.72142 4.16397 3.39761  
H -1.56976 4.68385 4.70126  
H 0.34924 4.98041 3.18395

66

FeO+CHD anti React (2/3)

Fe -0.13859 -0.21428 0.09552  
H -2.32051 -0.28721 3.86818  
H -3.67317 -0.09177 1.87223  
H -3.81566 -1.72203 -0.06072  
H -2.17249 -1.76460 2.96564  
C -1.90082 -0.70428 2.94402  
H -2.57362 -2.45890 0.96063  
C -2.58555 0.03043 1.79327  
C -2.73723 -1.79821 1.01429  
H -3.82703 0.50624 -0.60898  
H -0.81777 -2.86828 1.74501  
H -2.35471 1.09561 1.84743  
H -0.02152 -0.99454 3.95514  
H -2.26401 -2.23461 -0.76412  
N -2.17976 -0.42639 4.04038  
H 0.65074 -3.05564 2.71807  
C -0.38682 -0.51532 3.03826  
C -2.73290 0.57271 -0.59300  
H -2.45022 1.56711 -0.24764  
C 0.23067 -2.60094 1.81463  
H -0.14006 0.54791 3.08266  
H -2.56598 -0.65019 -2.36432  
N 0.40792 -1.10058 1.88839  
H 0.75298 -2.99234 0.94040  
C -2.16188 0.28014 -1.96241  
H -2.42031 1.07628 -2.66595  
H 2.06744 -0.61187 3.16452  
O -0.25658 1.31120 0.63704  
C 1.89513 -0.82290 2.10562  
H -0.40211 2.23369 -1.74751  
N -0.64118 0.14286 -1.89224  
H 1.91769 1.27412 1.58723  
H 2.44652 -1.73238 1.86341  
H -0.67305 -1.93769 -2.40350  
C 2.35648 0.33562 1.25016  
H -0.00102 1.43352 -2.37325  
H 1.76743 2.20932 -0.34202  
H -0.34067 1.59658 -3.40375  
C -0.24555 -1.01136 -2.79009  
H -0.62935 -0.82984 -3.79934  
N 1.90741 0.11514 -0.18005  
H 3.44846 0.42692 1.28299  
C 2.15961 1.39497 -0.95312  
H 2.36640 -1.98025 -0.37854

C 1.52756 1.44872 -2.34301  
H 0.83279 -1.11707 -2.83633  
H 1.83454 2.40547 -2.78376  
C 2.68999 -1.02450 -0.78919  
H 3.24702 1.51846 -1.03587  
H 2.54871 -1.04539 -1.86606  
H 1.94568 0.68554 -3.00699  
H 3.75578 -0.88404 -0.58032  
H 0.02146 3.72513 1.34704  
C -0.49147 4.47307 1.97387  
C -1.92700 4.60518 1.52321  
C -2.98051 4.40254 2.32919  
C -2.85588 4.02809 3.78781  
C -1.41986 3.88529 4.23620  
C -0.36722 4.08630 3.42883  
H 0.04998 5.41619 1.78777  
H -2.08626 4.88394 0.48290  
H -3.99091 4.51704 1.94085  
H -3.36909 4.78003 4.41152  
H -3.40544 3.09196 3.98372  
H -1.26078 3.61132 5.27757  
H 0.64343 3.97567 3.81821

66

FeO+CHD anti TS (2/3)

Fe -0.24462 -0.11386 0.14464  
H -2.54759 -0.52138 3.82025  
H -3.84642 -0.39618 1.78423  
H -3.76751 -1.95557 -0.21238  
H -2.21698 -1.94558 2.88014  
C -2.05560 -0.86277 2.90037  
H -2.51910 -2.60516 0.85931  
C -2.77375 -0.16407 1.74474  
C -2.69639 -1.94114 0.01748  
H -3.96101 0.26774 -0.69888  
H -0.73838 -2.87074 1.67172  
H -2.64765 0.91468 1.83602  
H -0.20045 -0.99179 3.98819  
H -2.14071 -2.31642 -0.84120  
N -2.27390 -0.53377 0.36277  
H 0.65768 -2.96433 2.76175  
C -0.56932 -0.53199 3.06172  
C -2.87816 0.43270 -0.63385  
H -2.69601 1.43612 -0.25641  
C 0.27588 -2.52264 1.83437  
H -0.42914 0.54808 3.13465  
H -2.54923 -0.71271 -2.43501  
N 0.32365 -1.01616 1.93300  
H 0.89516 -2.85312 0.99937  
C -2.23121 0.23102 -1.98876  
H -2.52741 1.02870 -2.67632  
H 1.88188 -0.38640 3.28089  
O -0.62376 1.47276 0.66809  
H 1.76779 -0.61499 2.21726  
H -0.61464 2.30125 -1.70240  
N -0.70775 0.20498 -1.87083  
H 1.65037 1.47748 1.70576  
H 2.40650 -1.47338 2.00285  
H -0.57642 -1.86734 -2.38069  
C 2.16454 0.57816 1.37282  
C -0.14471 1.53753 -2.32515  
H 1.52725 2.42266 -0.24289  
H -0.46184 1.69086 -3.36516  
C -0.20555 -0.91238 -2.75545  
H -0.56856 -0.76131 -3.77810  
N 1.76619 0.33829 -0.06699  
H 3.24570 0.75317 1.43647  
C 1.97508 1.62712 -0.83783  
H 2.32787 -1.72929 -0.26441  
H 1.37902 1.65036 -2.24629  
H 0.87829 -0.94360 -2.76941  
H 1.64027 2.62678 -2.67377  
C 2.62321 -0.75484 -0.65136  
H 0.50664 1.80886 -0.89305  
H 2.52793 -0.76992 -1.73327  
H 1.86437 0.91779 -2.89925  
H 3.67412 -0.57156 -0.40053  
H -0.27749 2.61626 1.32362  
C -0.19491 3.75496 1.84592  
H -1.42653 4.43587 1.39663  
C -2.47413 4.64721 2.2549  
C -2.44967 4.26264 3.67884  
C -1.11339 3.75638 4.14631  
C -0.07530 3.55018 3.30453  
H 0.72075 4.11335 3.16111  
H -1.48068 4.74443 0.35631  
H -3.37399 5.13312 1.85756  
H -2.76144 5.12045 4.29848  
H -3.22823 3.50300 3.87771  
H -0.99586 3.58273 5.21271  
H 0.88123 3.21098 3.69367

66

FeO+CHD anti React (2/5)

Fe -0.10021 -0.15712 0.50051  
H -0.59539 -1.27808 4.66361  
H -2.62155 -0.93688 3.42888  
H -3.32781 -2.31145 1.40516  
H -0.68500 -2.52032 3.45325  
C -0.52663 -1.44479 3.58116  
H -1.67203 -0.91207 1.62432  
C -1.67416 -0.63328 2.96573  
C -2.28264 -2.17875 1.10596  
H -3.83410 -0.01786 1.32692  
H 0.35165 -3.27921 1.72862  
H -1.52420 0.43096 3.15466  
H 1.60902 -1.58324 3.83213  
H -2.19013 -2.34840 0.03435  
N -1.83991 -0.78389 1.46519  
H 2.08761 -3.31058 2.09320  
C 0.90214 1.10488 3.18279  
C -2.83749 0.23419 0.94484  
H -2.55172 1.20836 1.34300  
C 1.31144 -2.83131 1.48444  
H 1.04677 0.02355 3.33107  
H -3.29847 -0.68314 -0.96115  
N 1.28797 -1.35198 1.74646  
H 1.51825 -3.01036 0.42860  
C -2.85468 0.23747 -0.57966  
H -3.47753 1.06523 -0.93554  
H 3.24150 -0.70147 2.37207

66

FeO+CHD anti Interm (2/3)

Fe -0.22446 -0.16800 0.11764

O -0.15822 1.24181 1.39584  
 C 2.66357 -0.77752 1.44477  
 H -1.38124 2.39783 -0.61220  
 N -1.45982 0.35713 -1.17408  
 H 2.20971 1.35073 1.46798  
 H 3.18624 -1.48679 0.80122  
 H -1.54417 -1.54555 -2.13623  
 C 2.58258 0.59191 0.77974  
 C -1.15443 1.80767 -1.50258  
 H 1.16609 2.57716 -0.05166  
 H -1.84685 2.11484 -2.29869  
 C -1.38761 -0.50089 -2.40811  
 H -2.15798 -0.19234 -3.12500  
 N 1.63089 0.55431 -0.40139  
 H 3.57545 0.89643 0.42794  
 C 1.39496 1.95972 -0.92227  
 H 2.14005 -1.38914 -1.16255  
 C 0.28086 2.09213 -1.96809  
 H -0.41393 -0.41001 -2.88240  
 H 0.29262 3.14472 -2.27794  
 C 2.16989 -0.34779 -1.48007  
 H 2.34208 2.30755 -1.35400  
 H 1.58052 -0.24546 -2.38643  
 H 0.51968 1.52960 -2.87609  
 C 3.20589 -0.06641 -1.69797  
 H -0.83579 3.57478 2.18921  
 C -1.46959 4.46654 2.04466  
 C -1.05287 5.19071 0.78796  
 H -1.88827 5.45515 -0.22867  
 C -3.34806 5.06552 -0.23307  
 C -3.75974 4.32074 1.01519  
 C -2.92390 4.05828 2.03223  
 H -1.26527 5.09773 2.92807  
 H -0.01327 5.50868 0.73151  
 H -1.52415 5.98627 -1.10621  
 C -3.97478 5.96578 -0.35352  
 H -3.57263 4.45741 -1.12536  
 H -4.79896 4.00189 1.07071  
 H -3.28977 3.52983 2.91097

66

FeO+CHD anti TS (2/5)  
 Fe -0.10538 -0.10577 0.26697  
 H -1.16024 -0.70446 4.43099  
 H -3.01163 -0.57576 2.90984  
 H -3.43295 -2.20105 1.00555  
 H -1.08846 -2.09141 3.38838  
 C -0.95075 -1.00561 3.39661  
 H -1.81243 -2.73179 1.49395  
 C -2.01418 -0.30522 2.53955  
 C -2.35993 -2.07805 0.82139  
 H -3.92720 0.07490 0.54658  
 H 0.15355 -3.05057 1.94006  
 H -1.90455 0.77812 2.61525  
 H -1.13205 -1.76772 3.94464  
 H -2.13529 -2.37072 -0.20353  
 N -1.97524 -0.64226 1.06237  
 H 1.81796 -3.00874 2.55194  
 C 0.51901 -0.63832 3.14036  
 C -2.88344 0.29036 0.28656  
 H -2.65118 1.30663 0.06660  
 C 1.14184 -2.62922 1.77616  
 H 0.64279 0.44653 3.15930  
 H -3.08040 -0.84961 -1.54117  
 N 1.09420 -1.12716 1.82190  
 H 1.49769 -2.95428 0.79765  
 C -2.68296 0.11292 -1.21590  
 H -3.24132 0.88742 -1.75269  
 H 2.95457 -0.38406 2.60778  
 O -0.26662 1.39827 0.95418  
 C 2.50474 -0.58996 1.63049  
 H -1.18727 2.26137 -1.31857  
 N -1.21742 0.16785 -1.62311  
 H 2.09914 1.52275 1.30079  
 H 3.09863 -1.37929 1.16731  
 H -1.17479 -1.84764 -2.31784  
 C 2.54196 0.67500 0.77749  
 C -0.85796 1.56718 -2.09531  
 H 1.27824 2.53297 -0.48003  
 H -1.44337 1.76743 -3.00335  
 H -0.98129 -0.84692 -2.70630  
 H -1.64754 -0.65221 -3.55553  
 N 1.75631 0.48425 -0.50511  
 H 3.58141 0.92177 0.52927  
 C 1.60511 1.80818 -1.22741  
 H 2.34620 -1.53546 -0.93858  
 C 0.62792 1.79845 -2.41090  
 H 0.04689 -0.80582 -3.05579  
 H 0.68892 2.80152 -2.85194  
 C 2.41644 -0.54421 -1.38414  
 H 2.60121 2.10241 -1.58301  
 H 1.93664 -0.56947 -2.35782  
 H 0.96996 1.12387 -3.20204  
 H 3.47194 -0.28170 -1.51682  
 H -0.58358 3.25875 1.74536

C -1.03794 4.22154 2.06695  
 C -1.38920 5.03447 0.84893  
 C -2.64458 5.39877 0.53828  
 C -3.84403 5.05295 1.38685  
 C -3.48110 4.29732 2.64170  
 C -2.22429 3.93563 2.94987  
 H -0.23892 4.71684 2.64372  
 H -0.56431 5.32631 0.20157  
 H -2.83453 5.98492 -0.35865  
 H -4.39173 5.97365 1.65134  
 H -4.56973 4.47047 0.79327  
 H -4.29760 4.05816 3.32014  
 H -2.02578 3.40490 3.87929

66

FeO+CHD anti Interm (2/5)  
 Fe -0.54329 -0.00236 0.18331  
 H -3.40267 -1.09701 3.26765  
 H -4.30280 -1.09902 1.05767  
 H -3.60685 -2.62555 -0.79694  
 H -2.60371 -2.37203 2.39911  
 C -2.67469 -1.28168 2.46698  
 H -2.31903 -3.01997 0.35733  
 C -3.29323 -0.68640 1.19246  
 C -2.58553 -2.37919 -0.48002  
 H -4.00087 -0.38006 -1.51917  
 H -0.69993 -2.96680 1.62245  
 H -3.38139 0.39628 1.29980  
 H -1.13888 -1.08170 3.96627  
 H -1.89817 -2.58544 -1.29916  
 N -2.50852 -0.93815 -0.07686  
 H 0.38274 -2.82229 3.02341  
 C -1.34956 -0.67897 2.96595  
 C -3.00681 -0.04719 -1.19184  
 H -3.09538 0.95975 -0.78404  
 C 0.15538 -2.43075 2.02468  
 H -1.43677 0.40690 3.04926  
 H -2.12023 -1.01380 -2.91872  
 N -0.13069 -0.95556 2.10077  
 H 1.00772 -2.60230 1.36665  
 C -2.05019 -0.06364 -2.38634  
 H -2.34243 0.72030 -3.09208  
 H 0.91221 0.03728 3.70007  
 O -1.24244 1.56707 0.65935  
 C 1.09807 -0.24201 2.65810  
 H -0.83918 2.22617 -1.82805  
 N -0.59057 0.13583 -1.98915  
 H 0.75936 1.80732 2.02691  
 H 1.92111 -0.95850 2.66247  
 H -0.07901 -1.88482 -2.43506  
 C 1.48139 1.00746 1.86201  
 C -0.13586 1.54846 -2.31686  
 H 0.89537 2.71362 0.05147  
 H -0.23016 1.67887 -3.40375  
 C 0.25229 -0.88194 -2.70623  
 H 0.16026 -0.75120 -3.79110  
 N 1.51107 0.72565 0.37702  
 H 2.46794 1.35807 2.19365  
 C 1.60428 2.01984 -0.40383  
 H 2.48817 -1.17700 0.47151  
 C 1.30576 1.89611 -1.90632  
 H 1.29723 -0.78021 -2.42661  
 H 1.50365 2.88791 -2.33315  
 C 2.64910 -0.18957 0.04090  
 H 2.61684 2.42594 -0.27141  
 H 2.73919 -0.29953 -1.03763  
 H 0.20221 1.23061 -2.39863  
 H 3.58849 0.22387 0.42879  
 H -1.62132 2.38954 1.04311  
 C -2.47992 4.09990 1.92304  
 C -1.79480 3.91887 3.16312  
 C -0.57554 4.50341 3.39535  
 C 0.09977 5.37717 2.37258  
 C -0.68479 5.53291 1.09778  
 H -1.90230 4.92747 0.91281  
 H -3.47183 3.68221 1.78340  
 H -2.25600 3.30741 3.93352  
 H -0.06844 4.35895 4.34496  
 H 0.30917 6.37328 2.80894  
 H 1.11178 4.98750 2.14987  
 H -0.25990 6.16131 0.32042  
 H -2.44403 5.07706 -0.01680

72

FeO+CNCH3+CHD syn React (2/3)  
 Fe 0.20836 -0.40767 0.00299  
 H 2.08759 -1.19762 -3.92989  
 H -0.20485 -0.45072 -3.98816  
 H -1.11618 1.54485 -3.21029  
 H 2.00901 0.41463 -3.28170  
 C 1.73407 -0.62169 -3.06521  
 H 0.43590 1.79851 -2.38162  
 C 0.21612 -0.79661 -3.03534  
 C -0.57299 1.41103 -2.26805  
 H -2.47809 -0.30735 -2.77795

H 2.23662 1.54794 -1.56230  
 H -0.02908 -1.85336 -2.94054  
 H 3.57631 -1.10023 -2.05929  
 H -1.06271 1.96896 -1.47470  
 N -0.52406 -0.05773 -1.93040  
 H 3.83960 0.99494 -1.02591  
 C 2.50002 -1.14899 -1.84866  
 C -1.93471 -0.61001 -1.87421  
 H -1.87009 -1.69630 -1.87708  
 C 2.77517 1.04201 -0.76836  
 H 2.25111 -2.19258 -1.65488  
 H -2.88387 0.95402 -0.73711  
 N 2.25693 -0.36442 -0.57403  
 H 2.63848 1.60646 0.15021  
 C -2.65868 -0.10865 -0.64314  
 H 3.61413 -0.63200 -0.53109  
 H -9.30396 -1.52503 0.18505  
 O 0.35912 1.16551 0.41679  
 C 3.05017 -0.96537 0.58078  
 H -2.18458 -2.38349 0.67357  
 N -1.82654 -0.29199 0.62052  
 H 1.94531 -2.78903 0.92968  
 H 3.45126 -0.13894 1.16814  
 H -1.83184 1.81639 0.19246  
 C 2.19654 -1.86585 1.44781  
 C -2.25935 -1.54128 1.36227  
 H 0.05249 -3.11532 1.85776  
 H -3.31997 -1.41710 1.61729  
 C -2.09788 0.90979 1.49515  
 H -3.16321 0.92651 1.75365  
 N 0.90144 -1.17424 1.82786  
 H 2.74398 -2.13517 2.35951  
 C -0.00722 -2.21422 2.46637  
 H 1.80598 0.68758 2.39060  
 C -1.47083 -1.81258 2.64599  
 H -1.50992 0.86731 2.40536  
 H -1.95929 -2.66333 3.13801  
 H 1.19069 -0.08952 2.83547  
 H 0.42334 -2.45628 3.44646  
 H 0.26141 0.36448 3.16905  
 H -1.57022 -0.98153 3.35019  
 H 1.70547 -0.52812 3.69743  
 H 0.68647 4.33414 -0.33321  
 C 0.01657 5.14025 0.00931  
 H -1.38814 4.88263 -0.48409  
 C -2.45658 4.80493 0.32447  
 C -2.38250 4.97236 1.82430  
 C -0.97257 5.19280 2.32088  
 C 0.09522 5.26849 1.51278  
 H 0.41847 6.05146 -0.46593  
 H -1.51279 4.76804 -1.55947  
 H -3.44393 4.62534 -0.09705  
 H -3.02551 5.81290 2.13730  
 H -2.82386 4.09331 2.32317  
 H -0.84730 5.29827 3.70693  
 H 1.08439 5.43580 1.93514  
 N 0.01789 -2.46848 -0.53623  
 C -0.08801 -3.59283 -0.82950  
 C -2.02064 -4.98971 -1.19435  
 H -0.61943 -5.56207 -0.35124  
 H -0.90130 -5.09254 -2.04493  
 H 0.75523 -5.40055 -1.47057

72

FeO+CNCH3+CHD syn TS (2/3)  
 Fe -0.04890 -0.21407 -0.22890  
 H 2.40716 -1.28447 -3.76287  
 H 0.05212 -0.98816 -4.19386  
 H -1.35643 0.87058 -3.86499  
 H 1.98339 0.36775 -3.41656  
 C 1.85206 -0.65623 -3.05436  
 H 0.07999 1.53401 -3.05583  
 C 0.39070 -1.09511 -3.15475  
 C -0.85959 1.00886 -2.89724  
 H -2.36420 -1.09421 -3.22715  
 H 1.68904 1.81475 -1.86838  
 H 3.31063 -2.15069 -2.89861  
 H 3.60122 -0.65176 -1.80157  
 H -1.47252 1.61016 -2.23243  
 N -0.59432 -0.33915 -2.27885  
 H 3.37940 1.57466 -1.35252  
 C 2.52466 -0.83925 -1.69009  
 C -1.88258 -1.13507 -2.24137  
 H -1.63094 -2.17532 -2.04227  
 C 2.32824 1.51262 -1.04614  
 H 2.06669 -1.86098 -1.33002  
 H -3.19529 0.39164 -1.48805  
 N 2.01640 0.10130 -0.61345  
 H 2.16019 2.18858 -0.21485  
 C -2.82567 -0.59008 -1.18898  
 H -3.69690 -1.24779 -1.09058  
 H 3.74068 -0.59353 0.47610  
 O -0.38066 1.48335 -0.14736  
 C 2.76273 -0.14820 0.68935  
 H -2.09619 -2.52353 0.50944

N -2.15250 -0.42857 0.16447  
 H 1.95713 -2.06960 1.25382  
 H 2.94939 0.81936 1.15654  
 H -2.63096 1.64699 0.18141  
 C 1.97682 -1.04560 1.62312  
 C -2.42178 -1.63126 1.04390  
 H 0.06710 -2.61393 2.02862  
 H -3.50992 -1.70670 1.17653  
 C -2.78654 0.77863 0.81253  
 H -3.85821 0.58580 0.94793  
 N 0.54336 -0.56926 1.75028  
 H 2.44762 -1.05919 2.61458  
 C -0.23797 -1.66350 2.46344  
 H 1.08357 1.46883 2.11056  
 C -1.76300 -1.55181 2.42571  
 H -2.33515 0.98244 1.77775  
 H -2.14018 -2.40658 3.00204  
 C 0.50203 0.68303 2.58256  
 H 0.09503 -1.66553 3.50979  
 H -0.52212 1.03271 2.67772  
 H -2.10520 -0.66741 2.97075  
 H 0.90918 0.47295 3.57872  
 H 0.06295 2.67189 0.24842  
 C 0.20673 3.93538 0.43448  
 C -1.17644 4.44475 0.35778  
 C -1.84416 4.88981 2.44664  
 C -1.21690 4.95699 2.81251  
 C 0.24752 4.61276 2.81755  
 C 0.89701 4.16794 1.71711  
 H 0.81374 4.14674 -0.45341  
 H -1.66389 4.43107 -0.61322  
 H -2.86916 5.23994 1.35555  
 H -1.36554 5.96137 3.24445  
 H -1.76164 4.29221 3.50822  
 H 0.78783 4.76262 3.74872  
 H 1.96473 3.96738 1.76597  
 N 0.17361 -2.35744 -0.42422  
 C 0.31002 -3.51224 -0.52468  
 C 0.47951 -4.94804 -0.64696  
 H 0.40260 -5.42060 0.33719  
 H -0.29330 -5.36479 -1.29977  
 H 1.46172 -5.17648 -1.07161

72

FeO+CNCH3+CHD syn Interm (2/3)  
 Fe -0.22589 -0.27912 -0.38707  
 H 2.65708 -1.30082 -3.57396  
 H 0.34107 -1.30411 -4.23176  
 H -1.25301 0.41950 -4.18800  
 H 2.03118 0.31258 -3.39379  
 C 1.97446 -0.69279 -2.96654  
 H -0.00354 1.29385 -3.27363  
 C 0.58416 -1.29839 -3.16105  
 H -0.89187 0.67328 -3.18428  
 H -2.12981 -1.60476 -3.49986  
 H 1.48707 1.83471 -1.99854  
 H 0.58961 -2.33579 -2.82814  
 H 3.58949 -0.42252 -1.56986  
 H -1.63984 1.23929 -2.63840  
 N -0.55826 -0.59554 -2.44451  
 H 3.13282 1.78026 -1.31679  
 C 2.53057 -0.71134 -1.53942  
 C -1.75534 -1.52162 -2.47162  
 H -1.42395 -2.51113 -2.16330  
 C 2.06628 1.64851 -1.10081  
 H 2.47759 -1.71291 -1.11298  
 H -3.30679 -0.11155 -1.99352  
 N 1.83367 0.24509 -0.58604  
 H 1.78093 2.37842 -0.34635  
 C -2.85255 -1.00588 -1.56542  
 H -3.64515 -1.75617 -1.47007  
 H 3.49010 -0.22763 0.71145  
 O -0.69293 1.45154 -0.48597  
 C 2.46930 0.15969 0.79657  
 H -2.15666 -2.67018 0.40578  
 N -2.32803 -0.63611 -0.18509  
 H 1.76591 -1.76580 1.47452  
 H 2.54766 1.17406 1.19024  
 H -2.95355 1.38260 -0.45277  
 C 1.66252 -0.71434 1.73513  
 C -2.59742 -1.75449 0.80131  
 H -0.15778 -2.41322 2.08361  
 H -3.68469 -1.90467 0.83985  
 C -3.11344 0.57718 0.25546  
 H -4.17585 0.30819 0.30506  
 N 0.18973 -0.36184 1.67207  
 H 2.02422 -0.59164 2.76388  
 C -0.57243 -1.45916 2.40530  
 H 0.58988 1.72683 1.97030  
 C -2.08911 -1.47344 2.21962  
 H -2.78546 0.91978 1.23122  
 H -2.46181 -2.28927 2.85227  
 C -0.04334 0.94415 2.38377  
 H -0.34131 -1.35023 3.47283  
 H -1.08119 1.24963 2.28485



H -2.54404 -0.56575 2.62642  
H 0.20053 0.82667 3.44571  
H -0.15604 2.11512 -0.00899  
C 0.11482 4.68627 0.60653  
C -1.14227 4.63833 1.27676  
C -1.22264 4.63364 2.64708  
C 0.00350 4.69127 3.52154  
C 1.29376 4.72791 2.74424  
C 1.31736 4.73343 1.37102  
H 0.15413 4.72926 -0.47688  
H -2.05295 4.61075 0.68462  
H -2.18959 4.60223 3.14136  
H -0.05475 5.57034 4.19379  
H 0.00817 3.83999 4.22943  
H 2.21997 4.76799 3.31054  
H 2.27063 4.78437 0.85127  
N 0.20068 -2.31305 -0.35095  
C 0.44003 -3.45476 -0.34049  
C 0.73645 -4.87417 -0.33090  
H 0.64199 -5.27123 0.68436  
H 0.04136 -5.40831 -0.98572  
H 1.75817 -5.04669 -0.68278

72  
FeO+CNCH3+CHD syn React (2/5)  
Fe 0.01524 -0.15333 0.33994  
H -0.02072 -0.36025 4.79205  
H 2.15577 -0.37860 3.82785  
H 3.17428 1.30081 2.48192  
H 0.16988 1.13113 3.92049  
C 0.04447 0.05348 3.77728  
H 1.53677 1.98666 2.35561  
C 1.30445 -0.56793 3.15933  
C 2.25674 1.32257 1.88147  
H 3.65783 -0.89473 1.64620  
H -0.62795 2.28608 2.39212  
H 1.18525 -1.64928 3.09194  
H -2.10937 0.06670 3.78856  
H 2.87448 1.71524 0.89109  
N 1.68576 -0.06360 1.78046  
H -2.37886 2.18011 2.69411  
H -1.30642 -0.25467 3.11052  
C 2.68565 -1.00044 1.14640  
H 2.34261 -2.02006 1.31330  
H -1.57379 1.93084 1.99246  
H -1.42303 -1.32762 2.95357  
H 3.40508 0.21792 -0.48580  
N -1.54008 0.43913 1.78250  
H -1.74708 2.42546 1.03895  
C 2.87448 -0.72467 -0.34515  
H 3.50097 -1.51374 -0.77576  
H -3.54264 -0.32007 1.94677  
O 0.08777 1.40599 -0.14821  
C -2.86400 0.02517 1.15885  
H 1.27598 -2.73016 -1.08337  
N 1.57712 -0.62899 -1.13289  
H -2.49978 -2.02560 0.54729  
H -3.30851 0.92126 0.72379  
H 1.97256 1.39986 -1.66030  
C -2.74370 -1.06597 0.09540  
C 1.24578 -1.93541 -1.82987  
H -1.36729 -2.84082 -1.08721  
H 0.05267 -2.13228 -2.54924  
C 1.73704 0.46231 -2.15942  
H 2.54603 0.19464 -2.84981  
N -1.68306 -0.75228 -0.93187  
H -3.71624 -1.17549 -0.40308  
H -1.38691 -1.98567 -1.76276  
H -2.28761 1.27650 -1.23740  
C -0.09284 -1.94586 -2.58784  
H 0.81782 0.60164 -2.72132  
H -0.09395 -2.86925 -3.18166  
C -2.13023 0.37242 -1.82164  
H -2.23508 -2.13506 -2.44522  
H -1.36786 0.58502 -2.56833  
H -0.12619 -1.13768 -3.32483  
H -3.06181 0.09269 -2.32907  
H -0.09412 3.54611 -1.60777  
C -0.07257 4.21001 -2.48831  
C 1.29137 4.15398 -3.13517  
C 1.49142 3.81783 -4.41876  
C 0.37505 3.46239 -5.37298  
C -0.98737 3.49918 -4.72084  
C -1.18664 3.83559 -3.43731  
H -0.25237 5.21854 -2.07909  
H 2.14067 4.40812 -2.50285  
H 2.50173 3.79936 -4.82365  
H 0.39300 4.14554 -6.23973  
H 0.55559 2.46568 -5.80935  
H -1.83576 3.24222 -5.35274  
H -2.19688 3.85174 -3.03193  
N -0.08580 -2.18526 0.98005  
C -0.13886 -3.29595 1.33325  
C -0.19873 -4.67632 1.77086  
H -1.20078 -5.08162 1.60193

H 0.52553 -5.27800 1.21287  
H 0.03419 -4.74210 2.83819

72  
FeO+CNCH3+CHD syn TS (2/5)  
Fe 0.03113 -0.12109 0.10840  
H -0.07927 0.08067 4.57466  
H 2.11007 -0.03889 3.65033  
H 3.16278 1.47765 2.17416  
H 0.13082 1.47677 3.56100  
C 0.00134 0.39085 3.52459  
H 1.53641 2.16247 1.93231  
C 1.26872 -0.29324 2.99037  
C 2.26155 1.44701 1.54895  
H 3.63818 -0.79860 1.66742  
H -0.64284 2.48802 1.90652  
H 1.14469 -1.37457 3.03207  
H -2.15347 0.40834 3.50990  
H 2.51116 1.73492 0.53029  
N 1.67390 0.06434 1.57387  
H -2.39004 2.41105 2.24741  
H -1.34378 0.02553 2.87211  
C 2.67520 -0.94306 1.05851  
H 2.31210 -1.93558 1.31949  
C -1.59539 2.09657 1.55895  
H -1.46017 -1.05721 2.81323  
H 3.41563 0.10578 -0.67855  
N -1.55666 0.59409 1.48524  
H -1.78325 2.49917 0.56671  
C 2.89776 -0.82680 -0.44923  
H 3.55070 -1.64493 -0.77669  
H -3.57930 -0.10682 1.67927  
O 1.2072 1.40834 -0.58549  
C -2.86443 0.11648 0.87825  
H 1.30259 -2.90732 -0.90710  
N 1.61931 -0.84175 -1.26855  
H -2.47779 -1.99586 0.56890  
H -3.27603 0.94905 0.30547  
H 2.05299 1.07711 -2.08185  
C -2.72423 -1.11347 -0.01933  
C 1.28891 -2.23375 -1.76478  
H -1.32200 -2.02703 -0.92019  
H 2.10158 -2.54201 -2.43805  
C 1.80516 0.08120 -2.44136  
H 2.61151 -0.29665 -3.08302  
N -1.65050 -0.94251 -1.06728  
H 3.68988 -1.30181 -0.50835  
C -1.34387 -2.27937 -1.71187  
H -2.27492 1.01264 -1.67127  
C -0.04320 -2.35334 -2.52516  
H 0.88923 0.15317 -3.02225  
H -0.03952 -3.35092 -2.98359  
C -2.09297 0.03695 -2.11616  
H -2.18616 -2.53002 -2.37201  
H -1.31259 0.15229 -2.86590  
H -0.07192 -1.65622 -3.36795  
H -3.00790 -0.32669 -2.60068  
H 0.15129 2.87854 -1.34550  
C 0.14574 3.89598 -1.88397  
C 1.38698 3.99709 -2.70838  
C 1.37088 4.01224 -4.05637  
C 0.09998 3.97030 -4.86217  
C -1.14563 4.01307 -4.01775  
C -1.12013 3.99829 -2.67014  
H 0.15932 4.59320 -1.03190  
H 2.33361 4.04846 -2.17538  
H 2.30299 4.07830 -4.61254  
H 0.08930 4.80373 -5.58524  
H 0.09007 3.06909 -5.50150  
H -2.09435 4.07973 -4.54507  
H -2.05015 4.05014 -2.10867  
N -0.09354 -2.22181 1.06163  
C -0.15977 -3.28071 1.54989  
C -0.23842 -4.59540 2.15886  
H -1.21646 -5.04439 1.96156  
H 0.53841 -5.24726 1.74793  
H -0.09764 -4.51783 3.24128

72  
FeO+CNCH3+CHD syn Interm (2/5)  
Fe -0.16842 0.28524 -0.22059  
H -0.28150 0.03285 4.31091  
H 1.82113 -0.35691 3.29489  
H 2.84938 1.52779 2.15990  
H 0.07720 1.49581 3.43971  
C -0.18427 0.44257 3.29755  
H 1.28044 2.27715 1.78334  
C 0.94728 -0.33768 2.62816  
C 2.02567 1.56490 1.43646  
H 3.40063 -0.61322 1.25915  
H -0.75369 2.78584 1.91698  
H 0.63401 -1.37168 2.45725  
H -2.33250 0.69329 3.29790  
H 2.40286 1.91008 0.47462  
N 1.41774 0.19719 1.28988

H -2.52000 2.76702 2.10152  
C -1.55475 0.28637 2.63591  
C 2.44613 -0.76719 0.73974  
H 2.10069 -1.77635 0.97137  
C -1.68497 2.45833 1.45959  
H -1.76378 -0.77763 2.49875  
H 2.97970 0.42526 -0.99080  
N -1.69595 0.96550 1.29287  
H -1.77797 2.92653 0.48129  
C 2.63222 -0.58331 -0.75668  
H 3.39328 -1.28333 -1.12606  
H -3.81069 0.60723 1.38952  
O -0.11471 1.80801 -1.12851  
C -3.00237 0.56931 0.64745  
H 1.17244 -2.72867 -0.62822  
N 1.33667 -0.80186 -1.50182  
H -3.76585 -1.57024 0.80374  
H -3.22701 1.31662 -0.11638  
H 1.62476 0.89058 -2.75590  
C -2.92310 -0.82069 0.04014  
C 1.06001 -2.28454 -1.61971  
H -1.23937 -2.77191 -0.21969  
H 1.83474 -2.71407 -2.27133  
C 1.45943 -0.18014 -2.86352  
H 2.29737 -0.63755 -3.40548  
N -1.83302 -0.90419 -1.00532  
H -3.88526 -1.08691 -0.41522  
C -1.48276 -2.36513 -1.20611  
H -2.64245 0.73758 -2.10786  
C -0.32417 -2.64443 -2.16473  
H 0.54721 -0.33439 -3.43635  
H -3.31785 -3.72957 -2.32864  
C -2.31633 -0.28533 -2.28923  
H -2.38913 -2.87131 -1.56724  
H -1.51465 -0.25735 -3.02309  
H -0.50075 -2.20763 -3.15254  
H -3.15258 -0.87216 -2.68828  
H 0.08361 2.74283 -1.36241  
C 0.47188 4.75389 -1.81573  
C 1.71987 4.39813 -2.41184  
C 1.82018 4.14774 -3.75704  
C 0.63477 4.24809 -4.67812  
C -0.63956 4.64688 -3.98492  
C -0.69928 4.88480 -2.63517  
H 0.42543 5.00913 -0.76197  
H 2.60206 4.32866 -1.78191  
H 2.77662 3.88091 -4.19708  
H 0.85497 4.95902 -5.49806  
H 0.49014 3.29046 -5.21456  
H 1.53128 4.75184 -4.59604  
H -1.62780 5.18114 -2.17352  
N 0.58945 -3.78691 1.63400  
C 0.68231 -4.82430 2.17052  
C 0.80085 -6.11300 2.83797  
H 0.05783 -6.81521 2.44833  
H 1.79678 -6.53605 2.67579  
H 0.64232 -6.00148 3.91479

72  
FeO+CNCH3+CHD anti TS (2/3)  
Fe -0.00281 -0.37084 0.01614  
H -2.07068 0.08580 3.85290  
H -3.47390 0.17148 1.90006  
H -3.86433 -1.53868 0.35663  
H -2.01653 -1.47962 3.09329  
H -1.69899 -0.44034 2.96439  
H -2.44973 -2.39199 1.00166  
C -2.38475 0.21799 1.76974  
C -2.78495 -1.68957 0.24267  
H -3.68035 6.00116 -0.63986  
H -0.80937 -2.83957 2.00754  
H -2.09294 1.26754 1.72706  
H 0.19833 -0.66017 3.96608  
H -2.58573 -2.11527 -0.73801  
N -2.07632 -0.37442 0.40320  
H 0.45310 -2.81824 3.25391  
C -0.17454 -0.31613 2.99250  
C -2.58359 0.61777 -0.62653  
H -2.26069 1.60809 -0.30613  
C 0.23137 -2.60295 2.20244  
H 0.12449 0.72353 2.85469  
H -2.44298 -0.66387 -2.35252  
N 0.52630 -1.14546 1.93031  
H 0.85995 -3.23008 1.57718  
C -2.04036 0.28528 -1.99615  
H -2.38475 1.05333 -2.71882  
H 2.30075 -0.80547 3.09425  
O -0.05627 1.18288 0.54846  
C 2.03394 -0.97446 2.04521  
H -0.25026 2.24222 -1.55225  
N -0.52307 0.16625 -1.98341  
H 2.13392 1.11821 1.54217  
H 2.49868 -1.91402 1.74341  
H -0.72501 -1.71083 -2.99183  
C 2.52707 0.16611 1.18978

C 0.10892 1.51167 -2.29534  
H 1.94176 2.09468 -0.28031  
H -0.25971 1.81927 -3.28262  
C -0.15098 -0.79425 -3.08914  
H -0.38676 -0.33115 -4.05410  
N 2.06080 -0.00812 -0.24558  
H 3.62259 0.21374 1.21173  
C 2.30494 1.31581 -0.95100  
H 2.70196 -2.04616 -0.40181  
C 1.63909 1.48658 -2.31449  
H 0.90674 -1.03409 -3.06295  
H 1.96283 2.46592 -2.68937  
C 2.85109 -1.09813 -0.91335  
H 3.39197 1.42977 -1.05455  
H 2.53867 -1.20970 -1.94883  
H 2.01737 0.76287 -3.04320  
H 3.91638 -0.84200 -0.89242  
H -0.11659 3.66500 1.41093  
C 2.06581 4.37983 2.04493  
C -2.08999 4.49961 1.55548  
C -3.16294 4.25763 2.32415  
C -3.07496 3.84428 3.77487  
C -1.65052 3.70441 4.25909  
C -0.57829 3.94606 3.48950  
H -0.13975 5.34014 1.90855  
H -2.22414 4.80494 0.51906  
H -4.16340 4.36553 1.90907  
H -3.61407 4.57308 4.40425  
H -3.61927 2.89745 3.92951  
H -1.51717 3.39738 5.29486  
H 0.42222 3.83527 3.90418  
N 0.06716 -2.32930 -0.66216  
C 0.10976 -3.43267 -1.03527  
C 0.16418 -4.80620 -1.49629  
H 0.53348 -5.45654 -0.69738  
H -0.83370 -5.14329 -1.79283  
H 0.83505 -4.88809 -2.35678

72  
FeO+CNCH3+CHD anti TS (2/3)  
Fe -0.18486 -0.28610 0.07732  
H -2.53515 -0.26855 3.77743  
H -3.81716 -0.29946 1.74630  
H -3.86974 -1.20954 1.06170  
H -2.19191 -1.76977 2.96720  
C -2.03265 -0.68926 2.89654  
H -2.37223 -2.66063 0.85004  
C -0.74029 -0.09277 1.68073  
C -2.77522 -1.98521 0.09856  
H -3.93297 0.17820 -0.79386  
H -0.70664 -2.88735 1.98559  
H -2.59319 0.98618 1.67904  
H -0.19733 -0.65231 4.02895  
H -2.47854 -2.34438 -0.88339  
N -2.26785 -0.59040 0.32537  
H 0.47176 -2.70609 3.30211  
C -0.54846 -0.33670 3.03702  
C -2.85028 0.34340 -0.71658  
H -2.67074 1.35706 -0.36508  
C 0.27365 -2.49953 2.24370  
H -0.40716 0.73930 2.95113  
H -2.46330 -0.85747 -2.46346  
N 0.34909 -1.00789 2.01249  
H 1.02289 -3.00731 1.64291  
C -2.19544 0.12114 -2.06188  
H -2.54864 0.86994 -2.78056  
H 1.95480 -3.36606 3.29466  
O -0.60881 1.33646 0.56927  
C 1.79824 -0.60395 2.23634  
H -0.66231 2.25134 -1.54187  
N -0.67825 0.18246 -1.97358  
H 1.66703 1.47496 1.69189  
H 2.42252 -1.46874 2.00742  
H -0.61393 -1.70546 -2.98116  
C -2.18723 0.57508 1.37252  
H -0.18935 1.58693 -2.26405  
H 1.48556 2.40581 -0.17801  
H -0.53639 1.85311 -3.27202  
C -0.14344 -0.72915 -3.05345  
H -0.37703 -0.29787 -4.03433  
N 1.81571 0.32635 -0.07476  
H 3.26615 0.76062 1.45116  
C 1.95143 1.65134 -0.80758  
H 2.70204 -1.62197 -0.14734  
C 1.33419 1.72896 -2.20398  
H 0.93191 -0.85145 -2.97052  
H 1.57141 2.73249 -2.58050  
C 2.76419 -0.67303 -0.67455  
H 3.02455 1.87727 -0.80787  
H 2.51871 -0.84113 -1.72040  
H 1.82629 1.04115 -2.89860  
H 3.79015 -0.29202 -0.60932  
H -0.24118 2.41116 1.29519  
C -0.16215 3.56575 1.83221  
C -1.40893 2.21005 1.37276

C -2.46052 4.41645 2.19875  
C -2.42471 4.06605 3.66126  
C -1.07341 3.60666 4.13613  
C -0.03436 3.40168 3.29432  
H 0.74425 3.93607 1.33944  
H -1.47251 4.49511 0.32625  
H -3.37180 4.87324 1.82150  
H -2.75849 4.92903 4.26196  
H -3.18204 3.28996 3.87844  
H -0.94699 3.46503 5.20631  
H 0.93189 3.09949 3.69073  
N 0.15203 -2.21683 -0.60653  
C 0.36341 -3.29946 -0.98335  
C 0.62921 -4.64688 -1.45131  
H 0.77737 -5.31878 -0.60031  
H -0.21193 -5.01332 -2.04726  
H 1.53161 -4.65892 -2.06997

72

FeO+CNCH3+CHD anti Inter (2/3)

Fe -0.38689 -0.42655 0.20894  
H -2.70587 -0.94215 3.90497  
H -3.97221 -0.99545 1.86874  
H -3.82624 -2.56101 0.17015  
C -2.17364 -2.32922 3.00027  
C -2.15343 -1.23499 3.00258  
H -2.25309 -3.08939 0.80086  
C -2.93023 -0.65114 1.82427  
C -2.74213 -2.41289 0.10316  
H -4.16715 -0.33420 -0.60512  
H -0.56872 -3.17124 1.94074  
H -2.91879 0.43455 1.89689  
H -0.33169 -1.05395 4.14365  
H -2.41254 -2.65677 -0.90418  
N -2.40715 -0.98713 0.43665  
H 0.58729 -2.93744 3.26807  
C -0.72695 -0.70802 3.17948  
C -3.10949 -0.05181 -0.52712  
H -3.03849 0.94639 -0.10133  
C 0.35642 -2.68199 2.22764  
H -0.72513 0.38196 3.19053  
H -2.60724 -1.07134 -2.35884  
N 0.24175 -1.17714 2.10634  
H 1.15984 -3.04369 1.59264  
C -2.45395 -0.09943 -1.88680  
H -2.89987 0.65245 -2.54812  
H 1.75968 -0.43307 3.44064  
O -1.01876 1.15699 0.84004  
H 1.63361 -0.61750 2.36812  
H -1.19359 2.15162 -1.19355  
N -0.95505 0.13734 -1.78997  
H 1.32710 1.49180 1.98367  
H 2.35522 -1.38661 2.09007  
H -0.66434 -1.64645 -2.93595  
C 1.89317 0.65012 1.58411  
C -0.64827 1.61251 -1.96722  
H 0.92372 2.50281 0.17258  
H -1.03512 1.90777 -2.95183  
C -0.32235 -0.61517 -2.93703  
H -0.62349 -0.14612 -3.88117  
N 1.51555 0.46741 0.12796  
H 2.95382 0.92139 1.65752  
C 1.47411 1.85254 -0.50589  
H 2.66018 -1.33250 -0.08408  
C 0.84454 1.94414 -1.89467  
H 0.76116 -0.60405 -2.86961  
H 0.94760 2.99326 -2.20074  
C 2.57646 -0.35534 -0.55392  
H 2.50934 2.21573 -0.54925  
H 2.33011 -0.49291 -1.60393  
H 1.41766 1.37495 -2.63314  
H 3.54054 0.16098 -0.48233  
H -0.52960 1.65460 1.52456  
C 0.92545 4.55954 2.59104  
C 0.36457 5.24620 1.47656  
C -0.97006 5.14452 1.16963  
C -1.92035 4.30971 1.98909  
C -1.25387 3.60407 3.14302  
C 0.08864 3.74467 3.40689  
H 1.97976 4.66192 2.82248  
H 1.01105 5.86644 0.86154  
H -1.38078 5.67958 0.31791  
H -2.75202 4.93904 2.36216  
H -2.42967 3.57111 1.34173  
H -1.88080 2.99591 3.78947  
H 0.52340 3.23486 4.26288  
N 0.18996 -2.19001 -0.58468  
C 0.51640 -3.21054 -1.04308  
C 0.92322 -4.48094 -1.61143  
H 1.43544 -5.08507 -0.85644  
H 0.04825 -5.03095 -1.97069  
H 1.60484 -4.31471 -2.45134

72

FeO+CNCH3+CHD anti React (2/5)

Fe -0.06035 -0.32476 0.06725  
H -1.36245 -0.29617 4.25837  
H -3.11186 -0.20693 2.66098  
H -3.65372 -1.95025 1.16517  
H -1.28091 -1.78255 3.36155  
C -1.10375 -0.70598 3.27338  
H -2.03048 -2.63786 1.39370  
C -2.08810 -0.05722 2.29225  
C -2.62421 -1.95589 0.78766  
H -3.90841 0.26153 0.18152  
H -0.02135 -2.98112 2.16514  
H -1.90029 1.01653 2.24844  
H 0.94032 -0.71180 3.96846  
H -2.62504 -2.31437 -0.23950  
N -2.05425 -0.57074 0.86168  
H 1.48479 -2.82562 3.09411  
C 0.38981 -0.40580 3.06754  
C -2.83588 0.38741 -0.01561  
H -2.55285 1.39871 0.27821  
C 0.99832 -2.60426 2.13550  
H 0.54012 0.66521 2.92192  
H -2.96411 -0.81176 -1.81017  
N 1.01604 -1.12193 1.88861  
H 1.53763 -3.11700 1.34194  
C -2.57400 0.15954 -1.50101  
H -3.11551 0.91965 -2.07795  
H 2.91266 -0.45707 2.64508  
O -0.17976 1.20022 0.67363  
C 2.45235 -0.69015 1.67681  
H -0.93971 2.25181 -1.38667  
N -1.10593 0.19412 -1.87026  
H 2.15136 1.40442 1.21373  
H 2.99316 -1.54413 1.26566  
H -1.31342 -1.68440 -2.86160  
C 2.59380 0.51851 0.75838  
C -0.65045 1.59791 -2.21140  
H 1.45554 2.37267 -0.52092  
H -1.20252 1.91337 -3.10837  
C -0.89675 -0.69962 -3.06047  
H -1.40225 -0.27239 -3.93592  
N 1.90511 0.31331 -0.57553  
H 3.65949 0.71645 0.58669  
C 1.79304 1.65866 -1.27318  
H 2.75613 -1.61851 -0.91378  
C 0.85707 1.72446 -2.48602  
H 0.16171 -0.80666 -3.28543  
H 1.00525 2.72376 -2.91546  
C 2.66143 -0.66285 -1.42534  
H 2.80686 1.94473 -1.58465  
H 2.13776 -0.82272 -2.36558  
H 1.7442 1.03085 -3.27116  
H 3.66263 -0.26888 -1.63705  
H -0.25564 3.66606 1.54415  
C -0.99194 4.43948 1.81890  
C -1.94095 4.66453 0.66521  
C -3.27086 4.50802 0.75562  
C -3.97929 4.09865 2.02588  
C -3.03104 3.87994 3.18166  
C -1.70132 4.03466 3.08980  
H -0.39279 5.34863 1.99592  
H -1.49494 4.97365 -0.27861  
H -3.89909 4.68980 -0.11450  
H -4.72970 4.86073 2.29697  
H -4.57128 3.18502 1.84798  
H -3.47937 3.58886 4.12984  
H -1.07491 3.86905 3.96461  
N 0.09085 -2.23886 -0.69317  
C 0.17819 -3.32018 -1.11973  
C 0.28933 -4.66581 -1.64645  
H 1.32152 -4.86537 -1.95007  
H -0.00148 -5.39302 -0.88229  
H -0.36411 -4.78567 -2.51588

72

FeO+CNCH3+CHD anti TS (2/5)

Fe -0.14130 -0.23805 0.05287  
H -1.65155 -0.32762 4.17125  
H -3.34368 -0.35242 1.51297  
H -3.74274 -2.07588 0.90454  
H -1.43171 -1.79639 3.26849  
C -1.32719 -0.70912 3.19404  
H -2.11569 -2.67681 1.29631  
C -2.32115 -0.12546 2.17872  
C -2.68101 -2.02555 0.63103  
H -4.03474 0.14115 -0.03638  
H -0.05068 -2.89879 2.12831  
H -2.20873 0.95851 2.15295  
H 0.67787 -0.57177 3.98334  
H -2.55780 -2.38541 -0.38876  
N -2.18782 -0.61660 0.75108  
H 1.37962 -2.65123 3.15526  
C 0.15261 -0.30686 3.05409  
C -2.95673 0.30731 -0.16808  
H -2.72967 1.32807 0.13838  
C 0.94397 -2.46059 2.16578

H 0.23658 0.77049 2.90782  
H -2.95805 -0.88682 -1.96851  
N 0.88627 -0.98048 1.91157  
H 1.56181 -2.94106 1.16105  
C -2.60427 0.09193 -1.63911  
H -3.13063 0.84087 -2.24419  
H 2.68650 -0.17732 2.76890  
O -0.36865 1.34626 0.64277  
C 2.30762 -0.46440 1.77981  
H -1.02755 2.22995 -1.52282  
N -1.11732 0.15564 -1.93586  
H 1.94108 1.59825 1.22846  
H 2.92259 -1.29743 1.43402  
H -1.22555 -1.76201 -2.86212  
C 2.45313 0.72321 0.83021  
C -0.68699 1.55953 -2.31261  
H 1.33986 2.48679 -0.58444  
H -1.21225 1.82575 -3.24151  
C -0.82477 -0.77451 -3.07952  
H -1.29324 -0.39483 -3.99686  
N 1.86150 0.44805 -0.53535  
H 3.51998 0.96414 0.72605  
C 1.72762 1.75416 -1.29201  
H 2.79572 -1.46006 -0.75731  
C 0.82679 1.72968 -2.53594  
H 2.64685 -0.86370 -3.24195  
H 0.95322 2.71276 -3.00826  
C 2.70690 -0.52144 -1.30137  
H 2.73775 2.06855 -1.59085  
H 2.25411 -0.72802 -2.27014  
H 1.19586 1.01214 -3.27591  
H 3.70885 -0.10210 -1.45955  
H -0.64484 2.79326 1.17622  
C -0.89010 3.87332 1.56368  
C -1.93976 4.43890 0.67147  
C -3.21065 4.64010 1.07906  
C -3.67128 4.36040 2.48363  
C -2.55784 3.95805 3.41195  
C -1.29008 3.75853 2.99336  
H 0.08599 4.36307 1.43451  
H -1.65138 4.67824 -0.34918  
H -3.94828 5.04341 0.38974  
H -4.19337 5.24404 2.88815  
H -4.45203 3.57798 2.47372  
H -0.80868 3.85212 4.46449  
H -2.51689 3.48755 3.70854  
N 0.15795 -2.27874 -0.70426  
C 0.32567 -3.36399 -1.09681  
C 0.53406 -4.71521 -1.58221  
H 1.58812 -4.86638 -1.83355  
H 0.24763 -5.43952 -0.81378  
H -0.07023 -4.89253 -2.47689

72

FeO+CNCH3+CHD anti Inter (2/5)

Fe -0.16778 -0.19934 0.08979  
H -1.61946 -0.39627 4.21684  
H -3.34186 -0.42363 2.59025  
H -3.77093 -2.10067 0.09398  
H -1.39772 -1.84845 3.28778  
C -1.30843 -0.75893 3.28781  
H -2.14453 -2.70741 1.32504  
C -2.33011 -0.17448 2.23944  
C -2.70894 -2.04759 0.66690  
H -4.06659 0.12776 0.03636  
H -0.03146 -2.91495 2.09872  
H -2.23471 0.91133 2.22965  
H 0.70695 -0.61216 3.98648  
H -2.58546 -2.39740 -0.35658  
N -2.21225 -0.64245 0.80187  
H 1.40191 -2.67089 3.12317  
C 0.16480 -0.33738 3.07020  
C -2.98904 0.29479 -0.09936  
H -2.75783 1.31044 0.21870  
C 0.96017 -2.47031 2.13860  
H 0.23641 0.74271 2.94060  
H -3.00425 -0.87142 -1.91775  
N 0.89043 -0.98691 1.90586  
H 1.57818 -2.93527 1.37414  
C -2.64712 0.10199 -1.57661  
H -3.17609 0.86062 -2.16674  
H 2.69253 -0.17679 2.75681  
O -0.41753 1.46636 0.72629  
C 2.31072 -0.46011 1.76800  
H -1.06487 2.24563 -1.48082  
N -1.15966 0.16737 -1.88804  
H 1.93794 1.60424 1.22926  
H 2.92702 -1.28896 1.41502  
H -1.28007 -1.74741 -2.81986  
C 2.44733 0.73199 0.82217  
C -0.73408 1.57343 -2.27300  
H 1.33294 2.50485 -0.58207  
H -1.27295 1.83557 -3.19496  
C -0.87998 -0.75996 -3.03768  
H -1.35747 -0.37582 -3.94823

N 1.84495 0.46202 -0.54079  
H 3.51336 0.97524 0.71308  
C 1.70291 1.76863 -1.29526  
H 2.77930 -1.44393 -0.77772  
C 0.77651 1.74526 -2.52157  
H 0.18985 -0.84984 -3.21090  
H 0.89261 2.72888 -2.99539  
C 2.68535 -0.50260 -1.31658  
H 2.70704 2.07995 -1.61676  
H 2.22341 -0.70662 -2.28177  
H 1.13269 1.02851 -3.26857  
H 3.68601 -0.08312 -1.48320  
H -0.54978 2.37665 1.06517  
C -0.77198 4.44101 1.77836  
C -1.69773 4.73191 0.73149  
C -3.05053 4.58871 0.91417  
C -3.63737 4.13826 2.26207  
C -2.60269 3.85413 3.28304  
C -1.25933 4.01153 3.04934  
H 0.28938 4.61232 1.63108  
H -1.31681 5.07702 -0.22574  
H -3.74136 4.81756 0.10778  
H -4.35513 4.89627 2.59658  
H -4.27640 3.24770 2.07096  
H -2.95683 3.53034 4.25755  
H -0.54683 3.81068 3.84458  
N 0.13315 -2.27942 -0.70254  
C 0.29760 -3.36151 -1.10581  
C 0.50179 -4.70897 -1.60406  
H 1.155136 -4.85474 -1.87644  
H 0.23271 -5.43951 -0.83525  
H -0.11866 -4.88301 -2.48826

88

FeO+CNCH3+CHD+CI anti Re (0/3)

Fe -0.23299 -0.59272 -0.18397  
H -1.04716 0.13081 4.05999  
H -2.92840 -0.60838 2.75543  
H -3.18867 -2.65653 1.66582  
H -0.71871 -1.49666 3.52965  
C -0.81449 -0.46748 3.16974  
H -1.44574 -2.94361 1.83330  
C -2.01111 -0.30293 2.23517  
C -2.21320 -2.53378 1.18111  
H -4.03611 -0.82806 0.42762  
H 0.46685 -2.68847 2.22817  
H -2.10540 7.74976 1.96837  
H -1.82178 0.05476 3.43484  
H -2.20808 -3.08713 0.24515  
N -1.96192 -1.07515 0.92720  
H 1.97188 -2.06123 2.92992  
C 0.51571 0.06166 2.62922  
C -3.05891 -0.51002 0.04423  
H -3.00656 0.57547 0.11106  
C 1.38149 -2.14708 2.01036  
H 0.40003 1.08499 2.27143  
H -3.02948 -2.04594 -1.46847  
N 1.08506 -0.76144 1.48776  
H 1.95667 -2.70403 1.27643  
C -2.88410 -0.96773 -1.38335  
H -3.62711 -0.47318 -2.01733  
H 2.92184 0.28366 1.88111  
O -0.62401 0.96079 0.16988  
C 2.40768 -0.16930 1.02588  
H -1.80629 1.44577 -1.81118  
N -1.48594 -0.65033 -1.90006  
H 1.65410 1.71980 0.29470  
H 3.03159 -0.99192 0.67368  
H -1.34960 -2.67633 -2.57588  
H 2.02638 0.85315 -0.06795  
C -1.47389 0.72154 -2.55378  
H 0.60710 2.20059 -1.41606  
H -2.21499 0.69586 -3.36254  
C -1.16847 -1.67708 -2.96087  
H -1.82322 -1.50793 -3.82346  
N 1.40508 0.25675 -1.21004  
H 3.17720 1.19678 -0.44618  
C 0.96596 1.42061 -2.08613  
H 2.58449 -1.52468 -1.38902  
C -0.11285 1.12364 -3.12387  
H -0.13522 -1.60362 -3.28353  
H -0.26897 2.06850 -3.65884  
C 2.26341 -0.68655 -2.00308  
H 1.86671 1.79560 -2.59122  
H 1.70838 -0.10739 -2.85510  
H 0.23188 0.40982 -3.87801  
H 1.34641 -0.15282 -2.37302  
H 0.04648 4.32976 4.08933  
C -0.99305 4.62537 3.40974  
C -1.63831 5.19689 3.06893  
C -2.78704 4.73693 2.55148  
C -3.57507 3.59528 3.14954  
C -2.90221 2.98755 4.35809  
C -1.75246 3.44741 4.87537  
H -0.89509 5.41028 5.07963



C 2.51975 5.86611 -1.64678  
F 3.20434 6.64667 -2.56813  
F 2.76068 6.40356 -0.39070  
F 3.09268 4.60182 -1.67605  
S 3.25810 3.54754 3.99744  
O 2.10038 2.61201 2.96794  
O 4.57131 2.93718 3.66845  
O 3.26587 4.51172 5.12683  
C 2.93961 4.64994 2.52174  
F 3.93640 5.60122 2.37753  
F 2.89025 3.91778 1.34199  
F 1.73246 5.32803 2.63749

88

FeO/CNCH3+CHD+CI anti Im (0/5)

Fe -0.14887 -0.21879 0.11744  
H -2.12801 -0.39265 4.02731  
H -3.62374 -0.31013 2.19548  
H -3.91050 -1.97147 0.51812  
H -1.84800 -1.84139 3.10736  
C -1.70620 -0.75606 3.08085  
H -2.35158 -2.65116 1.04279  
C -2.56346 -0.11401 1.97883  
C -2.82559 -1.95708 0.34971  
H -3.99851 0.28262 -0.41416  
H -0.37143 -2.95374 2.10330  
H -2.41067 0.96471 1.99541  
H 0.19585 -0.70762 4.09637  
H -2.61838 -2.29310 -0.66492  
N -2.28945 -0.57728 0.56248  
H 0.93819 -2.77399 3.29418  
C -0.20970 -0.39557 3.12289  
C -2.90590 0.40135 -0.41454  
H -2.67334 1.40280 -0.05576  
C 0.62372 -2.54594 2.26733  
H -0.07280 0.68163 3.02732  
H -2.75790 -0.74173 -2.24086  
N 0.63460 -1.05930 2.05120  
H 1.31225 -3.02346 1.57370  
C -2.39297 0.20666 -1.84149  
H -2.80404 0.99971 -2.47859  
H 2.32292 -0.28494 3.13544  
O -0.39487 1.45317 0.73516  
C 2.07785 -0.57851 2.10790  
H -0.70549 2.26984 -1.54305  
N -0.87778 0.19284 -1.96707  
H 1.85661 1.48898 1.52568  
H 2.71002 -1.43164 1.85426  
H -0.99010 -1.71390 -2.91693  
C 2.37807 0.59901 1.18363  
C -0.32882 1.57133 -2.28984  
H 1.54241 2.40973 -0.36651  
H -0.73509 1.86127 -3.27015  
C -0.50767 -0.75215 -3.07542  
H -0.83915 -0.34151 -4.03799  
N 1.94866 0.34051 -0.24463  
H 3.45730 0.80397 1.21169  
C 1.96560 1.64651 -1.01671  
H 2.82563 -1.60495 -0.35223  
C 1.20677 1.65569 -2.35106  
H 0.56843 -0.90618 -3.10918  
H 1.42800 2.63061 -2.80231  
C 2.84308 -0.66359 -0.89919  
H 3.01684 1.90598 -1.20413  
H 2.51063 -0.85320 -1.91935  
H 1.61525 0.91504 -3.04667  
H 3.87371 -0.28602 -0.92802  
H -0.64414 2.34922 1.04650  
C -1.39791 4.23969 1.88352  
C -2.66624 4.37090 1.24177  
C -3.83329 4.05433 1.88973  
C -3.84816 3.56375 3.31413  
C -2.47522 3.44041 3.92250  
C -1.33708 3.77442 3.23109  
H -0.50055 4.55912 1.36573  
H -2.69481 4.73492 0.21837  
H -4.79050 4.16365 1.38734  
H -4.47725 4.23137 3.93577  
H -4.38007 2.59457 3.37615  
H -2.41236 3.08698 4.94816  
H -0.36477 3.67771 3.70573  
N 0.15307 -2.31459 -0.64996  
C 0.32505 -3.39975 -1.04139  
C 0.54270 -4.74920 -1.52909  
H 1.04097 -4.72223 -2.50276  
H 1.17008 -5.30731 -0.82768  
H -0.41320 -5.27025 -1.63734  
S 0.71166 5.72649 -1.99207  
O 0.20841 4.82429 -0.92223  
O 0.67822 5.15813 -3.36514  
O 0.28735 7.14486 -1.87867  
C 2.54160 5.82202 -1.63808  
F 3.18729 6.63141 -2.56256  
F 2.79499 6.34898 -0.38016  
F 3.14423 4.57273 -1.69604

S 3.21371 3.52631 4.02337  
O 2.07254 2.57294 3.95181  
O 4.54852 2.93587 3.74923  
O 3.16224 4.49468 5.14803  
C 2.93529 4.61616 2.53035  
F 3.91552 5.58948 2.42461  
F 2.95457 3.87835 1.35312  
F 1.70924 5.26638 2.59093

## [(TMC)FeOO]<sup>2+</sup> (4)

53

FeOO syn (2/1)

Fe -0.07039 0.07349 -0.04811  
H 1.70330 -1.62243 -3.68868  
H -0.66761 -1.30318 -3.70566  
H -1.56014 0.94548 -3.69581  
H 1.44618 0.09535 -3.57459  
C 1.32866 -0.83907 -3.01819  
H -0.07084 1.57595 -2.96892  
C -0.13787 -1.16268 -2.75468  
C -1.04720 1.15315 -2.74996  
H -2.89878 -0.61368 -2.61503  
H 1.71730 1.78168 -2.24841  
H -0.20912 -2.10043 -2.19444  
H 3.26688 -0.78761 -2.06421  
H -1.62172 1.88609 -2.18558  
N -0.91197 -0.11883 -1.95918  
H 3.37246 1.51675 -1.67463  
C 2.21203 -0.87195 -1.77326  
C -2.29196 -0.69291 -1.70578  
H -2.17400 -1.75460 -1.47976  
C 2.31948 1.55688 -1.37319  
H 2.08480 -1.82999 -1.26171  
H -3.10574 1.08898 -0.79818  
N 1.92900 0.23111 -0.76619  
H 2.18942 2.34865 -0.63833  
C -2.94635 0.03622 -0.55768  
H -3.92640 -0.39773 -0.32872  
H 3.81317 -0.29837 0.12443  
O 0.05359 2.11285 0.29767  
C 2.81687 0.02539 0.44760  
H -2.08543 -2.15758 0.64925  
N -2.05948 -0.02789 0.67282  
H 2.10778 -1.96467 0.89077  
H 2.93417 0.99113 0.94229  
H -2.48344 2.03200 1.06487  
C 2.19475 -0.98956 1.37452  
C -2.27753 -1.36202 1.37430  
H 0.20114 -2.55734 1.57869  
H -3.33778 -1.41234 1.65321  
C -2.50675 1.08209 1.59400  
H -3.53426 0.88626 1.92043  
N 0.79963 -0.53918 1.70668  
H 2.80450 -1.12098 2.27621  
C 0.07735 -1.75805 2.31603  
H 1.39210 1.41823 2.39845  
C -1.40779 -1.57320 2.61235  
H -1.86850 1.14972 2.46916  
H -1.74835 -2.50568 3.07914  
C 0.90118 0.53692 2.80917  
H 0.60515 -2.06289 3.22896  
H -0.08629 0.82512 3.15819  
H -1.58015 -0.79708 3.36373  
H 1.47845 0.16456 3.66286  
O -0.76710 2.99947 -0.13989

53

FeOO syn TI (2/3)

Fe -0.07109 0.19194 -0.03188  
H 1.71111 -1.66712 -3.65850  
H -0.66822 -1.34530 -3.69442  
H -1.58411 0.94088 -3.65127  
H 1.43434 0.04884 -3.58993  
C 1.32441 -0.87162 -3.00992  
H -0.03440 1.50156 -2.99762  
C -0.13997 -1.20492 -2.74250  
C -1.01797 1.12711 -2.73216  
H -2.89725 -0.62286 -2.59683  
H 1.75957 1.76858 -2.29942  
H -0.21002 -2.14103 -2.18017  
H 3.25903 -0.77559 -2.05874  
H -1.52262 1.88470 -2.13525  
N -0.90292 -0.15996 -1.95364  
H 3.38478 1.56591 -1.62208  
C 2.20621 -0.86594 -1.76465  
C -2.29384 -0.70012 -1.68549  
H -2.20056 -1.75992 -1.44166  
C 2.31528 1.58430 -1.38522  
H 2.09027 -1.81266 -1.23230  
H -3.04060 1.13115 -0.80969  
N 1.93204 0.25804 -0.77549  
H 2.10595 2.37830 -0.67251  
C -2.92820 0.07589 -0.55686

H -3.92357 -0.31725 -0.32291  
H 3.81160 -0.23395 0.13345  
O 0.04052 2.12759 0.28918  
C 2.80455 0.05699 0.45273  
H -2.09583 -2.13059 0.62860  
N -2.05667 -0.00076 0.68698  
H 2.12931 -1.95921 0.85339  
H 2.88834 1.01969 0.95929  
H -2.40867 2.06100 1.09618  
C 2.19954 -0.99159 1.35323  
C -2.27085 -1.34647 1.36906  
H 0.19886 -2.58340 1.54090  
H -3.32963 -1.38603 1.65332  
C -2.49718 1.10840 1.61175  
H -3.54289 0.93669 1.88950  
N 0.79792 -0.57150 1.75279  
H -0.62075 -1.12895 2.25330  
C 0.08089 -1.79487 2.28985  
H 1.30367 1.41972 2.37517  
C -1.40054 -1.59819 2.59742  
H -1.89281 1.12894 2.51254  
H -1.75328 -2.53818 3.03877  
C 0.88270 0.51102 2.80163  
H 0.60990 -2.11194 3.19796  
H -0.10413 0.74156 3.19077  
H -1.51775 -0.84105 3.36985  
H 1.51183 0.16231 3.62762  
O -0.87636 3.02140 -1.17309

53

FeOO syn TII (2/3)

Fe -0.05603 0.09066 -0.04319  
H 1.69874 -1.64601 -3.67155  
H -0.67629 -1.35560 3.66657  
H -1.51775 0.88178 -3.73993  
H 1.42284 0.07089 -3.58979  
C 1.32200 -0.85325 -3.01369  
H -0.06982 1.57012 -2.98114  
C -0.13780 -1.18540 -2.72585  
H -1.04328 1.13189 -2.78469  
H -2.90392 -0.59410 -2.60812  
H 1.68110 1.78477 -2.26749  
H -0.19868 -2.10797 -2.13940  
H 3.26632 -0.73496 -2.07698  
H -1.64475 1.86468 -2.25319  
N -0.91200 -0.11951 -1.95661  
C 3.32845 1.57619 -1.65389  
C 2.21752 -0.85179 -1.77795  
C -2.29870 -0.67701 -1.69881  
H 2.12916 -1.73894 -1.46690  
C 2.26879 1.58656 -1.37683  
H 2.12499 -1.80982 -1.25976  
H -3.06289 1.13010 -0.80163  
N 1.91145 0.24816 -0.77357  
H 2.09443 2.37392 -0.64763  
H -2.93491 0.07452 -0.55724  
H -3.92461 -0.33271 -0.32211  
H 0.80301 -0.23574 0.12151  
O 0.55738 1.90758 0.53238  
C 2.79973 0.06233 0.44525  
H -2.10801 -2.13598 0.63616  
N -2.04807 -0.00485 0.67271  
H 2.11963 -1.94365 0.87661  
H 2.88857 1.03014 0.94056  
H -2.43569 2.05801 1.06900  
C 2.19757 -0.97063 1.36563  
C -2.28161 -1.34184 1.36710  
H 0.18883 -2.54834 1.52856  
H -3.34072 -1.37497 1.65096  
C -2.48386 1.10841 1.59564  
H -3.51647 0.92266 1.91054  
N 0.79941 -0.53508 1.76379  
H 2.81105 -1.10070 2.26396  
H 0.07192 -1.76688 2.28599  
H 1.39695 1.40162 2.45201  
C -1.40860 -1.57607 2.59761  
H -1.85028 1.16151 2.47440  
H -1.75289 -2.51262 3.05282  
C 0.89632 0.51585 2.83694  
H 0.60596 -2.09597 3.18629  
H -0.92029 0.80531 3.17967  
H -1.57011 -0.80898 3.36014  
H 1.46030 0.11295 3.68469  
O -0.59725 2.78030 -0.24541

53

FeOO syn sideon (2/3)

Fe -0.00471 0.02683 -0.01768  
H 0.00089 -0.05812 4.42823  
H 2.13847 -0.15762 3.36247  
H 2.75199 1.86080 2.31123  
H 0.17446 1.44531 3.56661  
C 0.04340 0.36947 3.41918  
H 1.13388 2.39627 1.80529  
C 1.24915 -0.25925 2.72691

C 1.98693 1.78523 1.53051  
H 3.69301 -0.06711 1.26330  
H -0.77748 2.59069 1.93159  
H 1.07173 -1.32787 2.56948  
H -2.11642 0.40396 3.38962  
C 2.38768 2.16365 0.59347  
N 1.59001 0.33972 1.37757  
H -2.52094 2.35447 1.14201  
C -1.29405 0.40299 2.75969  
C 2.76604 -0.42594 0.80200  
H 2.65155 -1.47648 1.07354  
C -1.66357 2.14092 1.49411  
H -1.39588 -1.04052 2.66948  
H 2.94154 0.81267 -0.96164  
N -1.50846 0.64447 1.37745  
C -1.83655 2.56733 0.50932  
C 2.38825 -0.23666 -0.69479  
H 3.63785 -0.79980 -1.13691  
H -3.57761 0.11266 -1.51974  
O -0.77391 1.54476 -1.37092  
C -2.80150 0.09509 0.79824  
H 1.74637 -2.60242 -0.40004  
N 1.50240 -0.70015 -1.31919  
H -2.28947 -2.11991 -1.99171  
H -3.11395 0.77084 0.00089  
H 1.46299 0.96395 -2.65547  
C -2.59254 -1.30822 0.28111  
C 1.50523 -2.21999 -1.39443  
H -0.64843 -3.03197 0.09820  
H 2.32601 -2.49853 -2.06701  
C 1.43586 -0.12130 -2.71177  
H 2.29929 -0.48008 -3.28251  
N -1.50513 -1.30685 -0.77641  
H -3.51957 -1.70078 -0.15189  
C -0.95891 -2.71589 -0.90274  
H -2.61856 0.09132 -1.95358  
C 0.20602 -0.85340 -1.87721  
H 0.52808 -0.43339 -3.21863  
H 0.40854 -3.93305 -1.97113  
C -2.10802 -0.85976 -2.08346  
H -1.78889 -3.36212 -2.21602  
H -1.34402 -0.73384 -2.84339  
H -0.06346 -2.52780 -2.88409  
H -2.82607 -1.61656 -2.41910  
O 0.38525 2.02898 -0.80020

53

FeOO syn QI (2/5)

Fe 6.76604 3.99696 5.29152  
H 3.12792 4.26992 2.79385  
H 2.76716 4.05434 5.15872  
H 3.42704 5.80698 6.66440  
H 3.80215 5.69543 3.52869  
C 3.94737 4.61547 3.43587  
H 4.53907 6.42899 5.42841  
C 3.78232 3.89843 4.72216  
C 4.45004 5.75683 6.27703  
H 3.62256 6.70959 7.57831  
H 5.11688 6.37378 8.85203  
H 3.92552 2.82297 4.63067  
H 5.20848 4.69392 1.68570  
H 5.15172 6.07889 7.04440  
N 4.74963 4.33338 5.85946  
H 6.42374 6.11672 2.22842  
C 5.24130 4.27778 2.70017  
C 4.54064 3.49133 2.55715  
H 4.39756 2.40530 6.67807  
C 6.53232 6.31092 3.27470  
H 5.33483 3.19301 2.61061  
H 5.86350 4.51140 8.37055  
N 6.51494 4.80232 3.34740  
H 7.47677 6.68106 3.66486  
C 5.73259 3.50195 7.97802  
H 5.61249 2.82783 8.83315  
H 7.49906 4.38728 1.48599  
O 8.52979 5.48561 5.62871  
C 7.10343 4.29413 2.55715  
H 6.15453 1.24463 6.74844  
N 7.00116 3.13428 7.22263  
H 7.17548 2.20009 2.69217  
H 8.55289 4.94857 2.78404  
H 8.05830 4.76654 8.10290  
C 8.01359 2.86010 2.92332  
C 7.09814 1.61641 7.15506  
H 7.14645 0.98073 4.47865  
H 7.18081 1.26074 8.18950  
C 8.17101 3.68997 7.99666  
H 8.19226 3.22606 8.98915  
N 8.28660 2.75970 4.41133  
H 8.88314 2.49577 2.36247  
C 8.13041 1.31004 4.82708  
H 9.82571 4.25008 4.34481  
C 8.25538 1.60206 6.32785  
H 9.10719 3.48104 7.48834  
H 8.23960 -0.02574 6.46858

C 9.69517 3.22443 4.67981  
 H 8.88975 0.72939 4.28746  
 H 9.91588 3.18528 5.74184  
 H 9.22497 1.38792 6.71584  
 H 10.39283 2.56855 4.14666  
 O 7.78831 6.55841 6.28446

53

FeO syn QII (2/5)  
 Fe 6.83796 4.15611 5.33092  
 H 3.11363 4.32758 2.81174  
 H 2.77725 3.94197 5.11838  
 H 3.28593 5.73321 6.62749  
 H 3.81730 5.71588 3.58770  
 C 3.95439 4.64000 3.44367  
 H 4.49069 6.42540 5.51381  
 C 3.81164 3.86766 4.75719  
 C 4.33935 5.71730 3.62637  
 H 3.61287 3.61104 7.58078  
 H 5.73371 6.81035 3.67061  
 H 4.02919 2.80883 5.48484  
 H 5.13643 4.75976 1.63648  
 H 4.96305 6.02600 7.16529  
 N 4.71765 4.32524 5.88646  
 H 6.48892 6.64845 2.06840  
 C 5.22262 4.33359 2.64487  
 C 4.54605 3.37494 7.05553  
 H 4.44712 2.36590 6.65088  
 C 5.56139 6.36123 3.12377  
 H 5.32113 3.25075 2.53758  
 H 5.82012 4.48023 8.41465  
 N 6.51502 4.85900 3.24417  
 H 7.49972 6.72837 3.53773  
 C 5.72064 3.46942 8.01403  
 H 5.56829 2.79368 8.86447  
 H 7.48480 4.32059 1.40780  
 O 8.31065 5.49579 5.64991  
 H 6.9215 4.28155 2.48419  
 H 6.19224 1.23907 6.81097  
 N 7.02368 3.12263 7.32149  
 H 7.12426 2.19987 7.20991  
 H 8.55193 4.92718 2.67286  
 H 8.04772 4.75445 8.23423  
 C 7.97906 2.85024 9.05026  
 H 7.13761 1.61486 7.20955  
 H 7.10159 1.02460 4.53385  
 H 7.24508 1.22420 8.23061  
 C 8.16123 3.67533 8.13657  
 H 8.15627 3.21918 9.13362  
 N 8.28777 2.76678 4.38540  
 H 8.82846 2.45598 2.33438  
 C 8.10671 1.33146 4.83976  
 H 9.85321 4.22209 4.24078  
 C 8.28303 1.09677 7.634002  
 H 9.11411 3.46357 6.55595  
 H 8.30615 0.09099 6.48172  
 C 9.70438 3.21719 4.62947  
 H 8.82877 0.71990 4.82841  
 H 9.92236 3.23178 5.69431  
 H 9.25521 1.45117 6.69561  
 H 10.39238 2.52448 4.13099  
 O 8.07373 6.55699 6.43552

53

FeO syn QIII (2/5)  
 Fe 6.85649 4.15003 5.33282  
 H 3.12000 4.31573 2.81083  
 H 2.78748 3.89566 5.10900  
 C 3.24937 5.71126 6.58469  
 H 3.81259 5.70263 3.59971  
 C 3.95873 4.62930 3.44494  
 H 4.48980 6.41917 5.51959  
 C 3.82542 3.84517 4.75278  
 C 4.31296 5.70363 6.32045  
 H 3.61970 3.60110 7.58627  
 H 5.72706 6.81242 3.68192  
 H 4.06471 2.79163 4.57515  
 H 5.13750 4.77782 1.63802  
 H 4.90350 6.00893 7.18439  
 N 4.71658 4.31590 5.88652  
 H 6.48921 6.66591 2.08224  
 C 5.22956 4.34263 2.64253  
 C 4.55324 3.37033 7.05860  
 H 4.45975 2.35886 6.65832  
 C 5.55875 6.36930 3.13571  
 H 5.33421 3.26148 2.52354  
 H 5.82852 4.49108 8.40353  
 N 6.51681 4.86788 3.24763  
 H 7.49298 6.74050 3.55578  
 C 5.72967 3.47493 8.01547  
 H 5.57525 2.81032 8.87482  
 H 7.49181 4.33932 1.40977  
 O 8.24867 5.47589 5.68589  
 H 6.69483 4.29738 2.48729  
 H 6.18955 1.23791 6.84262

N 7.03262 3.12162 7.32989  
 H 7.12925 2.21456 2.70127  
 H 8.55395 4.94283 2.68066  
 H 8.07773 4.75147 8.22528  
 C 7.98257 2.86452 2.90439  
 C 7.14172 1.61431 7.22428  
 H 7.05770 1.06068 4.54418  
 H 7.26639 1.22316 8.24355  
 C 8.16801 3.66782 8.15111  
 H 8.14235 3.23245 9.15764  
 N 8.28060 2.77616 4.38673  
 H 8.83560 2.47205 2.33782  
 C 8.07441 1.34309 4.83653  
 H 9.87846 4.19027 4.21218  
 C 8.26927 1.09288 6.33271  
 H 9.12292 3.42573 7.68848  
 H 8.28449 0.00367 6.46889  
 C 9.70329 3.20370 4.63686  
 H 8.77291 0.71789 4.26433  
 H 9.90764 3.25029 5.70352  
 H 9.25014 1.43552 6.67263  
 H 10.38444 2.48228 4.17066  
 O 8.20547 6.65764 6.26191

53

FeO syn QSI (2/5)  
 Fe -0.08876 0.36011 -0.01863  
 H 1.70512 -1.61019 -3.67230  
 H -0.65234 -0.15860 -3.56202  
 H -1.46987 0.71052 -3.83737  
 H 1.34317 0.08994 -3.59619  
 H 1.31885 -0.83004 -3.00489  
 H -0.14341 1.54924 -2.99602  
 C -0.11144 -1.23511 -2.64958  
 C -1.09356 1.04036 -2.86271  
 H -2.91940 -0.71586 -2.55353  
 H 1.83145 1.85905 -2.31560  
 H -0.10095 -2.10334 -1.98338  
 H 3.30704 -0.62774 -2.18063  
 H -1.79854 1.74322 -2.42346  
 N -0.93675 -0.16105 -1.96523  
 H 3.45387 1.68277 -1.61595  
 C 2.28004 -0.76768 -1.81846  
 C -2.30610 -0.72844 -1.64526  
 H -2.17288 -1.77183 -1.35356  
 C 2.38009 1.67376 -1.39495  
 H 2.24730 -1.72015 -1.28508  
 H -3.10231 1.11783 -0.83399  
 N 2.00290 0.33547 -0.81427  
 H 2.14819 2.45568 -0.67423  
 C -2.98187 0.07190 -0.54643  
 H -3.98150 -0.33224 -0.34682  
 H 3.84534 -0.19721 1.04530  
 O 0.19798 2.15291 0.82766  
 C 2.82938 0.10071 0.43129  
 H -2.28295 -2.07434 0.69532  
 N -2.16168 0.04321 2.18966  
 H 2.10593 -1.91464 0.77072  
 H 2.90302 1.05215 0.96094  
 H -2.41789 2.12668 1.08706  
 C 2.20037 -0.96797 1.30570  
 C -2.37181 -1.27714 1.43677  
 H 0.07383 -2.48787 1.31732  
 H -3.40487 -1.28608 1.80865  
 C -2.59689 1.18651 1.60549  
 H -3.66517 1.08627 1.82968  
 N 0.81155 -0.55462 1.75531  
 H 2.82256 -1.14902 2.18966  
 C 0.04278 -1.79739 2.16629  
 H 1.59129 1.22631 2.64714  
 C -1.40705 -1.55854 2.58906  
 H -2.04025 1.18080 2.53947  
 H -1.75150 -2.48866 3.05714  
 C 0.92807 0.40511 2.91186  
 H 0.59838 -2.25847 2.99349  
 H -0.04203 0.81982 3.17084  
 H -1.47960 -0.79905 3.37288  
 H 1.33739 -0.12827 3.77077  
 O -0.45811 2.28269 -0.41557

53

FeO syn QSII (2/5)  
 Fe -0.00422 0.02487 -0.01548  
 H 0.00085 -0.05380 4.42678  
 H 2.13815 -0.15236 3.36218  
 H 2.76033 1.86130 3.30994  
 H 0.17063 1.44884 3.56280  
 C 0.04228 0.37240 3.41706  
 H 1.14170 2.40082 1.81046  
 C 1.24953 -0.25437 2.72570  
 C 1.99257 1.78831 1.53159  
 H 3.69401 -0.06685 1.26430  
 H -0.77467 2.59021 1.91869  
 H 1.07279 -1.32309 2.56807  
 H -2.11797 0.39970 3.38784

H 2.39196 2.16761 0.59412  
 N 1.59115 0.34455 1.37626  
 H -2.51499 2.35123 2.15404  
 C -1.29432 0.04175 2.75788  
 C 2.76637 -0.42413 0.80312  
 H 2.64938 -1.47406 1.07605  
 C -1.66628 2.13849 1.49464  
 H -1.39230 -1.04215 2.66744  
 H 2.94710 0.80952 -0.96314  
 N -1.50938 0.64234 1.37509  
 H -1.85451 2.56545 0.51270  
 C 2.80993 -0.23888 -0.69418  
 H 3.63836 -0.80536 -1.13427  
 H -3.57771 0.10747 1.57557  
 O -0.76305 1.52875 -1.37139  
 C -2.80372 0.09304 0.79966  
 H 1.74333 -2.60245 -0.39833  
 N 1.50255 -0.69986 -1.31721  
 H -2.28795 -1.99255 1.07222  
 H -3.12051 0.76959 0.00454  
 H 1.48006 0.96201 -2.65766  
 C -2.59314 -1.30836 0.27873  
 C 1.50526 -2.21960 -1.39333  
 H -0.64879 -3.02735 0.09573  
 H 2.32729 -2.49911 -2.06394  
 C 1.43829 -0.12310 -2.71088  
 H 2.29474 -0.49307 -3.28494  
 N -1.50608 -1.30253 -0.77900  
 H -3.51979 -1.70204 -0.15406  
 C -0.95942 -2.71186 -0.90535  
 H -2.62527 0.09097 -1.95611  
 C 0.20598 -2.85643 -1.87882  
 H 0.52431 -0.42363 -3.21363  
 H 0.40656 -3.93035 -1.97411  
 C -2.11240 -0.85910 -2.08558  
 H -1.78941 -3.35832 -1.21811  
 H -1.34977 -0.73302 -2.84703  
 H -0.06160 -2.52262 -2.88552  
 H -2.82979 -1.61729 -2.41955  
 O 0.37639 2.01765 -0.78238

53

FeO syn QSIII (2/5)  
 Fe -0.00350 0.06293 -0.03978  
 H 0.00741 0.05664 4.44765  
 H 2.12711 -0.12337 3.39495  
 H 2.83526 1.86128 2.30436  
 H 0.17103 1.51977 3.52061  
 C 0.03909 0.43837 3.41963  
 H 1.21551 2.41765 1.82144  
 C 1.24930 -0.21932 2.75371  
 C 2.05568 1.78917 1.53718  
 H 3.70750 -0.15022 1.29009  
 H -0.87679 2.64129 1.89701  
 H 1.05685 -1.28723 2.60891  
 H -2.12264 0.43343 3.45353  
 H 2.44927 2.15404 0.59049  
 N 1.62623 0.35273 1.40132  
 H -2.60852 2.37866 2.19250  
 C -1.31359 0.08772 2.79671  
 C 2.76573 -0.46219 0.82340  
 H 2.59881 -1.50646 1.09409  
 C -1.77508 2.16154 1.51439  
 H -1.69291 -0.99865 2.71556  
 H 3.03604 0.75126 -0.95298  
 N -1.57836 0.67249 1.41847  
 H -2.00004 2.56444 0.52806  
 C 2.85375 -0.29088 -0.68378  
 H 3.68780 -0.88249 -1.07974  
 H -3.60968 0.01240 1.62376  
 O -0.74144 1.54603 -1.41546  
 C -2.83745 0.05114 0.84585  
 H 1.74156 -2.62831 -0.45218  
 N 1.56709 -0.71793 -1.36476  
 H -2.22002 -2.01541 1.09149  
 H -3.20077 0.71492 0.05910  
 H 1.62076 0.96220 -2.67877  
 C -2.57833 -1.34700 0.30625  
 C 1.52105 -2.23439 -1.44743  
 H -0.64170 -3.05697 0.03479  
 H 2.33707 -2.54354 -2.11384  
 C 1.53621 -0.12118 -2.74800  
 H 2.37532 -0.51208 -3.33459  
 N -1.53652 -1.32796 -0.79300  
 H -3.51056 -1.77194 -0.08483  
 O -0.96441 -2.72414 -0.95687  
 H -2.67065 0.08838 -1.92845  
 C 2.20142 -2.83065 -1.94122  
 H 0.06657 -0.37304 -3.25369  
 H 0.38682 -3.90208 -2.08584  
 C -2.17176 -0.86707 -2.07784  
 H -1.78333 -3.37977 -1.28068  
 H -1.42259 -0.74260 -2.85579  
 H -0.06863 -2.45130 -2.93134  
 H -2.90668 -1.61193 -2.40458

O 0.34869 2.06083 -0.77220

53

FeO syn sideon (2/7)  
 Fe -0.00311 0.04526 -0.02935  
 H 0.00745 0.06097 4.45081  
 H 2.13021 -0.10491 3.41454  
 H 2.84747 1.86956 2.30307  
 H 0.16237 1.52448 3.52270  
 C 0.03815 0.44204 3.42248  
 H 1.22544 2.42746 1.83123  
 C 1.25489 -0.20741 2.75917  
 C 2.06280 1.79767 1.54072  
 H 3.71037 -0.14538 1.29018  
 H -0.87039 2.63698 1.88980  
 H 1.06908 -1.27690 2.61689  
 H -2.12421 0.42210 3.45329  
 H 2.45170 2.16274 0.59195  
 N 1.62966 0.36320 1.40589  
 H -2.59731 2.37256 2.20912  
 C -1.31174 0.08238 2.79746  
 C 2.76595 -0.45548 0.82725  
 H 2.59727 -1.49884 1.10098  
 C -1.77328 2.15603 1.51936  
 H -1.38782 -1.00457 2.71474  
 H 3.03593 0.75010 -0.95407  
 N -1.57598 0.66722 1.41883  
 H -2.01315 2.56053 0.53710  
 C 2.85233 -0.29091 -0.68129  
 H 3.68633 -0.88454 -1.07466  
 H -3.60790 0.00722 1.62363  
 O -0.75635 1.57299 -1.39209  
 C -2.83584 0.04773 0.84553  
 H 1.72998 -2.62832 -0.44338  
 N 1.56548 -0.71917 -1.36134  
 H -2.21926 -2.01942 1.08361  
 H -3.19952 0.71389 0.06087  
 H 1.64080 0.95383 -2.68408  
 C -2.57958 -1.34947 0.30045  
 C 1.51845 -2.23597 -1.44136  
 H -0.65726 -3.06721 0.02173  
 H 2.33934 -2.54838 -2.10033  
 C 1.53699 -0.12836 -2.74719  
 H 2.36584 -0.53526 -3.33761  
 N -1.54141 -1.33031 -0.80190  
 H -3.51446 -1.71233 -0.08696  
 C -0.97240 -2.72766 -0.97012  
 H -2.67332 0.09020 -1.93408  
 C 0.20151 -2.83086 -1.94579  
 H 0.06027 -0.36609 -3.24692  
 H 0.38773 -3.90181 -2.09305  
 C -2.17905 -0.86777 -2.08419  
 H -1.78973 -3.38025 -1.30422  
 H -1.43153 -0.74748 -2.86481  
 H -0.06118 -2.44760 -2.93642  
 H -2.91916 -1.60817 -2.41000  
 O 0.36595 2.05286 -0.80894

53

FeO syn unbound (2/7)  
 Fe -0.07242 0.14598 -0.05920  
 H 1.74847 -1.50180 -3.78684  
 H -0.61256 -1.39172 -3.77509  
 H -1.69291 0.80011 -3.74937  
 H 1.38413 0.18559 -3.57196  
 C 1.33808 -0.78368 -3.06533  
 H -0.21887 1.50152 -3.03935  
 C -0.11181 -1.21424 -2.81228  
 C -1.17172 1.02744 -2.81066  
 H -2.91228 -0.90485 -2.58311  
 H 1.80941 1.84530 -2.19430  
 H -0.11963 -2.15895 -2.25801  
 H 3.31259 -0.72047 -2.18886  
 H -1.76701 1.73183 -2.22934  
 N -0.95012 -0.23311 -2.02423  
 H 3.46853 1.61418 -1.59755  
 C 2.27088 -0.82055 -1.84878  
 C -2.27862 -0.86841 -1.68663  
 H -2.08133 -1.89993 -1.38354  
 C 2.40628 1.59261 -1.31867  
 H 2.17970 -1.79504 -1.35999  
 H -3.20715 0.91894 -0.88753  
 N 2.02374 0.23856 -0.79845  
 H 2.22218 2.33856 -0.54469  
 C -2.99843 -0.10726 -0.57804  
 H -3.96612 -0.58474 -0.37292  
 H 3.84639 -0.43294 0.12177  
 O 0.33938 3.62334 0.83356  
 C 2.85538 -0.06951 0.42520  
 H -2.22330 -2.16008 0.76309  
 N -2.17669 -0.04555 0.68832  
 H 2.03741 -2.04417 0.78073  
 H 3.00740 0.86738 0.96477  
 H -2.48633 2.04435 0.92753  
 C 2.18287 -1.10251 1.32290

C -2.36144 -1.33137 1.46381  
H 0.09248 -2.59897 1.55570  
H -3.40475 -1.36635 1.81193  
C -2.62560 1.13092 1.50731  
H -3.68466 1.03184 1.78108  
N 0.82416 -0.63243 1.78566  
H 2.82142 -1.31195 2.19170  
C 0.04276 -1.81407 2.31767  
H 1.54736 1.26405 2.45990  
C -1.42359 -1.52851 2.65979  
H -2.03334 1.20455 2.41856  
H -1.79166 -2.41309 3.19532  
C 0.98177 0.41740 2.84967  
H 0.56027 -2.18847 3.21289  
H 0.00636 0.78139 3.16756  
H -1.51292 -0.70498 3.37559  
H 1.50851 -0.00124 3.71669  
O -0.56625 3.71665 -0.02925

53

FeO anti (2/1)  
Fe -0.04074 -0.34339 -0.09796  
H 1.83125 -1.19482 -3.96813  
H -0.56695 -0.89032 -4.01216  
H -1.88356 1.09622 -3.30453  
H 1.47789 0.44608 -3.51560  
C 1.39644 -0.58729 -3.16446  
H -0.24142 1.58470 -2.85655  
C -0.06526 -1.02279 -3.04499  
C -1.15640 1.12976 -2.48623  
H -2.79802 -0.92097 -2.72355  
H 1.46369 1.79186 -1.86906  
H -0.11451 -2.08432 -2.79626  
H 3.31573 -0.59482 -2.18635  
H -1.54751 1.74946 -1.68070  
N -0.88085 -0.27597 -2.00119  
H 3.14081 1.68697 -1.29984  
C 2.27244 -0.81784 -1.92963  
C -2.19422 -1.00291 -1.81146  
H -1.97724 -2.05951 -1.65596  
C 2.09465 1.49471 -1.03765  
H 2.22387 -1.86396 -1.61630  
H -3.33468 0.57057 -0.87191  
N 1.91308 0.02754 -0.71844  
H 1.82614 2.09280 -0.16625  
C -2.94027 -0.41722 -0.62984  
H -3.79408 -1.04873 -0.36693  
H 3.75202 -0.80536 0.03841  
O -0.62750 -3.36727 -0.43654  
C 2.85846 -0.31261 0.43250  
H -2.19978 -2.33225 1.04639  
N -2.01772 -0.27344 0.58028  
H 2.02470 -2.20786 1.05590  
H 3.18412 0.62274 0.88944  
H -2.06205 1.86651 0.50657  
C 2.17016 -1.20140 1.44837  
C -2.30662 -1.38261 1.57718  
H 0.17920 -2.62590 2.13275  
H -3.35857 -1.28955 1.87583  
C -2.31373 1.07203 1.20988  
H -3.37909 1.13079 1.45711  
N 0.80593 -0.63373 1.78404  
H 2.77329 -1.28018 2.36118  
C 0.05645 -1.65749 2.62076  
H 1.38737 1.43006 1.95641  
C -1.43043 -1.36642 2.83292  
H -1.73534 1.21538 2.11657  
H -1.80884 -2.16556 3.48263  
C 0.97873 0.63639 2.57943  
H 0.55885 -1.71721 3.59467  
H 0.02218 0.96829 2.97312  
H -1.57840 -0.44478 3.40392  
H 1.65637 0.45258 3.42054  
O 0.26856 -2.44695 -0.33739

53

FeO anti (2/3)  
Fe -0.02788 -0.43517 -0.10823  
H 1.83923 -1.17188 -3.97972  
H -0.56366 -0.87501 -4.02306  
H -1.91566 1.11130 -3.26386  
H 1.48039 0.46579 -3.52008  
C 1.39976 -0.56963 -3.17487  
H -0.25056 1.57777 -2.88514  
C -0.05873 -1.01512 -3.05877  
C -1.15426 1.13287 -2.47720  
H -2.77679 -0.97328 -2.71766  
H 1.47368 1.80797 -1.87062  
H -0.10200 -2.07305 -2.79951  
H 3.31487 -0.59162 -2.18953  
H -1.50310 1.75488 -1.65433  
N -0.87437 -0.27571 -2.01416  
H 3.14966 1.69952 -1.29482  
C 2.26935 -0.80887 -1.93850  
C -2.17681 -1.02288 -1.80135

H -1.93261 -2.06812 -1.61027  
C 2.10200 1.50976 -1.03788  
H 2.20537 -1.85262 -1.62200  
H -3.31260 0.58119 -0.90437  
N 1.92183 0.04288 -0.72560  
H 1.83045 2.10456 -0.16552  
C -2.93282 -0.40714 -0.64280  
H -3.79496 -1.02539 -0.37681  
H 3.75445 -0.80205 0.02865  
O -0.50556 -3.43772 0.01039  
C 2.86087 -0.31548 0.42940  
H -2.20548 -2.31661 1.03293  
N -2.02545 -0.25234 0.58026  
H 2.01545 -2.21971 1.01923  
H 3.18334 0.61447 0.89848  
H -2.06797 1.88869 0.51969  
C 2.17218 -1.22285 1.42935  
C -2.30993 -1.37087 1.57065  
H 0.14707 -2.64034 2.08406  
H -3.36083 -1.27117 1.86956  
C -2.33488 1.08916 1.21112  
H -3.40572 1.14122 1.43303  
N 0.80793 -0.65570 1.77912  
H 2.77211 -1.31280 2.34252  
C 0.04968 -1.68368 2.59948  
H 1.37366 1.41614 1.93418  
C -1.43108 -1.36941 2.82394  
H -1.77799 1.22475 2.13245  
H -1.81707 -2.16959 3.46768  
C 0.97150 0.62331 2.56195  
H 0.55856 -1.76299 3.56828  
H 0.01376 0.94793 2.95705  
H -1.56610 -0.45119 3.40321  
H 1.65381 0.44612 3.40013  
O 0.14252 -2.33030 -0.43921

53

FeO anti QI (2/5)  
Fe -0.03244 -0.35893 -0.10125  
H 1.84022 -1.23307 -3.94312  
H -0.56600 -0.92984 -3.99620  
H -1.90400 1.08027 -3.26811  
H 1.47589 0.41565 -3.53044  
C 1.39854 -0.60969 -3.15573  
H -0.23486 1.54279 -2.90021  
C -0.06015 -1.05378 -3.03026  
C -1.14166 1.11383 -2.48320  
H -2.78054 -0.98034 -2.69398  
H 1.49620 2.18163 -1.90930  
H -0.10612 -2.10946 -2.76149  
H 3.31411 -0.59449 -2.17186  
H -1.48591 1.75332 -1.67114  
N -0.87162 -0.29433 -1.99602  
H 3.16798 1.70312 -1.32384  
C 2.27021 -0.81040 -1.91360  
C -2.18621 -1.01768 -1.77364  
H -1.96325 -2.06272 -1.55526  
C 2.11736 1.53041 -1.06662  
H 2.21176 -1.84575 -1.57016  
H -3.28429 0.62884 -0.90733  
N 1.92034 0.07256 -0.72135  
H 1.84949 2.14758 -0.20877  
C -2.93286 -0.36623 -0.62901  
H -3.81303 -0.95741 -0.35969  
H 3.76959 -0.72242 0.04769  
O -0.68266 -3.43930 -0.38145  
C 2.85628 -0.26704 0.44104  
H -2.17434 -2.29828 0.99133  
N -2.02439 -0.22416 0.59308  
H 2.02770 -2.19213 0.98461  
H 3.14378 0.66734 0.92376  
H -2.09550 1.91497 0.56343  
C 2.17496 -1.20300 1.41832  
C -2.29802 -1.37069 1.55582  
H 0.17178 -2.64405 2.07827  
H -3.35122 -1.29244 1.85314  
C -2.34538 1.10228 1.24624  
H -3.41496 1.13829 1.47893  
N 0.80547 -0.65198 1.77326  
H 2.77226 -1.31137 2.33114  
C 0.05691 -1.68890 2.59151  
H 1.33325 1.43150 1.95255  
C -1.42633 -1.38804 2.81331  
H -1.78160 1.23256 2.16427  
H -1.81130 -2.20068 3.44191  
C 0.96134 0.61850 2.57367  
H 0.56528 -1.76503 3.56085  
H 0.00549 0.91612 2.99380  
H -1.56799 -0.48041 3.40771  
H 1.66416 0.44138 3.39463  
O 0.24488 -2.47357 -0.36390

53

FeO anti sideon (2/5)  
Fe -0.02586 -0.57337 -0.12092  
H 1.83798 -0.96763 -4.06145  
H -0.54365 -0.88987 -4.08420  
H -1.81985 1.08035 -3.42276  
H 1.37345 0.60440 -3.48960  
C 1.38077 -0.45287 -3.20675  
H -0.29755 1.63917 -2.70108  
C -0.05307 -1.00185 -3.10838  
C -1.22001 1.09859 -2.50563  
H -2.85856 -0.96339 -2.74181  
H 1.50718 1.85959 -1.72885  
H -0.03585 -2.06663 -2.86683  
H 3.33872 -0.35592 -2.31755  
H -1.76840 1.63027 -1.73171  
N -0.92415 -0.31178 -2.07290  
H 3.18025 1.75415 -1.14538  
C 2.33571 -0.69413 -2.02480  
C -2.22217 -1.05980 -1.85307  
H -1.98347 -2.11650 -1.72858  
C 2.13679 1.51364 -0.91327  
H 2.39904 -1.75883 -1.79945  
H -3.46971 0.42854 -0.88609  
N 1.98565 0.02528 -0.72754  
H 1.83899 2.03580 -0.00456  
C -2.97992 -0.51343 -0.63480  
H -3.76898 -1.21998 -0.36225  
H 3.73219 -1.00996 -0.00899  
H -0.56334 -2.67129 -0.05894  
C 2.90463 -0.43047 0.40973  
H -2.35564 -2.26908 1.21398  
H -2.09262 -0.25781 0.58737  
H 0.03253 -2.29665 1.12475  
H 3.33818 0.46392 0.85977  
H -2.09563 1.87138 0.35367  
H 1.83899 2.03580 -0.00456  
C -2.36974 1.13236 1.10654  
H -3.43448 1.23179 1.34461

53

FeO anti QII (2/5)  
Fe -0.03796 -0.38157 -0.10614

H 1.84157 -1.19092 -3.96581  
H -0.54123 -0.95361 -4.06659  
H -1.90092 1.06765 -3.41899  
H 1.45391 0.44240 -3.50480  
C 1.38867 -0.59127 -3.16599  
H -0.27227 1.56688 -2.92177  
C -0.07412 -1.05407 -3.07802  
C -1.19623 1.10618 -2.58050  
H -2.86204 -0.97444 -2.70845  
H 1.56302 1.84077 -1.90020  
H -0.11608 -2.10807 -2.79901  
H 3.32442 -0.61013 -2.21945  
H -1.61341 1.72425 -1.78538  
N -0.92546 -0.28878 -2.08362  
H 3.24720 1.70324 -1.35015  
C 2.28256 -0.80276 -1.93249  
C -2.22548 -1.01438 -1.81559  
H -1.99363 -2.06204 -1.61922  
C -1.99463 1.54024 -1.07209  
H 2.21515 -1.83719 -1.58677  
H -3.35041 0.59802 -0.90507  
N 1.98014 0.08864 -0.73220  
H 1.95466 2.15541 -0.20567  
C -2.96988 -0.38850 -0.63738  
H -3.83488 -1.00870 -0.38108  
H 3.78858 -0.76885 0.05886  
O -0.64867 -3.39785 -0.43855  
C 2.88465 -0.28380 0.44113  
H -2.16039 -2.30126 1.00531  
N -2.08914 -0.22020 0.59884  
H 2.03628 -2.19731 1.03058  
H 3.19754 0.64497 0.91958  
H -2.21861 1.90924 0.54373  
C 2.20208 -1.20544 1.45237  
C -2.30446 -1.37520 1.56843  
H 0.18833 -2.64290 2.13928  
H -3.35695 -1.33715 1.87902  
C -2.42164 1.09975 1.24565  
H -3.48106 1.11751 1.52546  
N 0.85303 -0.65360 1.86845  
H 2.84490 -1.31429 2.33490  
C 0.06979 -1.68703 2.65225  
H 1.46151 1.39420 2.07920  
C -1.42248 -1.36573 2.82781  
H -1.81792 1.25608 2.13603  
H -1.82344 -2.15573 3.47543  
H 1.03437 0.59684 2.68622  
H 0.53476 -1.78255 3.64236  
H 0.07407 0.93673 3.06704  
H -1.56258 -0.44057 3.39539  
H 1.69815 0.39047 3.53373  
O 0.18099 -2.35352 -0.32010

53

FeO anti sideon (2/5)  
Fe -0.02586 -0.57337 -0.12092  
H 1.83798 -0.96763 -4.06145  
H -0.54365 -0.88987 -4.08420  
H -1.81985 1.08035 -3.42276  
H 1.37345 0.60440 -3.48960  
C 1.38077 -0.45287 -3.20675  
H -0.29755 1.63917 -2.70108  
C -0.05307 -1.00185 -3.10838  
C -1.22001 1.09859 -2.50563  
H -2.85856 -0.96339 -2.74181  
H 1.50718 1.85959 -1.72885  
H -0.03585 -2.06663 -2.86683  
H 3.33872 -0.35592 -2.31755  
H -1.76840 1.63027 -1.73171  
N -0.92415 -0.31178 -2.07290  
H 3.18025 1.75415 -1.14538  
C 2.33571 -0.69413 -2.02480  
C -2.22217 -1.05980 -1.85307  
H -1.98347 -2.11650 -1.72858  
C 2.13679 1.51364 -0.91327  
H 2.39904 -1.75883 -1.79945  
H -3.46971 0.42854 -0.88609  
N 1.98565 0.02528 -0.72754  
H 1.83899 2.03580 -0.00456  
C -2.97992 -0.51343 -0.63480  
H -3.76898 -1.21998 -0.36225  
H 3.73219 -1.00996 -0.00899  
H -0.56334 -2.67129 -0.05894  
C 2.90463 -0.43047 0.40973  
H -2.35564 -2.26908 1.21398  
H -2.09262 -0.25781 0.58737  
H 0.03253 -2.29665 1.12475  
H 3.33818 0.46392 0.85977  
H -2.09563 1.87138 0.35367  
H 1.83899 2.03580 -0.00456  
C -2.36974 1.13236 1.10654  
H -3.43448 1.23179 1.34461

N 0.84773 -0.69130 1.84259  
H 2.82977 -1.33193 2.37202  
C 0.03570 -1.65641 2.68899  
H 1.57103 1.32454 1.95444  
C -1.43306 -1.24828 2.89536  
H -1.79082 1.32654 2.00619  
H -1.84575 -1.97636 3.60538  
C 1.03462 0.60960 2.57375  
H 0.52516 -1.73297 3.66855  
H 0.07242 1.03975 2.83660  
H -1.50032 -0.28604 3.41191  
H 1.60759 0.43165 3.49101  
O 0.65814 -2.59675 -0.66088

53

FeO anti sideon (2/7)  
Fe -0.03059 -0.49334 -0.12362  
H 1.83690 -0.95656 -4.05791  
H -0.53986 -0.89858 -4.08718  
H -1.83066 1.05201 -3.45812  
H 1.36416 0.61062 -3.47910  
C 1.37740 -0.44787 -3.20064  
H -0.32425 1.63634 -2.71998  
C -0.05512 -1.00445 -3.10762  
C -1.24379 1.08671 -2.53306  
H -2.86766 -0.98255 -2.73956  
H 1.55760 1.88160 -1.72432  
H -0.03390 -2.06886 -2.86540  
H 3.34109 -0.35722 -2.32388  
H -1.80894 1.61989 -1.77120  
N -0.93581 -0.31511 -2.08031  
C 3.22901 1.74717 -1.13896  
C 2.33803 -0.68742 -2.02156  
C -2.22735 -1.06993 -1.85242  
H -1.98357 -2.12492 -1.72458  
C 2.18128 1.52389 -0.90817  
H 2.39879 -1.75185 -1.79360  
H -3.48063 0.41676 -0.89145  
N 2.00136 0.03769 -0.72422  
H 1.89039 2.04814 0.00186  
C -2.98729 -0.52208 -0.63486  
H -3.77506 -1.23008 -0.36160  
H 3.73647 -1.01872 -0.00832  
O -0.55363 -2.65466 -0.05072  
C 2.91152 -0.43559 0.41118  
H -2.35664 -2.26914 1.21822  
N -2.10330 -0.25734 0.58715  
H 0.02256 -2.29990 1.11261  
H 3.35184 0.45079 0.87062  
H -2.15079 1.86937 0.35046  
C 2.19367 -1.28442 1.47145  
C -2.37791 -1.28154 1.67978  
H 0.08474 -2.63315 2.20809  
H -3.40251 -1.10570 2.03513  
C -2.40109 1.12681 1.10886  
H -3.46382 2.20963 1.36234  
N 0.85079 -0.68832 1.84140  
H 2.82651 -1.35172 3.26551  
C 0.03392 -1.65196 2.68440  
H 1.60741 1.31414 1.98711  
C -1.43299 -1.23873 2.89282  
H -1.81074 1.33420 1.99887  
H -1.84525 -1.95835 3.61171  
C 1.05956 0.59800 2.59573  
H 0.52306 -1.73416 3.66394  
H 0.10312 1.03979 2.86290  
H -1.49559 -2.07101 3.39995  
H 1.62864 0.39627 3.51043  
O 0.63524 -2.55464 -0.67044

67

FeO+CHD syn React (2/1)  
Fe 6.21567 4.01914 4.90597  
H 2.35603 4.01799 2.81916  
H 2.55630 5.49051 4.69290  
H 4.03195 7.39090 4.50002  
H 3.57129 5.18710 2.38527  
C 3.37687 4.34361 3.05438  
H 5.02513 6.58958 3.26875  
C 3.36785 4.77219 4.51836  
C 4.89150 6.73095 4.37076  
H 3.85586 6.55767 6.66074  
H 5.68592 5.38194 1.94536  
H 3.18023 3.89943 5.15230  
H 4.12990 2.81580 1.72337  
H 5.78649 7.20184 4.73828  
N 4.65307 5.41447 5.02402  
H 5.95052 4.01374 0.84947  
C 4.29259 3.51888 2.75300  
C 4.47023 5.66302 6.50934  
H 3.92297 4.81492 6.92508  
C 6.19701 4.43086 1.83264  
H 4.04754 2.33022 3.42247  
H 6.35039 6.68821 6.77205  
N 5.77677 3.45421 2.90376



|                             |                              |                              |                               |
|-----------------------------|------------------------------|------------------------------|-------------------------------|
| H 7.94235 7.27979 6.51111   | C 3.97590 6.02003 6.08605    | H 7.00061 4.03445 8.65696    | C 13.40664 6.98236 5.01572    |
| C 9.52194 8.68754 6.70399   | H 3.14345 4.08501 7.55975    | C 7.70196 2.83324 3.05082    | C 12.52122 7.57742 5.82823    |
| C 10.11828 7.97223 7.78657  | H 5.10821 6.82037 3.59653    | C 5.91092 1.29870 6.95228    | H 12.00263 7.37892 7.90803    |
| C 11.11624 7.05555 7.57218  | H 3.38998 2.97145 4.69418    | H 6.33945 1.00718 4.25307    | H 11.72151 4.83782 7.85994    |
| C 11.64406 6.75574 6.19403  | H 4.65171 4.61273 1.59453    | H 5.73341 0.73018 7.87999    | H 13.32143 3.75972 6.38827    |
| C 10.98249 7.55965 5.10601  | H 4.74269 6.41292 6.75190    | C 6.98835 2.97729 8.39490    | H 14.89004 5.44399 5.27100    |
| C 9.98708 8.46578 5.73244   | N 4.24008 4.56782 5.77738    | H 6.73058 2.38652 9.28650    | H 13.60919 5.01176 4.17281    |
| H 8.77952 9.45447 6.90104   | H 5.86593 6.61939 2.00388    | N 7.75779 2.53965 4.52426    | H 13.88655 7.55460 4.22382    |
| H 9.77232 8.16660 8.79791   | C 4.69947 4.28325 2.64057    | H 8.55274 2.36046 2.53749    | H 12.28470 8.63145 5.69357    |
| H 11.56140 6.52177 8.40695  | C 4.05400 3.75863 7.04318    | C 7.30049 1.12543 4.76556    |                               |
| H 12.73965 6.91443 6.16683  | H 3.91188 2.71514 6.75603    | H 9.47555 3.75923 4.84711    | 67                            |
| H 11.54516 5.67385 5.97846  | C 5.94796 6.37766 3.07003    | C 7.13769 0.72176 6.23590    | FeOO+CHD syn QIII React (2/5) |
| H 11.32823 7.40604 4.08771  | H 4.81350 3.19619 2.64141    | H 7.98378 2.69370 8.05687    | Fe 6.87471 4.05912 5.27597    |
| H 9.54309 9.03385 4.55969   | H 5.39800 4.96830 8.22625    | H 7.01380 -0.36922 6.24317   | H 3.13025 4.54345 2.81067     |
| 67                          | N 5.96104 4.87997 3.23905    | C 9.15554 2.73339 5.02691    | H 2.79857 4.32107 5.13292     |
| FeOO+CHD syn QI React (2/5) | H 6.86993 6.78571 3.47752    | H 8.01708 0.44202 4.28163    | H 3.53215 6.17705 6.47422     |
| Fe 6.09894 4.12663 5.26110  | C 5.26324 3.92583 7.93304    | H 9.19662 2.55911 6.10020    | H 4.01231 5.87901 3.49272     |
| H 2.55347 4.25800 2.62787   | H 5.15995 3.33422 8.85005    | H 8.05411 0.90951 6.80487    | C 4.01743 4.78788 3.40867     |
| H 2.11409 4.08791 4.98799   | H 6.94219 4.36908 1.99823    | H 8.84317 2.04029 4.52058    | H 4.81918 6.63087 5.32831     |
| H 2.75536 5.86767 6.56523   | O 7.32218 5.83376 5.58544    | O 7.20894 6.19298 7.15873    | C 3.81661 4.11791 4.77137     |
| H 3.15014 5.71669 3.36329   | C 7.16041 4.35396 2.77236    | H 7.66246 6.02219 8.01470    | C 4.57667 6.00635 6.61895     |
| C 3.33638 4.64134 3.29363   | H 5.66092 1.59761 6.77444    | C 10.04106 9.84519 6.78525   | H 3.65064 4.09248 7.61697     |
| H 3.79664 6.47147 5.26531   | N 6.51778 3.49576 7.19535    | C 11.36006 10.02755 6.30206  | H 6.06540 6.73491 3.48310     |
| C 3.14247 3.94020 4.63459   | H 6.67971 2.26420 2.75027    | C 12.00986 8.97287 5.70556   | H 3.92015 3.03300 4.66519     |
| C 3.76232 5.82397 6.13642   | H 7.98801 5.04226 2.65020    | C 11.35298 7.66050 5.56421   | H 5.15251 4.66724 1.57337     |
| H 2.88501 3.75148 7.41466   | H 7.60616 5.15521 7.96097    | C 9.82533 7.53592 6.09081    | H 5.23070 6.29501 7.00901     |
| H 4.99836 6.82343 3.75011   | C 7.50327 2.95709 2.93333    | C 9.35771 8.61487 6.68236    | N 4.78416 4.55080 5.85302     |
| H 3.30416 2.86507 4.51217   | C 6.59247 1.97942 7.19949    | H 9.53831 10.68567 7.25323   | H 6.73381 6.40538 1.86919     |
| H 4.65573 4.74915 1.58993   | H 7.63292 1.14072 4.56875    | H 11.84040 10.99195 6.40638  | C 5.52229 4.29238 2.60943     |
| H 4.49004 6.18583 6.86056   | H 6.63462 1.66397 8.25001    | H 13.01958 9.08208 5.32460   | C 4.54049 3.72156 7.02491     |
| N 4.06998 4.39904 5.74497   | C 7.69228 4.07110 7.94541    | H 11.36829 7.35118 4.49902   | H 4.32523 2.70053 6.76995     |
| H 5.80907 6.72796 2.17481   | H 7.68803 3.67884 8.96949    | H 11.99433 6.87291 6.00927   | C 6.80905 6.15637 2.93564     |
| C 4.66781 4.34230 2.60866   | N 7.77778 2.96651 4.42151    | H 9.46217 6.57963 6.00580    | H 5.18791 3.20094 2.55772     |
| C 3.84002 3.49489 6.94273   | H 8.38069 2.57597 2.39669    | H 8.35073 8.51037 7.06414    | H 5.96543 4.78125 8.33317     |
| C 3.76277 2.46941 6.57640   | C 7.68803 1.54066 4.92298    |                              | N 6.58053 4.68681 3.14393     |
| C 5.86242 6.42617 3.22674   | H 9.20762 4.56394 4.35649    | 67                           | H 7.79946 6.42776 3.29942     |
| H 4.80586 3.26074 2.53317   | C 7.77382 1.38236 6.43804    | FeOO+CHD syn QII React (2/5) | C 5.74392 3.29543 8.02371     |
| H 5.03969 4.67123 8.30043   | H 8.62744 3.79792 7.46710    | Fe 6.72910 4.04544 5.25633   | H 5.52886 3.18198 8.93407     |
| N 5.89582 4.91879 3.29809   | H 7.76276 0.30424 6.64122    | H 2.96410 4.38667 2.77294    | H 7.43111 3.90256 1.33433     |
| H 6.76561 6.82778 6.77781   | C 3.15914 3.52047 4.66132    | H 2.66796 4.28087 5.11008    | O 8.47131 5.24663 5.51091     |
| C 4.98164 3.65155 7.91706   | H 8.49078 0.96568 4.4194     | H 3.42329 6.24421 6.28893    | C 7.65095 3.91375 2.40122     |
| H 4.86006 2.98241 8.77591   | H 9.40942 3.46497 5.71638    | H 3.84089 5.76331 3.37344    | H 5.90491 1.40999 7.02875     |
| H 6.94792 4.49705 1.47341   | H 8.73037 1.73878 6.83117    | C 3.85593 4.66975 3.34599    | N 6.98025 3.20740 7.35184     |
| O 7.15236 5.86976 5.75900   | H 9.88887 2.93196 4.09294    | H 4.73325 6.60870 5.13685    | N 6.82338 1.94560 2.79425     |
| C 7.13833 4.45756 2.55148   | O 7.04214 6.84382 6.53423    | C 3.67996 4.06648 4.74137    | H 8.59251 4.45079 2.54387     |
| H 5.59603 1.40573 6.68968   | H 8.27726 7.58525 6.1002     | O 4.68666 6.04459 6.02845    | H 8.22404 4.75859 8.11223     |
| N 6.29890 3.34377 7.22272   | C 9.32264 8.22239 6.59214    | H 3.52723 4.25624 7.58960    | C 7.76294 2.48578 2.92806     |
| H 6.71842 2.34489 2.74597   | C 10.12087 7.76281 7.74597   | H 5.90619 6.62333 3.28376    | C 6.90713 1.69440 7.35878     |
| H 7.93760 5.16741 2.76850   | C 11.22666 6.99599 7.59648   | H 3.79283 2.97890 4.69177    | H 6.66992 0.94251 4.73087     |
| H 7.21308 5.01449 8.18610   | C 11.75947 6.59788 6.25014   | H 4.98768 4.48099 1.51394    | H 7.01501 1.36319 8.40166     |
| C 7.50823 3.06003 2.98402   | C 11.01444 7.20333 5.09610   | H 5.11597 6.37279 6.84178    | C 8.18858 3.66915 8.11421     |
| C 6.48189 1.83232 7.16683   | C 9.90834 7.97012 5.26304    | N 4.65646 4.56408 5.79143    | H 8.14225 3.30939 9.15037     |
| H 6.79218 1.13704 4.51044   | H 8.88867 9.22361 6.71200    | H 6.60615 6.18673 1.70909    | N 8.09970 2.46329 4.40186     |
| H 6.50533 1.48016 8.20518   | H 9.78122 8.04461 8.73866    | C 5.05363 4.14022 2.55613    | H 8.53466 1.94416 2.36672     |
| H 7.40312 3.95269 8.05281   | H 11.78423 6.66259 6.46748   | C 4.39634 3.81784 7.08524    | C 7.72376 1.11234 4.97532     |
| H 7.42198 3.45992 9.03111   | H 12.83029 6.85742 6.17984   | H 4.13944 2.78854 6.82735    | H 9.85686 3.63286 4.06488     |
| N 7.71753 3.03311 4.48599   | H 11.75951 5.49567 6.15831   | C 6.65900 6.01056 2.78988    | C 7.93419 0.97003 6.48530     |
| H 8.42289 2.72424 2.48216   | H 11.41429 7.02835 4.10091   | H 5.01712 3.04845 2.54744    | H 9.09806 3.29038 7.65063     |
| C 7.70138 1.58153 4.92611   | H 9.41295 8.40827 4.40121    | H 8.60405 4.89881 8.26145    | H 7.09316 -0.09834 6.71346    |
| H 9.02195 4.74018 4.60485   | 67                           | N 6.41771 4.55109 3.07785    | C 9.57231 2.71661 4.57902     |
| C 7.73442 1.35845 4.63474   | FeOO+CHD syn QI Interm (2/5) | H 6.64427 6.29550 3.15607    | H 8.31537 0.35070 4.44817     |
| H 8.36778 3.82371 7.57261   | Fe 6.44578 4.08534 5.48827   | C 5.60959 3.86905 7.99889    | H 9.81813 2.83358 5.63160     |
| H 7.79122 0.27360 6.58649   | H 5.40148 3.33265 8.93258    | H 5.40148 3.33265 8.93258    | H 9.85856 1.22563 6.77356     |
| C 9.04452 3.67295 4.81587   | H 3.21198 5.14545 2.38865    | H 2.26486 3.68655 1.30760    | H 10.14140 1.87568 4.16430    |
| H 8.56180 1.08767 4.45677   | H 2.43122 4.56219 4.52850    | O 8.35713 5.18384 5.34887    | O 8.41294 6.48293 5.99119     |
| H 9.27535 3.53852 5.86820   | H 3.00424 6.09040 6.50503    | C 7.48663 3.73800 2.38084    | H 10.16983 7.02381 6.32568    |
| H 8.64500 1.75935 6.88893   | H 3.98888 6.28428 3.45282    | H 5.71523 1.47019 7.08716    | C 11.28417 7.04669 6.50160    |
| H 9.82976 3.19413 4.22101   | C 3.97571 5.22576 3.17349    | N 6.82668 3.26045 7.32870    | C 11.66556 5.79516 7.22454    |
| O 6.75197 6.72831 6.70665   | H 4.48806 6.61212 5.50920    | H 6.63450 1.79895 2.84736    | C 12.48417 4.86204 6.69426    |
| H 8.80725 8.44252 6.49422   | C 3.49419 4.34904 4.33294    | H 8.43143 4.27325 2.49318    | C 13.11959 5.00550 5.33965    |
| C 9.88599 8.62418 6.35871   | C 4.07092 5.87539 6.19353    | H 8.11123 4.82149 8.00970    | C 12.79067 6.30140 4.65188    |
| C 10.64061 8.14855 7.57810  | H 2.71959 3.81908 6.98201    | C 7.57847 2.33560 2.95807    | C 11.97131 7.23001 5.18619    |
| C 11.62967 7.24397 7.53351  | H 5.95908 7.02313 3.88667    | C 6.72281 1.74690 7.40573    | H 11.39730 7.93460 7.14479    |
| C 12.11065 6.59422 6.25683  | H 3.56820 3.29603 4.40112    | H 6.47343 0.87957 4.82049    | H 11.24745 5.65052 8.21761    |
| C 11.34904 7.06109 5.03786  | H 5.43554 5.33474 1.58074    | H 8.82327 1.47193 8.46406    | H 12.72985 3.96715 7.26075    |
| C 10.35890 7.96568 5.08378  | H 4.60831 5.96361 7.13665    | C 8.05950 3.73422 8.05180    | H 14.21497 4.89904 5.42999    |
| H 9.97379 9.72046 6.26778   | N 4.24708 4.49451 5.63375    | H 8.01731 3.41379 9.09944    | H 12.83053 4.15460 6.49683    |
| H 10.34424 8.58115 8.53210  | H 7.06881 6.91108 2.50243    | N 7.91606 2.37381 4.43313    | H 13.26424 6.48094 3.68989    |
| H 12.13345 6.94465 8.45085  | C 5.30144 4.80000 2.53555    | H 8.34687 1.76112 2.42695    | H 11.77866 8.15772 4.65318    |
| H 13.18853 6.78787 6.12102  | C 3.69630 3.48279 6.60455    | H 7.52803 1.04970 5.05947    |                               |
| H 12.04080 5.49678 6.34504  | H 3.52567 2.55587 6.05161    | H 9.67934 3.52925 4.06381    | 67                            |
| H 11.64642 6.62966 4.08367  | C 6.82172 6.48910 3.48819    | C 7.73730 0.96426 6.57186    | FeOO+CHD syn QIII React (2/5) |
| H 9.85550 8.26516 4.16605   | H 5.24965 3.73248 2.30211    | H 8.95439 3.19390 7.59241    | Fe 6.95435 4.06007 5.27649    |
| 67                          | H 4.79887 4.16334 8.33634    | H 7.60624 -0.09036 6.84392   | H 3.19833 4.65502 2.83094     |
| FeOO+CHD syn QI TS (2/5)    | N 6.52313 5.02763 3.38123    | C 9.39191 2.62735 4.59967    | H 2.88154 4.42054 5.15035     |
| Fe 6.28681 4.26460 5.23961  | H 7.65712 6.62343 4.7419     | H 8.11566 0.26738 4.56045    | H 3.66981 6.26878 6.47646     |
| H 2.58437 4.24267 2.74914   | C 4.64097 3.23975 7.77417    | H 9.64339 2.76544 5.64773    | H 4.12539 5.96046 3.51201     |
| H 2.24315 4.24777 5.13291   | H 4.19038 2.51118 8.46542    | H 8.76660 1.20598 6.85301    | C 4.09847 4.87008 3.42089     |
| H 2.98907 6.11694 6.55380   | H 7.72407 4.49918 1.67950    | H 9.95020 1.77163 4.20305    | H 4.97653 6.68228 5.33694     |
| C 3.23810 5.73705 3.35609   | O 7.91793 5.17725 2.24620    | O 8.29182 6.39257 5.94213    | C 3.89332 4.19790 4.78198     |
| C 3.40141 4.65548 3.35379   | C 7.70589 4.33191 2.76754    | H 10.71539 6.94814 6.81229   | C 4.70991 6.06524 6.19283     |
| C 3.98682 6.60766 5.17324   | H 5.03483 1.15352 6.31379    | C 11.80625 6.86419 6.95183   | H 3.73531 4.18629 7.63047     |
| C 3.25438 4.05603 4.74952   | N 5.98583 2.76037 7.30735    | C 12.19630 5.40883 7.06368   | H 6.20680 6.74960 3.48439     |
|                             | H 6.79239 2.37258 2.65685    | C 13.08152 4.81261 6.25091   | H 3.97340 3.11151 4.67040     |
|                             | H 8.60598 4.79574 3.17855    | C 13.79880 5.52760 5.12942   | H 5.21438 4.73644 1.57512     |





H 9.35405 4.27972 4.45665  
C 7.67801 1.17020 6.52816  
H 8.36481 3.57845 7.83185  
H 7.71066 0.08639 6.69606  
C 9.19262 3.28829 4.87596  
H 8.40816 0.76306 4.53276  
H 9.33159 3.34768 5.95282  
H 8.61094 1.55207 6.95374  
H 9.93236 2.59462 4.45880  
O 6.50961 6.04921 6.25287  
H 8.36491 8.54005 6.13357  
C 9.44120 8.76163 6.04105  
C 10.17730 8.24389 7.25461  
C 11.20278 7.38200 7.18864  
C 11.74611 6.82750 5.89227  
C 10.99881 7.33126 4.67954  
C 9.97194 8.19259 4.74627  
H 9.49300 9.86358 6.01402  
H 9.83734 8.60941 8.22198  
H 11.69264 7.05030 8.10238  
H 12.81787 7.07380 5.79992  
H 11.72226 5.72487 5.91635  
H 11.33858 6.96564 3.71213  
H 9.48118 8.52304 3.83241

67

FeO+CHD syn TS sideon (2/7)  
Fe 6.66713 3.95702 5.25958  
H 2.82222 5.06411 3.09766  
H 2.65837 4.83115 5.43922  
H 3.75605 6.50500 6.70751  
H 9.96525 6.22168 3.71599  
C 3.78367 5.14673 3.61989  
H 5.03644 6.79410 5.05072  
H 8.59613 4.48241 4.98503  
C 4.74749 6.18749 6.36089  
H 3.66732 4.41251 7.83271  
H 6.10302 6.72483 3.51331  
H 3.51918 3.39782 4.85542  
H 4.74633 4.88992 1.70039  
H 5.47676 6.34483 7.15325  
N 4.70831 4.73154 5.98379  
H 6.67773 6.29486 1.88972  
C 4.82019 4.47688 2.71613  
C 4.42880 3.90932 7.22372  
H 4.00724 2.95558 6.90072  
C 6.72996 6.03254 2.95361  
H 4.59487 3.40970 5.65184  
H 6.13644 4.65473 8.32614  
N 6.26066 4.61869 3.15865  
H 7.75908 6.11252 3.30088  
C 5.69125 3.69891 8.04290  
H 5.45278 3.15724 8.96767  
H 6.83836 3.76897 1.27608  
O 8.45113 4.77104 5.32580  
H 7.13422 3.70212 2.33092  
H 5.31111 1.38390 6.96558  
N 6.73316 2.93239 7.26087  
H 6.01218 1.89533 2.74144  
H 8.15863 4.07218 2.40716  
H 8.31836 4.17556 7.93444  
H 7.03877 2.26173 2.80653  
C 6.36611 1.46478 7.23877  
H 5.84014 0.86025 4.62594  
H 6.46872 1.08561 8.26509  
C 8.06517 3.11714 7.93626  
H 8.00965 2.74571 8.96729  
N 7.48315 2.12892 4.24311  
H 7.65611 1.61613 2.16887  
C 6.92043 0.84073 4.80253  
H 9.37923 3.01230 3.81307  
C 7.19043 0.59689 6.28734  
H 8.83964 2.56757 7.40509  
H 6.90269 -0.44254 6.48939  
C 8.98426 2.12835 4.31142  
H 7.34060 0.01364 4.21253  
H 9.31835 2.15098 5.34546  
H 8.25932 0.64858 6.51632  
H 9.37500 1.22792 3.82116  
O 7.74732 5.67955 6.23995  
H 8.00833 7.00652 8.83899  
H 8.36487 8.20003 5.65121  
C 8.53951 8.71287 7.01703  
C 9.77117 8.87371 7.56744  
C 11.03123 8.60290 6.80352  
C 10.81715 8.25727 5.36181  
C 9.57632 8.10065 4.82856  
H 7.47340 8.56315 5.12887  
H 7.64749 8.93224 7.59597  
H 9.87415 9.23196 8.58748  
H 11.71231 9.46859 6.88355  
H 11.60194 7.79411 7.29997  
H 11.69945 8.15970 4.73615  
H 9.46332 7.87802 3.77193

67

FeO+CHD syn Inter sideon (2/7)  
Fe 6.44290 3.94181 5.22009  
H 2.57972 4.57319 2.96535  
H 2.39300 4.40844 5.31543  
H 3.33523 6.20754 6.62079  
H 3.55421 5.87989 3.57330  
C 3.51094 4.78881 3.50424  
H 4.52651 6.58945 5.35411  
C 3.36658 4.14107 4.88295  
C 4.33822 5.98517 6.23882  
H 3.36557 4.14067 7.72341  
H 5.60825 6.64299 3.46827  
H 3.39817 3.05159 4.78088  
H 4.53697 4.60203 1.61020  
H 5.08706 6.24241 6.98524  
N 4.42962 4.51786 5.90012  
H 6.21092 6.29411 1.83286  
C 4.64437 4.23215 2.63934  
C 4.19671 3.70403 7.15680  
H 3.89090 2.70183 6.85028  
C 6.31382 6.04317 2.89579  
H 4.56345 3.14280 2.60730  
H 5.75803 4.66238 8.31122  
N 6.04320 4.57737 3.10294  
H 7.32277 6.27210 3.23520  
C 5.44790 3.65801 8.01569  
H 5.25234 3.09052 8.93458  
H 6.77096 3.78504 1.24541  
O 7.85462 5.16670 4.44975  
C 7.05297 3.78252 2.30594  
H 5.41579 1.30083 6.94106  
N 6.60129 3.03122 7.26584  
H 6.19933 1.83126 2.70929  
H 8.01303 4.29605 2.38743  
H 7.99059 4.49006 7.95420  
C 7.15298 2.35278 2.81145  
C 6.43927 1.52619 7.42989  
H 6.11287 0.80026 4.61218  
H 6.55761 1.17214 8.28341  
C 7.88171 3.40701 7.96214  
H 7.85843 3.04121 8.99625  
N 7.54137 2.31658 4.27465  
H 7.89616 1.79788 2.22623  
H 7.17218 0.95780 4.83807  
H 9.27300 3.53724 3.96809  
C 7.41097 0.77433 6.33774  
H 8.73479 2.96252 7.45391  
H 7.26103 -0.29333 6.54202  
C 9.02007 2.57429 4.49057  
H 7.74792 0.20633 4.28077  
H 9.30832 2.59600 5.45721  
H 8.45266 0.97204 6.60826  
H 9.57690 1.78079 3.89761  
O 7.51973 6.21635 6.44245  
H 8.09119 6.98255 6.14912  
C 8.97001 8.83822 5.69567  
C 9.24657 9.08099 7.07622  
C 10.44686 8.72392 7.63652  
H 11.53971 8.06697 6.83545  
C 11.18803 7.86622 5.38498  
C 9.97147 8.24040 4.87147  
H 8.03955 1.18525 5.25757  
H 8.48685 9.56018 7.68740  
H 10.64105 8.91497 8.68800  
H 12.47411 8.65514 6.91910  
H 11.81542 7.09795 7.29585  
H 11.94026 7.41592 4.74375  
H 9.76146 8.08883 3.81631

67

FeO+CHD syn React unboun (2/7)  
Fe 6.07574 3.95675 5.31616  
H 2.60705 4.20187 2.49336  
H 2.04023 3.97852 4.78128  
H 2.56827 5.79985 6.33456  
H 3.28858 5.60363 3.26608  
C 3.39757 4.51735 3.18638  
H 3.81275 6.36019 5.19304  
C 3.09748 3.82580 4.52027  
C 3.62295 5.70892 6.04411  
H 2.68545 3.61556 7.30113  
H 5.20939 6.62617 3.51957  
H 3.25935 2.74797 4.41413  
H 4.72984 4.50950 1.48464  
H 4.25292 6.04130 6.86964  
N 3.93965 4.28367 5.69079  
H 6.11238 6.43214 2.00051  
C 4.72601 4.13816 2.52060  
C 3.67122 3.38589 6.87446  
H 3.63684 2.35817 6.50373  
C 6.07140 6.14475 3.05998  
H 4.80396 3.04760 2.47668  
H 4.76822 4.55953 8.32737  
N 5.97346 4.65502 3.20096

H 6.97285 6.49367 3.56527  
C 4.74427 3.53636 7.94713  
H 4.50869 2.88209 8.79740  
H 7.04575 3.95474 1.47424  
O 8.12339 6.82120 5.88590  
C 7.18856 4.02282 2.56107  
H 5.44563 1.25882 6.96669  
N 6.12122 3.21347 7.41539  
H 6.63617 1.96063 2.94287  
H 8.03533 4.69067 2.73158  
H 6.98021 4.97389 8.24078  
C 7.47635 2.63544 3.12627  
C 6.32498 1.71458 7.43150  
H 6.63517 0.86997 4.81085  
H 6.34667 1.38984 8.48269  
C 7.14668 3.89626 8.27264  
H 7.07657 3.54814 9.31202  
N 7.70038 2.68120 4.61960  
H 8.35766 2.20786 2.62978  
C 7.57392 1.28642 5.19121  
H 9.14326 4.25755 4.50671  
C 7.58504 1.20368 6.72225  
H 8.14954 3.68875 7.90151  
H 7.66368 0.13736 6.97029  
C 9.05806 3.25196 4.91862  
H 8.39496 0.67698 4.78685  
H 9.21293 3.31472 5.99410  
H 8.48809 1.65979 7.14016  
H 9.83779 2.61531 4.48109  
O 7.41977 7.31170 6.80402  
H 9.33466 9.23748 7.32418  
C 10.37722 9.28482 6.96462  
C 11.17001 8.13594 7.54175  
C 11.82772 7.23855 6.79272  
C 11.85558 7.27123 5.28272  
C 11.05334 8.41311 4.70548  
C 10.39578 9.31099 5.45517  
H 10.75790 10.24119 7.36168  
H 11.19338 8.05805 8.62718  
H 12.38432 6.43526 7.27212  
H 12.89913 7.33067 4.92879  
H 11.48673 6.31273 4.87955  
H 11.02908 8.49098 3.62003  
H 9.83915 10.11405 4.97553

67

FeO+CHD syn TS unboun (2/7)  
Fe 6.23298 4.16763 5.26191  
H 2.55068 4.53855 2.75746  
H 2.14414 4.35747 5.07987  
H 2.83690 6.11838 6.62151  
H 3.34600 5.91613 3.46290  
C 3.40338 4.82581 3.38606  
H 4.00568 6.66528 5.39516  
C 3.17375 4.15762 4.74732  
C 3.86419 6.00400 6.24892  
H 3.01372 3.93992 7.57803  
H 5.26183 6.87692 3.57966  
H 3.27846 3.07328 4.63504  
H 4.59140 4.73271 1.58098  
H 4.56823 6.30398 7.02510  
N 4.11815 4.58074 5.84906  
H 5.96561 6.65436 1.96057  
C 6.6157 4.38770 2.62301  
C 3.93146 3.67006 7.03708  
H 3.79725 2.65405 6.65728  
C 6.05742 6.38637 3.02126  
H 4.70815 3.29454 2.60392  
H 5.25160 4.74985 8.36846  
N 5.97248 4.89439 3.18738  
H 7.01567 6.73613 3.40363  
C 5.12047 3.73490 7.98801  
H 4.93843 3.08333 8.85337  
H 6.91833 4.24534 1.37096  
O 7.70449 5.82264 5.52194  
C 7.13516 4.26759 2.44749  
H 5.58599 1.45353 6.79681  
N 6.41334 3.33666 7.31303  
H 6.58124 2.20400 2.79668  
H 7.99885 4.92064 2.59027  
H 7.45048 4.97119 8.19221  
H 7.44620 2.85751 2.93652  
C 6.51231 1.82709 7.24353  
H 6.64881 1.07641 4.58725  
H 6.55690 1.44891 8.27543  
H 5.59296 3.89090 8.10976  
H 7.50700 3.44618 9.11357  
N 7.80063 2.83429 4.40455  
H 8.27078 2.43903 2.34303  
H 7.62843 1.42630 4.92994  
H 9.32796 4.31642 4.22749  
C 7.70749 1.27740 6.45350  
H 8.50599 3.67461 7.61778  
H 7.73446 0.19865 6.65481  
C 9.21234 3.29881 4.59856

H 8.39101 0.78634 4.46157  
H 9.46568 3.29847 5.65775  
H 8.65417 1.66372 6.84412  
H 9.90821 2.63495 4.06717  
O 7.45625 6.71446 6.52310  
H 8.41630 7.55741 6.48692  
C 9.44564 8.43950 6.40477  
C 10.22024 8.16392 7.60862  
C 11.37467 7.44402 7.56082  
C 11.94740 9.93651 6.27139  
C 11.19829 7.37328 5.04904  
C 10.04337 8.09541 5.12370  
H 8.79851 9.32099 6.42640  
H 9.84144 8.52924 8.55816  
H 11.92940 7.23373 8.47035  
H 13.00772 7.23520 6.18760  
H 12.00479 5.83090 6.29769  
H 11.62153 7.11327 4.08336  
H 9.53729 8.41181 4.21698

67

FeO+CHD syn Intm unboun (2/7)  
Fe 6.33996 4.28860 5.29384  
H 5.52227 4.53940 2.87396  
H 2.26061 4.22957 5.20040  
H 2.93689 6.02185 6.68318  
H 3.31247 5.91493 3.58806  
C 3.39970 4.83109 3.46479  
H 4.09832 6.62458 5.47624  
C 3.27572 4.09709 4.80165  
C 3.96659 5.94393 6.31504  
H 3.14076 3.85799 7.60228  
H 5.23307 6.93765 3.57675  
H 4.43285 3.02541 4.64354  
H 4.51518 4.85221 1.61159  
H 4.65977 6.24037 7.10123  
N 4.24324 4.52579 5.88820  
H 5.94405 6.72103 1.96186  
C 4.62629 4.45571 2.63046  
C 4.06589 3.59836 7.07277  
H 3.94746 2.58598 6.68110  
C 6.03309 6.45101 3.02137  
H 4.68537 3.36673 2.55457  
H 5.36866 4.69019 8.41573  
N 5.94594 4.95583 3.17552  
H 6.98883 6.79556 3.41281  
C 5.25071 3.67963 8.01983  
H 5.09349 3.01114 8.87558  
H 6.84941 4.32905 1.33149  
O 7.7826 5.67729 5.58941  
C 7.08664 4.33253 2.40308  
H 5.69584 1.41343 6.88613  
N 6.53753 3.10173 7.31456  
H 6.49670 2.27379 2.73420  
H 7.96171 4.97077 2.53939  
H 7.59743 4.97620 8.11150  
C 7.36831 2.91662 2.87534  
C 6.65186 1.80340 7.24562  
H 6.54230 1.15360 4.58242  
H 6.79334 1.43627 8.27177  
C 7.69174 3.89126 8.08479  
H 7.69368 3.49378 9.10749  
N 7.71924 2.88921 4.34808  
H 8.19389 2.48409 2.29684  
C 7.55544 1.46918 4.85148  
H 9.25651 4.68806 4.14822  
C 7.77289 1.26984 6.35222  
H 8.63489 3.63489 7.60598  
H 7.80702 0.18539 6.51586  
C 9.13705 3.36087 4.54294  
H 8.26109 0.84098 4.29108  
H 9.38580 3.38266 5.60114  
H 8.75291 1.63727 6.67092  
H 9.82181 2.67817 4.02607  
O 7.18842 6.86237 6.36259  
H 8.01671 7.42230 6.30078  
C 9.65035 8.71821 6.07278  
C 10.05837 8.46454 7.41777  
C 11.02883 7.53794 7.70634  
C 11.72275 6.74529 6.63037  
C 11.26195 7.08527 5.23752  
C 10.28451 8.01832 5.00095  
H 8.93512 9.50671 5.85948  
H 9.58975 9.02331 8.22307  
H 11.32835 7.35762 8.73475  
H 12.81877 6.88112 6.70920  
H 11.59385 5.66098 6.81639  
H 11.73973 6.56734 4.41071  
H 9.98711 8.24115 3.98002

83

FeO+CHD+CI syn Re unboun (0/7)  
Fe 6.33887 3.49426 5.24894  
H 3.22898 4.69001 2.27540  
H 2.47547 4.51537 4.51003

|                                 |          |          |                                |          |          |                                |          |          |                                |          |          |
|---------------------------------|----------|----------|--------------------------------|----------|----------|--------------------------------|----------|----------|--------------------------------|----------|----------|
| H 3.30776                       | 6.11207  | 6.11477  | H 5.35052                      | 4.33328  | 1.40552  | H 5.12944                      | 4.35433  | 8.15883  | N 6.21140                      | 2.76903  | 7.32801  |
| H 4.19737                       | 5.83636  | 3.15846  | H 4.71522                      | 5.80119  | 6.87058  | N 6.54235                      | 4.19698  | 3.18628  | H 6.69288                      | 1.89839  | 2.69025  |
| C 4.02879                       | 4.76320  | 3.02367  | N 4.20981                      | 4.21359  | 5.52119  | H 8.00896                      | 5.71002  | 3.57414  | H 8.80114                      | 4.10831  | 3.07349  |
| H 4.78382                       | 6.37588  | 5.15741  | H 6.99602                      | 5.84653  | 2.08990  | C 4.74988                      | 3.40633  | 7.77185  | H 7.62974                      | 3.93483  | 8.40107  |
| C 3.48046                       | 4.11912  | 4.30241  | C 5.15753                      | 3.94695  | 2.41553  | H 4.28754                      | 2.86656  | 8.60833  | C 7.64799                      | 2.27478  | 3.06225  |
| C 4.33683                       | 5.76839  | 5.94267  | C 3.61454                      | 3.40405  | 6.65308  | H 7.57530                      | 3.34172  | 1.51357  | C 5.82908                      | 1.31345  | 7.15159  |
| H 2.86110                       | 3.94001  | 7.06162  | H 3.25178                      | 2.46348  | 6.23337  | O 8.20986                      | 4.38647  | 5.80616  | H 5.93728                      | 0.86837  | 4.44932  |
| H 6.31379                       | 6.33102  | 3.57267  | C 6.91061                      | 5.53992  | 3.13955  | C 7.59792                      | 3.27314  | 2.60864  | H 5.68130                      | 0.88944  | 8.15462  |
| H 3.38539                       | 3.03842  | 4.15165  | H 4.95373                      | 2.87723  | 2.32473  | H 4.58727                      | 1.09033  | 6.63676  | C 7.35040                      | 2.88840  | 8.30307  |
| H 5.41272                       | 4.47017  | 1.39075  | H 4.99168                      | 4.10574  | 8.17681  | N 5.93407                      | 2.60703  | 7.26105  | H 7.03710                      | 2.50471  | 9.28120  |
| H 4.91763                       | 5.90489  | 6.85482  | N 6.44142                      | 4.10910  | 3.20525  | H 6.39567                      | 1.46560  | 2.70042  | N 7.67339                      | 2.06773  | 4.55981  |
| N 4.32623                       | 4.32045  | 5.53873  | H 7.88460                      | 5.63484  | 3.61676  | H 8.57423                      | 3.63259  | 2.94231  | H 8.43887                      | 1.67288  | 2.59769  |
| H 7.15217                       | 5.97420  | 2.04619  | C 4.63629                      | 3.16446  | 7.75261  | H 7.30355                      | 3.82832  | 8.36586  | C 6.93916                      | 0.78487  | 4.88380  |
| C 5.25620                       | 4.08094  | 2.40849  | H 4.17799                      | 2.58568  | 8.56497  | C 7.36504                      | 1.83514  | 3.04092  | H 9.67689                      | 2.81703  | 4.59494  |
| C 3.77701                       | 3.47980  | 6.66602  | H 7.49244                      | 3.31559  | 1.51360  | C 5.54228                      | 1.14414  | 7.16475  | C 6.83089                      | 0.45721  | 6.37412  |
| C 3.50044                       | 2.50908  | 6.24583  | O 8.09478                      | 4.32269  | 5.81742  | H 5.67155                      | 0.49656  | 4.50524  | H 8.20894                      | 2.31664  | 7.95663  |
| C 7.03020                       | 5.66443  | 3.09379  | C 7.51702                      | 3.22234  | 2.60688  | H 5.67155                      | 0.49656  | 4.50524  | H 6.46825                      | -0.57620 | 6.44211  |
| H 5.05897                       | 3.00825  | 2.32016  | H 4.54911                      | 0.87285  | 6.54520  | C 7.07577                      | 2.77219  | 8.23089  | C 9.10254                      | 1.99922  | 5.02740  |
| H 5.06603                       | 4.28533  | 8.21489  | N 5.84460                      | 2.40978  | 7.22856  | H 6.79003                      | 2.34541  | 9.19998  | H 7.68103                      | -0.03292 | 4.36692  |
| N 6.55171                       | 4.24457  | 3.16718  | H 6.35382                      | 1.38801  | 2.65741  | N 7.40229                      | 1.70964  | 4.54948  | H 9.15506                      | 2.07540  | 6.11050  |
| H 7.98972                       | 5.75131  | 3.60221  | H 8.48340                      | 3.59788  | 2.95083  | H 8.13402                      | 1.18540  | 2.60601  | H 7.81480                      | 0.44873  | 6.83500  |
| C 4.79690                       | 3.31742  | 7.78779  | H 7.17148                      | 3.63658  | 8.37735  | C 6.66883                      | 0.44637  | 4.95479  | H 9.54167                      | 1.04591  | 4.70676  |
| H 4.35958                       | 2.71307  | 8.59504  | C 7.31608                      | 1.76965  | 3.00522  | H 9.39957                      | 2.48822  | 4.56927  | O 7.39219                      | 5.48558  | 6.51606  |
| H 7.50496                       | 3.35704  | 1.45903  | C 5.49370                      | 0.93902  | 7.09095  | C 6.54719                      | 0.22909  | 6.46350  | H 7.62479                      | 7.19688  | 6.42343  |
| O 8.37460                       | 6.10329  | 6.67226  | H 5.67898                      | 0.32931  | 4.42080  | H 7.96233                      | 2.25385  | 7.87000  | C 8.26903                      | 8.23149  | 6.62684  |
| C 7.60212                       | 3.34565  | 2.55374  | H 5.31750                      | 0.55564  | 8.10494  | H 6.17668                      | -0.79429 | 6.60172  | C 9.38780                      | 8.03727  | 7.59103  |
| H 4.93835                       | 0.97454  | 6.71437  | C 6.97519                      | 2.57868  | 8.21070  | C 8.83651                      | 1.66617  | 5.00960  | C 10.68084                     | 8.24576  | 7.25033  |
| N 6.06900                       | 2.66492  | 7.29651  | H 6.69775                      | 2.11414  | 9.16486  | H 7.19978                      | -0.40074 | 4.50001  | C 11.09871                     | 8.72096  | 5.89040  |
| H 6.50882                       | 1.48568  | 2.80001  | N 7.35803                      | 1.60798  | 4.50940  | H 8.89374                      | 1.74926  | 6.09234  | C 9.95066                      | 9.06629  | 4.98853  |
| H 8.57965                       | 3.76484  | 2.79901  | H 8.09782                      | 1.14788  | 2.55159  | H 7.52498                      | 0.24924  | 6.95411  | C 8.65986                      | 8.85308  | 3.33096  |
| H 7.27925                       | 4.10581  | 8.28555  | C 6.67142                      | 0.31060  | 4.88320  | H 9.28265                      | 0.71352  | 4.69877  | H 7.40822                      | 8.73867  | 7.09093  |
| C 7.48124                       | 1.91245  | 3.06013  | H 9.31949                      | 2.47010  | 4.57718  | O 7.22279                      | 5.26059  | 6.17956  | H 9.12030                      | 7.70376  | 8.58976  |
| C 5.87535                       | 1.16774  | 7.24558  | C 6.53475                      | 0.06598  | 6.38692  | H 8.31259                      | 8.45910  | 6.29938  | H 11.47018                     | 8.08119  | 7.97965  |
| H 6.10909                       | 0.37312  | 4.60995  | H 7.87906                      | 2.09846  | 7.83956  | C 8.95865                      | 9.29031  | 6.63105  | H 11.77908                     | 9.58522  | 5.98358  |
| H 5.74656                       | 0.81053  | 2.78869  | H 6.19307                      | -0.97008 | 6.53575  | C 10.14763                     | 8.74015  | 7.38333  | H 11.72085                     | 7.94532  | 5.40348  |
| C 7.18651                       | 3.02110  | 8.23296  | H 8.79212                      | 1.60179  | 4.97014  | H 11.42006                     | 8.94798  | 7.01257  | H 10.19391                     | 5.91453  | 4.02856  |
| H 6.98338                       | 2.62985  | 9.23988  | H 7.24077                      | -0.50926 | 4.42463  | C 11.81566                     | 9.75442  | 5.79668  | H 7.86159                      | 9.13012  | 4.64720  |
| N 7.61734                       | 1.84650  | 4.56187  | H 8.84323                      | 1.63023  | 6.05627  | C 10.62727                     | 10.34566 | 5.07432  | C 5.37334                      | 7.33166  | 11.88931 |
| H 8.25170                       | 1.28709  | 2.58841  | H 7.50492                      | 0.10651  | 8.89139  | C 9.35519                      | 10.13812 | 5.44538  | F 4.16556                      | 6.69822  | 12.14268 |
| C 7.10120                       | 0.51442  | 5.05219  | H 9.28122                      | 0.68665  | 4.61355  | H 8.32078                      | 9.87081  | 7.31732  | F 6.13473                      | 7.25218  | 13.04619 |
| H 9.43577                       | 2.98118  | 4.56798  | O 7.07416                      | 5.10116  | 6.26019  | H 9.92408                      | 8.15209  | 8.27089  | F 5.10032                      | 8.67174  | 11.66063 |
| C 7.00117                       | 0.37125  | 6.57505  | H 8.48396                      | 9.25494  | 6.08659  | H 12.23287                     | 8.52491  | 7.60052  | S 6.25619                      | 6.55536  | 10.44015 |
| H 8.12728                       | 2.60183  | 7.87794  | C 9.23592                      | 9.96114  | 6.47717  | H 12.51362                     | 10.55694 | 6.08967  | O 7.49935                      | 7.36289  | 10.33611 |
| H 6.78778                       | -0.68751 | 6.77089  | C 10.19208                     | 9.23228  | 7.39238  | H 12.39663                     | 9.12234  | 5.10410  | O 5.28460                      | 6.74467  | 9.32899  |
| O 9.05681                       | 2.03472  | 4.95370  | C 11.52063                     | 9.20856  | 7.20737  | H 10.84532                     | 10.96872 | 4.20856  | O 6.44515                      | 5.15047  | 10.88145 |
| H 7.75734                       | -0.27367 | 4.65373  | C 12.21883                     | 9.90468  | 6.06175  | H 8.54439                      | 10.59368 | 4.87933  | C 13.01706                     | 5.24231  | 1.85433  |
| H 9.15201                       | 2.04352  | 6.03860  | C 11.26093                     | 10.63158 | 5.14680  | C 6.22654                      | 6.69109  | 11.52894 | F 13.49823                     | 6.50534  | 1.54200  |
| H 7.96519                       | 0.56279  | 4.50701  | C 9.93269                      | 10.65635 | 5.33124  | F 5.77213                      | 5.42059  | 11.85249 | F 14.08736                     | 4.88905  | 2.31251  |
| H 9.66308                       | 1.21231  | 4.55039  | H 8.64671                      | 10.69201 | 7.05726  | F 7.22127                      | 7.01997  | 12.43811 | F 12.57455                     | 6.62629  | 0.67445  |
| O 7.63943                       | 7.03754  | 6.27148  | H 9.74434                      | 8.70973  | 8.23494  | F 5.17356                      | 7.57155  | 11.72637 | S 11.65148                     | 5.33148  | 3.12328  |
| H 8.45207                       | 9.68693  | 6.69796  | H 12.15585                     | 8.66586  | 7.90552  | S 6.86062                      | 6.76231  | 9.77520  | O 10.61848                     | 6.15284  | 2.44288  |
| C 9.32645                       | 10.18674 | 7.14798  | H 12.97127                     | 10.61049 | 6.45361  | O 7.28145                      | 8.17790  | 9.63133  | O 11.29396                     | 3.90043  | 3.31800  |
| C 10.15425                      | 9.17692  | 7.90796  | H 12.80368                     | 9.17214  | 5.48172  | O 5.66040                      | 6.37509  | 8.98236  | O 12.31869                     | 5.97825  | 4.28371  |
| C 11.45742                      | 8.96138  | 7.67277  | H 11.70085                     | 11.15599 | 4.30020  | O 9.95984                      | 5.76341  | 9.78218  | 83                             |          |          |
| C 12.25132                      | 9.69870  | 6.61922  | H 9.29825                      | 11.20059 | 4.63375  | C 12.68520                     | 5.84653  | 3.16310  | FeOO+CHD+CI syn Im QSIII (0/5) |          |          |
| C 11.41646                      | 10.69268 | 5.84577  | C 6.55125                      | 6.93810  | 11.35491 | F 13.25769                     | 7.01616  | 3.64663  | Fe 6.34081                     | 3.56497  | 5.17662  |
| C 10.11374                      | 10.90925 | 6.00860  | F 6.21286                      | 5.77815  | 12.03646 | F 13.66532                     | 4.86557  | 3.18675  | H 2.78837                      | 3.96601  | 2.32069  |
| H 8.88865                       | 10.91647 | 7.85081  | F 7.66358                      | 7.47945  | 11.98255 | F 12.34974                     | 6.06744  | 1.83585  | H 2.24351                      | 3.88342  | 4.60094  |
| H 9.63506                       | 8.61305  | 6.88008  | F 5.50504                      | 7.83414  | 11.51405 | N 11.19635                     | 5.34952  | 4.17330  | H 2.98143                      | 5.75663  | 5.88261  |
| H 11.99869                      | 8.22002  | 8.25822  | S 6.89139                      | 6.59304  | 9.55267  | O 10.27339                     | 6.49700  | 3.98154  | H 3.71399                      | 5.26502  | 3.01490  |
| H 13.10804                      | 10.21368 | 7.08727  | O 7.23017                      | 7.93406  | 9.01300  | O 10.76963                     | 4.08275  | 3.51478  | C 3.64072                      | 4.17334  | 2.97947  |
| H 12.71115                      | 8.97770  | 5.92350  | O 5.59348                      | 6.03181  | 9.08466  | O 11.75980                     | 5.19385  | 5.53699  | H 4.46200                      | 6.05116  | 4.92416  |
| H 11.92644                      | 11.25038 | 5.06209  | O 8.01397                      | 5.62246  | 6.30969  | 83                             |          |          |                                |          |          |
| H 9.57012                       | 11.64165 | 5.48621  | C 12.49427                     | 5.99320  | 3.35428  | FeOO+CHD+CI syn TS QSIII (0/5) |          |          |                                |          |          |
| C 5.88791                       | 7.06319  | 11.58973 | F 13.11099                     | 7.13347  | 3.85238  | Fe 6.62702                     | 3.83148  | 5.40200  |                                |          |          |
| F 5.63670                       | 5.78647  | 12.07130 | F 13.43548                     | 4.97464  | 3.36782  | H 3.43541                      | 4.99169  | 2.40846  |                                |          |          |
| F 6.66377                       | 7.71816  | 12.53561 | F 12.17039                     | 6.24338  | 2.02917  | H 2.70859                      | 4.74653  | 4.64629  |                                |          |          |
| F 4.67202                       | 7.26255  | 11.51742 | S 10.98371                     | 5.54021  | 4.35389  | H 3.50798                      | 6.43038  | 6.07852  |                                |          |          |
| S 6.74456                       | 7.01221  | 9.93289  | O 10.10716                     | 6.72717  | 4.18667  | H 4.36953                      | 6.15772  | 3.30368  |                                |          |          |
| O 6.93177                       | 8.44993  | 9.61249  | O 10.50999                     | 4.30558  | 3.66723  | C 4.23565                      | 5.08212  | 3.15374  |                                |          |          |
| O 5.75638                       | 6.29844  | 9.07765  | O 11.53628                     | 5.33505  | 5.71565  | H 5.10874                      | 6.67720  | 5.33893  |                                |          |          |
| O 7.98611                       | 6.25510  | 10.22913 | 83                             |          |          |                                |          |          |                                |          |          |
| C 12.55970                      | 6.47034  | 3.13112  | FeOO+CHD+CI syn Re QSIII (0/5) |          |          |                                |          |          |                                |          |          |
| F 13.17976                      | 7.59220  | 3.66599  | Fe 6.34793                     | 3.50245  | 5.28102  |                                |          |          |                                |          |          |
| F 13.51200                      | 5.46452  | 3.06068  | H 3.23717                      | 4.66890  | 2.23934  |                                |          |          |                                |          |          |
| S 12.18770                      | 6.78333  | 1.83212  | H 2.48760                      | 4.55391  | 4.48367  |                                |          |          |                                |          |          |
| F 11.08972                      | 5.95224  | 4.15808  | H 3.36614                      | 6.24616  | 5.89739  |                                |          |          |                                |          |          |
| O 10.21282                      | 7.14830  | 4.10667  | H 4.20843                      | 5.83475  | 3.09279  |                                |          |          |                                |          |          |
| O 10.58086                      | 4.76488  | 3.41669  | C 4.03434                      | 4.75974  | 2.98769  |                                |          |          |                                |          |          |
| O 11.69751                      | 5.65519  | 5.47928  | H 4.94334                      | 6.40037  | 5.08989  |                                |          |          |                                |          |          |
| 83                              |          |          | C 3.48750                      | 4.14812  | 4.27828  |                                |          |          |                                |          |          |
| FeOO+CHD+CI syn Re sideon (0/7) |          |          | C 4.38906                      | 5.85280  | 5.84854  |                                |          |          |                                |          |          |
| Fe 6.23520                      | 3.36090  | 5.27415  | H 2.87414                      | 4.19792  | 7.06665  |                                |          |          |                                |          |          |
| H 3.13735                       | 4.55778  | 2.24573  | H 6.33432                      | 6.30296  | 3.54037  |                                |          |          |                                |          |          |
| H 2.36870                       | 4.39459  | 4.48243  | H 3.39004                      | 3.06432  | 4.15911  |                                |          |          |                                |          |          |
| H 3.19536                       | 6.03747  | 5.96755  | H 5.44750                      | 4.41614  | 1.38815  |                                |          |          |                                |          |          |
| H 4.09101                       | 5.71558  | 3.12947  | H 4.87941                      | 6.00204  | 6.80937  |                                |          |          |                                |          |          |
| C 3.92699                       | 4.64121  | 3.00295  | N 4.33445                      | 4.38472  | 5.51121  |                                |          |          |                                |          |          |
| H 4.76638                       | 6.25589  | 5.16408  | H 7.15172                      | 5.88230  | 2.02472  |                                |          |          |                                |          |          |
| C 3.37314                       | 4.00027  | 4.27663  | C 5.25291                      | 4.04374  | 2.40294  |                                |          |          |                                |          |          |
| C 4.22732                       | 5.67018  | 5.90558  | C 3.7255                       |          |          |                                |          |          |                                |          |          |

|                            |                             |                             |                            |
|----------------------------|-----------------------------|-----------------------------|----------------------------|
| H 7.04882 2.75010 9.22269  | H 8.08439 0.63705 6.98467   | H 8.82910 9.54400 8.01714   | O 6.78106 8.60686 8.73087  |
| N 7.51451 1.77899 4.46829  | H 9.58008 1.20044 4.46059   | H 9.82371 7.30148 8.28291   | O 5.52884 6.44890 9.01845  |
| H 8.12388 1.12406 2.51721  | O 7.21932 6.28637 5.55717   | H 12.33365 7.18368 7.97553  | O 8.01436 6.52226 9.38883  |
| C 7.07878 0.46295 5.05634  | H 7.95719 6.67042 5.01605   | H 11.58351 7.05779 6.44655  | C 11.75680 7.19786 2.82320 |
| H 9.28423 2.95143 4.26893  | C 10.59513 10.37930 7.06421 | H 13.49712 8.73977 6.37565  | F 12.11725 8.34525 3.51382 |
| C 7.10027 0.37087 6.58546  | C 9.83689 9.35384 7.66665   | H 12.46057 10.99425 6.15223 | F 12.91504 6.48977 2.54986 |
| H 8.17025 2.60813 7.84888  | C 10.39471 8.09745 7.81178  | C 6.44494 7.66332 11.16297  | F 11.20398 7.58751 1.61587 |
| H 6.96555 -0.69051 6.83338 | C 11.73254 7.80746 7.29477  | F 6.36816 6.51354 11.93440  | S 10.55814 6.16617 3.81350 |
| C 8.95527 2.04797 4.78102  | C 12.48705 8.92571 6.72459  | F 7.47812 8.43759 11.67163  | O 9.41747 7.10536 4.00943  |
| H 7.72268 -0.32961 4.64010 | C 11.91340 10.17259 6.59685 | F 5.26570 8.36905 11.34888  | O 10.30072 5.00351 2.93430 |
| H 9.08552 2.20284 5.85102  | H 10.15340 11.36514 6.95937 | S 6.72398 7.26197 9.36189   | O 11.33282 5.86304 5.05427 |
